# Supplementary material for: Divergent CO2 Activation by Tuning the Lewis Acid in Iron‐Based Bimetallic Systems
Source: PubMed Central journal article supplement — Angew Chem Int Ed Engl. 2022 Aug 29;61(40):e202207581. doi: 10.1002/anie.202207581 (PMC9804805; doi:10.1002/anie.202207581), 2022-08-29
Supplement: ANIE-61-0-s005.pdf [file ANIE-61-0-s005.pdf]

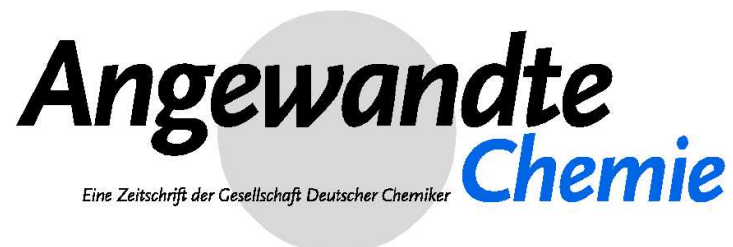

## Supporting Information

### **Divergent CO<sub>2</sub> Activation by Tuning the Lewis Acid in Iron-Based Bimetallic Systems**

*H. Corona, M. Pérez-Jiménez, F. de la Cruz-Martínez, I. Fernández\*, J. Campos\**

# Supporting Information

## Table of Contents

|                                                                                     |     |
|-------------------------------------------------------------------------------------|-----|
| 1. General considerations.....                                                      | S2  |
| 2. Synthesis and characterization of new compounds.....                             | S3  |
| 3. General procedure for the hydrogenation of compounds <b>2</b> and <b>3</b> ..... | S8  |
| 4. Spectroscopic data of compounds.....                                             | S9  |
| 5. Variable temperature experiments.....                                            | S26 |
| 6. Crystal structure determinations.....                                            | S28 |
| 7. Computational details .....                                                      | S34 |
| 8. References.....                                                                  | S84 |

## 1. General considerations

All preparations and manipulations were performed by using standard Schlenk and glovebox techniques, under an atmosphere of high purity nitrogen. All solvents were dried, stored over 4 Å molecular sieves, and degassed prior to use. Toluene (C<sub>7</sub>H<sub>8</sub>) and *n*-pentane (C<sub>5</sub>H<sub>12</sub>), THF and diethyl ether were distilled under nitrogen over sodium. Toluene-*d*<sub>8</sub>, C<sub>6</sub>D<sub>6</sub> and thf-*d*<sub>8</sub> were dried over sodium and distilled under argon. [AuCl(THT)] (THT = tetrahydrothiophene),<sup>1</sup> the phosphine ligand PMe<sub>2</sub>Ar<sup>Xyl</sup>,<sup>2</sup> [Fe(N<sub>2</sub>)(depe)<sub>2</sub>],<sup>3</sup> [Fe(CO)<sub>2</sub>(depe)<sub>2</sub>],<sup>4</sup> Al(C<sub>6</sub>F<sub>5</sub>)<sub>3</sub><sup>5</sup> and [(PMe<sub>2</sub>Ar<sup>Xyl</sup>)<sub>2</sub>Au]NTf<sub>2</sub><sup>6</sup> were prepared as described previously. B(C<sub>6</sub>F<sub>5</sub>)<sub>3</sub> was purchased from TCI Chemicals and sublimated twice. All other reagents were used as received from commercial suppliers. Solution NMR spectra were recorded with Bruker AMX-300, DRX-400, and DRX-500 spectrometers. Spectra were referenced to external SiMe<sub>4</sub> (d: 0 ppm) by using the residual proton solvent peaks as internal standards (<sup>1</sup>H NMR experiments), or the characteristic resonances of the solvent nuclei (<sup>13</sup>C NMR experiments), while <sup>31</sup>P was referenced to H<sub>3</sub>PO<sub>4</sub>. <sup>19</sup>F is referenced to fluorotrichloromethane, and <sup>11</sup>B is referenced to BF<sub>3</sub>·OEt<sub>2</sub>. The following abbreviations and their combinations are used: br, broad; s, singlet; d, doublet; t, triplet; m, multiplet. The <sup>1</sup>H and <sup>13</sup>C resonance signals were attributed by means of 2D HSQC and HMBC experiments. Infrared spectra were recorded with a Bruker Vector 22 spectrometer and preparation was made in Nujol or using a solid-state sample. For elemental analyses a LECO TruSpec CHN elementary analyzer was utilized.

## 2. Synthesis and characterization of new compounds

### $[(\text{depe})_2\text{Fe}(\mu\text{-CO}_2)\text{B}(\text{C}_6\text{F}_5)_3]$

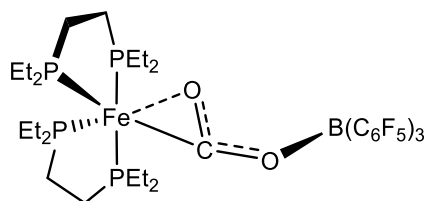

**Compound 2.** A solution of  $\text{B}(\text{C}_6\text{F}_5)_3$  (20 mg, 0.039 mmol) in THF (5 mL) was added to a solution of  $[\text{Fe}(\text{CO}_2)(\text{depe})_2]$  (20 mg, 0.039 mmol) in THF (5 mL) and stirred at room temperature under  $\text{N}_2$  atmosphere for 5 minutes. The solution turns from red to deep pink. The solvent was removed under vacuum obtaining a pink powder (33 mg, 82%). Crystals suitable for X-ray diffraction studies were obtained from a concentrated solution of compound **2** in diethyl ether at  $-30\text{ }^\circ\text{C}$ .

**Anal. Calcd.** for  $\text{C}_{39}\text{H}_{48}\text{BF}_{15}\text{FeO}_2\text{P}_4$ : C, 45.73; H, 4.72; **Found:** C, 45.65; H, 4.99.

$^1\text{H NMR}$  (400 MHz,  $\text{C}_6\text{D}_6$ ,  $25\text{ }^\circ\text{C}$ )  $\delta$ , ppm: 1.56-0.60 (br m, depe).

$^{13}\text{C}\{^1\text{H}\}$  NMR (126 MHz,  $\text{thf-}d_8$ ,  $25\text{ }^\circ\text{C}$ )  $\delta$ , ppm: 214.8 ( $\text{CO}_2$ ), 150.0 (d,  $^1J_{\text{CF}} = 240\text{ Hz}$ , *o*- $\text{C}_6\text{F}_5$ ), 140.7 (d,  $^1J_{\text{CF}} = 240\text{ Hz}$ , *p*- $\text{C}_6\text{F}_5$ ), 138.3 (d,  $^1J_{\text{CF}} = 240\text{ Hz}$ , *m*- $\text{C}_6\text{F}_5$ ), 122.6 (br, *ipso*- $\text{C}_6\text{F}_5$ ), 26.5, 21.8, 20.1, 19.5, 15.1, 9.9, 8.9, 8.2, 7.5, 5.5 (depe).

$^{11}\text{B}\{^1\text{H}\}$  NMR (128 MHz,  $\text{C}_6\text{D}_6$ ,  $25\text{ }^\circ\text{C}$ )  $\delta$ , ppm: -1.6

$^{31}\text{P}\{^1\text{H}\}$  NMR (160 MHz,  $\text{C}_6\text{D}_6$ ,  $25\text{ }^\circ\text{C}$ )  $\delta$ , ppm: 85.1, 80.4, 70.4 (relative intensities 1:1:2)

$^{31}\text{P}\{^1\text{H}\}$  NMR (160 MHz,  $\text{thf-}d_8$ ,  $-20\text{ }^\circ\text{C}$ )  $\delta$ , ppm: 85.8, 80.7, 71.0, 70.1 (relative intensities 1:1:1:1)

$^{19}\text{F}\{^1\text{H}\}$  NMR (377 MHz,  $\text{C}_6\text{D}_6$ ,  $25\text{ }^\circ\text{C}$ )  $\delta$ , ppm: -130.6, -160.9, -166.3

**IR**  $\text{cm}^{-1}$  (Nujol): 1641, 1251  $\nu(\text{CO}_2)$

**[(depe)<sub>2</sub>(CO)Fe( $\mu$ -O)Al(C<sub>6</sub>F<sub>5</sub>)<sub>3</sub>]**

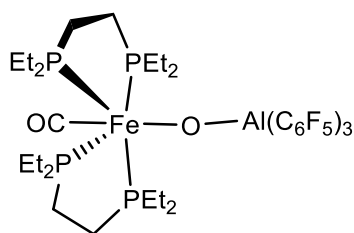

**Compound 3.** A solution of Al(C<sub>6</sub>F<sub>5</sub>)<sub>3</sub> (30 mg, 0.039 mmol) in toluene (3 mL) was added to a solution of [Fe(CO<sub>2</sub>)(depe)<sub>2</sub>] (30 mg, 0.039 mmol) in toluene (3 mL) and stirred at room temperature under N<sub>2</sub> atmosphere for 5 minutes. The solution, which colour changes from red to orange, was introduced in the glovebox freezer (-30 °C) obtaining yellow crystals after two days (16.2 mg, 27%).

**Anal. Calcd.** for C<sub>39</sub>H<sub>48</sub>AlF<sub>15</sub>FeO<sub>2</sub>P<sub>4</sub>: C, 45.02; H, 4.65; **Found:** C, 45.23; H, 4.42.

**<sup>1</sup>H NMR** (400 MHz, C<sub>6</sub>D<sub>6</sub>, 25 °C)  $\delta$ , ppm: 2.44 (br, 2H, -CH<sub>2</sub>), 2.09 (br, 2H, -CH<sub>2</sub>), 1.38 (br, 12H, -CH<sub>2</sub>), 1.09 (br, 8H, -CH<sub>2</sub>), 0.79 (br s, 12H -CH<sub>3</sub>), 0.71 (br s, 12H, -CH<sub>3</sub>).

**<sup>13</sup>C{<sup>1</sup>H} NMR** (126 MHz, C<sub>6</sub>D<sub>6</sub>, 25 °C)  $\delta$ , ppm: 213.6 (CO), 150.7 (d, <sup>1</sup>J<sub>CF</sub> = 240 Hz, *o*-C<sub>6</sub>F<sub>5</sub>), 140.9 (d, <sup>1</sup>J<sub>CF</sub> = 240 Hz, *p*-C<sub>6</sub>F<sub>5</sub>), 138.1 (d, <sup>1</sup>J<sub>CF</sub> = 240 Hz, *m*-C<sub>6</sub>F<sub>5</sub>), 22.5, 20.1, 16.1 (-CH<sub>2</sub>), 9.2, 8.0 (-CH<sub>3</sub>).

**<sup>31</sup>P{<sup>1</sup>H} NMR** (160 MHz, C<sub>6</sub>D<sub>6</sub>, 25 °C)  $\delta$ , ppm: 67.9

**<sup>19</sup>F{<sup>1</sup>H} NMR** (377 MHz, C<sub>6</sub>D<sub>6</sub>, 25 °C)  $\delta$ , ppm: -121.3, -156.0, -163.3

**IR cm<sup>-1</sup>** (solid): 1914  $\nu$ (C $\equiv$ O)

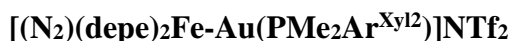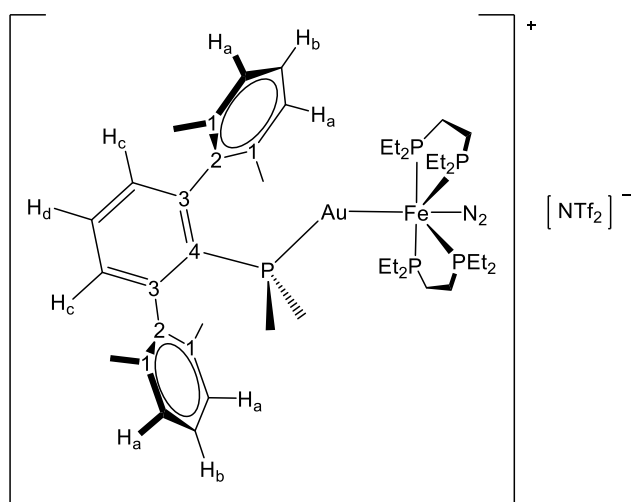

**Compound 6.**  $[Fe(depe)_2(N_2)]$  (50 mg, 0.100 mmol) and  $[(PMe_2Ar^{Xyl})Au(NTf_2)]$  (71 mg, 0.100 mmol) were placed in an ampoule inside the glovebox. Both solids were cooled down to  $-20\text{ }^\circ\text{C}$  with an acetone/ $N_2$  bath and toluene (8 mL) was added under  $N_2$  pressure. A yellow solution was formed after stirring 5 minutes at low temperature. The solvent was removed under vacuum and the green residue was washed with 5 mL of pentane at low temperature. The residue was then dissolved in 2 mL of diethyl ether and 10 mL of pentane were added. The mixture was stirred for 30 min at  $-20\text{ }^\circ\text{C}$  and then all the solvent was removed under vacuum to afford a green solid which was isolated in a 30 % yield (40 mg). Single crystals suitable for X-ray diffraction studies were obtained by dissolving compound **6** in toluene and resting 48h at  $-30\text{ }^\circ\text{C}$ .

**Anal. Calcd.** for  $C_{46}H_{75}AuF_6FeN_3O_4P_5S_2$ : C, 41.86; H, 5.73; N, 3.18; S, 4.86; **Found:** C, 41.68; H, 6.08; N, 2.95; S, 4.72.

$^1\text{H NMR}$  (400 MHz,  $C_6D_6$ ,  $25\text{ }^\circ\text{C}$ )  $\delta$ , ppm: 7.03 (br, 6H,  $H_a$ ,  $H_b$ ), 6.76 (br, 1H,  $H_d$ ), 6.62 (br, 2H,  $H_c$ ), 2.12-0.73 (m, 66H, depe,  $Me^{Xyl}$ ,  $PMe_2$ ).

$^{31}\text{P}\{^1\text{H}\}$  NMR (160 MHz,  $C_6D_6$ ,  $25\text{ }^\circ\text{C}$ )  $\delta$ , ppm: 72.4 (m,  $^3J_{PP} = 42\text{ Hz}$ ,  $P^{depe}$ ), 31.0 (q,  $^3J_{PP} = 42\text{ Hz}$ ,  $P^{Xyl}$ ).

A clean  $^{13}\text{C}\{^1\text{H}\}$  NMR spectrum could not be obtained due to the quick decomposition of compound **6** in solution, forming free terphenyl phosphine among other undetermined by-products, even at low temperatures.

**IR  $cm^{-1}$**  (Nujol): 2057  $\nu(N\equiv N)$

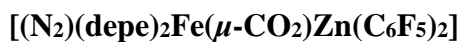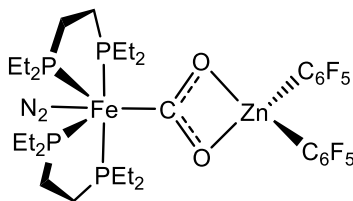

**Compound 7.** A solution of Zn(C<sub>6</sub>F<sub>5</sub>)<sub>2</sub> (16 mg, 0.039 mmol) in toluene (5 mL) was added to a solution of [Fe(CO<sub>2</sub>)(depe)<sub>2</sub>] (20 mg, 0.039 mmol) in toluene (5 mL) and stirred at -20 °C under N<sub>2</sub> atmosphere for 5 minutes. The solution colour changes from red to pink. Crystals suitable for X-ray diffraction studies were obtained from a concentrated solution of compound **7** in toluene at -30 °C (12.8 mg, 35%).

**Anal. Calcd.** for C<sub>33</sub>H<sub>48</sub>F<sub>10</sub>FeN<sub>2</sub>O<sub>2</sub>P<sub>4</sub>Zn: C, 42.17; H, 5.15; N, 2.98; **Found:** C, 42.30; H, 5.31; N, 2.79.

**<sup>1</sup>H NMR** (400 MHz, thf-*d*<sub>8</sub>, -20 °C) δ, ppm: 2.39-0.62 (m, depe).

**<sup>31</sup>P{<sup>1</sup>H} NMR** (160 MHz, thf-*d*<sub>8</sub>, 25 °C) δ, ppm: 77.8

**<sup>31</sup>P{<sup>1</sup>H} NMR** (160 MHz, thf-*d*<sub>8</sub>, -20 °C) δ, ppm: 89.1, 80.9, 74.7, 67.9

**<sup>19</sup>F{<sup>1</sup>H} NMR** (377 MHz, thf-*d*<sub>8</sub>, -20 °C) δ, ppm: -116.2, -162.0, -165.0

A clean **<sup>13</sup>C{<sup>1</sup>H} NMR** spectrum could not be obtained due to the quick decomposition of compound **7** in solution even at low temperatures.

**IR cm<sup>-1</sup>** (solid): 2105 ν(N≡N), 1633 ν(CO<sub>2</sub>).

**[(depe)<sub>2</sub>Fe–Zn(C<sub>6</sub>F<sub>5</sub>)<sub>2</sub>]**

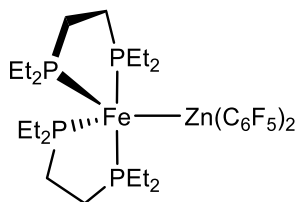

**Compound 8.** A solution of Zn(C<sub>6</sub>F<sub>5</sub>)<sub>2</sub> (16 mg, 0.039 mmol) in THF (5 mL) was added to a solution of [Fe(N<sub>2</sub>)(depe)<sub>2</sub>] (20 mg, 0.039 mmol) in toluene (5 mL) and stirred at room temperature under N<sub>2</sub> atmosphere for 5 minutes until the solution turns green. Crystals suitable for X-ray diffraction studies were obtained from a diethyl ether solution at -30 °C (9.5 mg, 28 %).

**Anal. Calcd.** for C<sub>32</sub>H<sub>48</sub>F<sub>10</sub>FeP<sub>4</sub>Zn: C, 44.29; H, 5.58; **Found:** C, 44.45; H, 5.79

**<sup>1</sup>H NMR** (400 MHz, C<sub>6</sub>D<sub>6</sub>, 25 °C) δ, ppm: 1.97-0.84 (m, depe).

**<sup>13</sup>C{<sup>1</sup>H} NMR** (126 MHz, C<sub>6</sub>D<sub>6</sub>, 25 °C) δ, ppm: 149.8 (d, <sup>1</sup>J<sub>CF</sub> = 240 Hz, *p*-C<sub>6</sub>F<sub>5</sub>), 138.1 (d, <sup>1</sup>J<sub>CF</sub> = 240 Hz, *o*-C<sub>6</sub>F<sub>5</sub>), 36.0, 34.6, 29.1, 28.5, 27.1, 25.6, 22.7, 14.3, 10.0, 9.3 (depe).

**<sup>31</sup>P{<sup>1</sup>H} NMR** (160 MHz, C<sub>6</sub>D<sub>6</sub>, 25 °C) δ, ppm: 84.6 [Fe(N<sub>2</sub>)(depe)<sub>2</sub>]; 81.2, 78.7 (Compound 8).

**<sup>19</sup>F{<sup>1</sup>H} NMR** (377 MHz, C<sub>6</sub>D<sub>6</sub>, 25 °C) δ, ppm: -116.3, -159.4, -162.5 [Fe(N<sub>2</sub>)(depe)<sub>2</sub>]; -123.1, 156.2, -160.4 (Compound 8).



### 3. General procedure for the hydrogenation of compounds **2** and **3**

In a representative example, compound **2** (10 mg, 0.010 mmol) was placed in a J. Young NMR tube and dissolved in toluene-*d*<sub>8</sub> (0.6 mL). The solution was frozen and the inert gas was removed under high vacuum. Then, the atmosphere was replaced by 1 bar of H<sub>2</sub> and the resulting mixture was kept under H<sub>2</sub> atmosphere for 24 hours. The conversion of compound **2** into **4** was determined by <sup>31</sup>P{<sup>1</sup>H} NMR spectroscopy by means of the disappearance of **2** and using triphenylphosphine oxide as internal standard. Besides, formation of compound **4** was also verified by infrared spectroscopy after solvent evaporation under vacuum inside the glovebox, giving rise to a yellow oil which was employed to record the corresponding infrared spectrum.

#### 4. Spectroscopic data of compounds

**Figure S1.**  $^{31}\text{P}\{^1\text{H}\}$  NMR (160 MHz,  $\text{C}_6\text{D}_6$ , 25 °C) for compound **2**

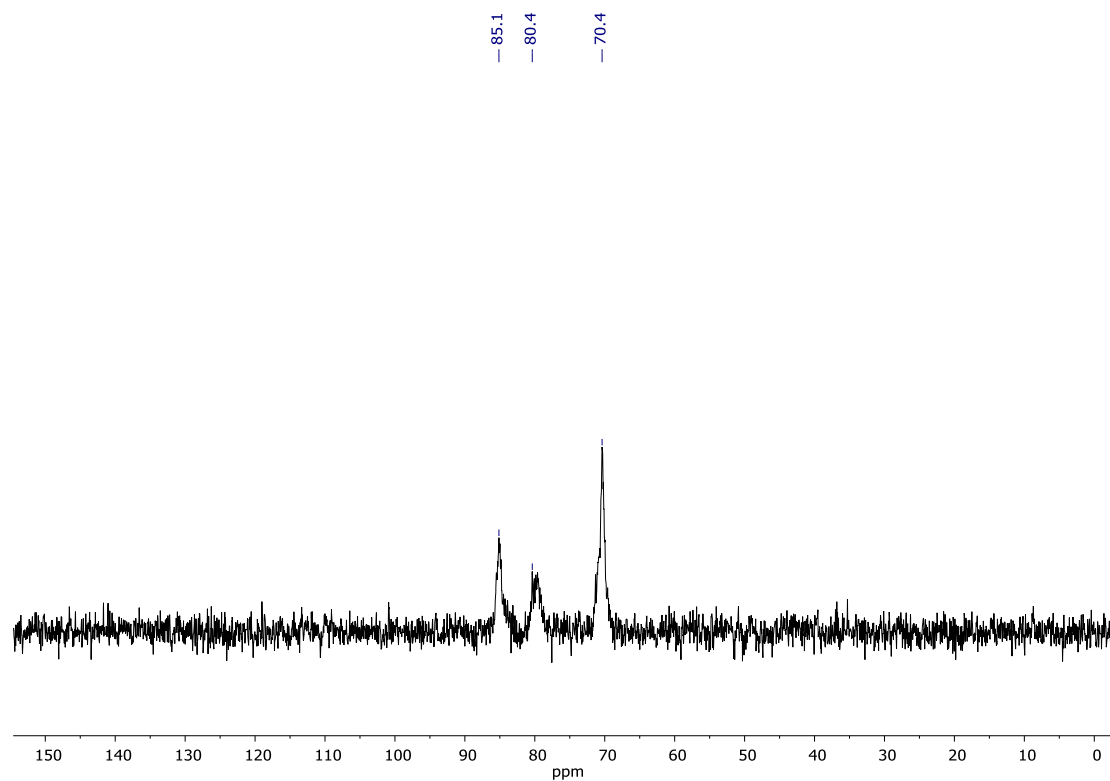

**Figure S2.**  $^{31}\text{P}\{^1\text{H}\}$  NMR (160 MHz,  $\text{thf-d}_8$ , -30 °C) for compound **2**

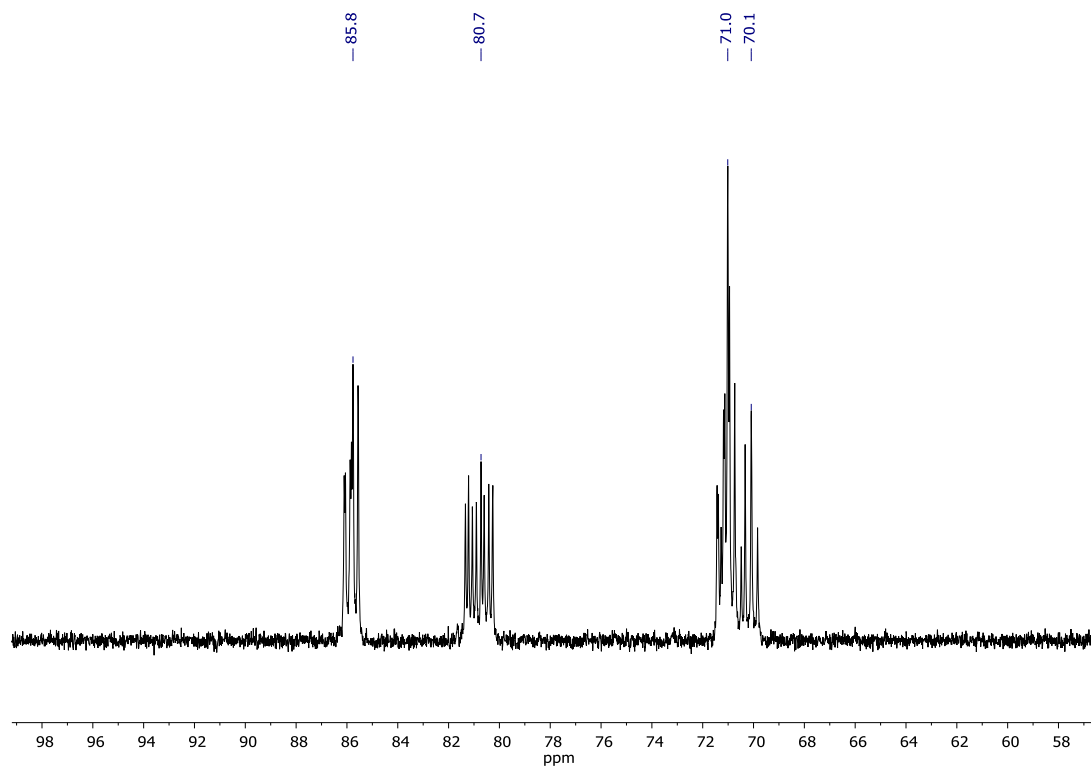

**Figure S3.**  $^{11}\text{B}\{^1\text{H}\}$  NMR (128 MHz,  $\text{C}_6\text{D}_6$ , 25 °C) for compound **2**

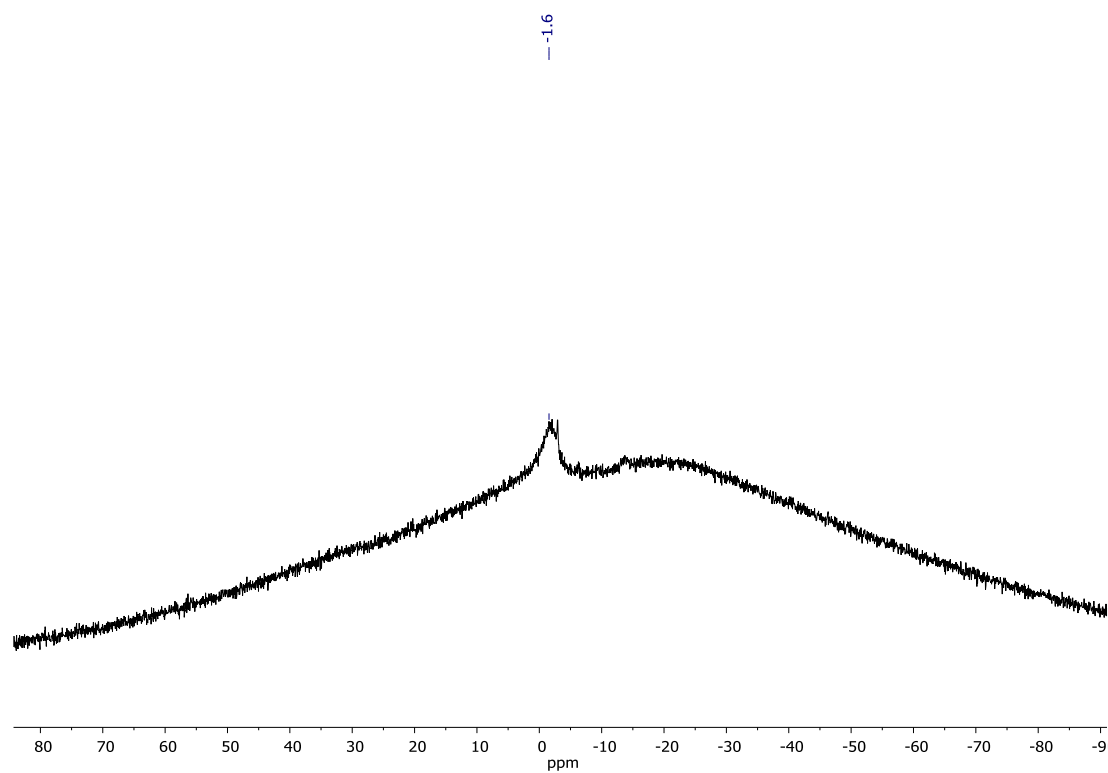

**Figure S4.**  $^1\text{H}$  NMR (400 MHz,  $\text{C}_6\text{D}_6$ , 25 °C) for compound **2**

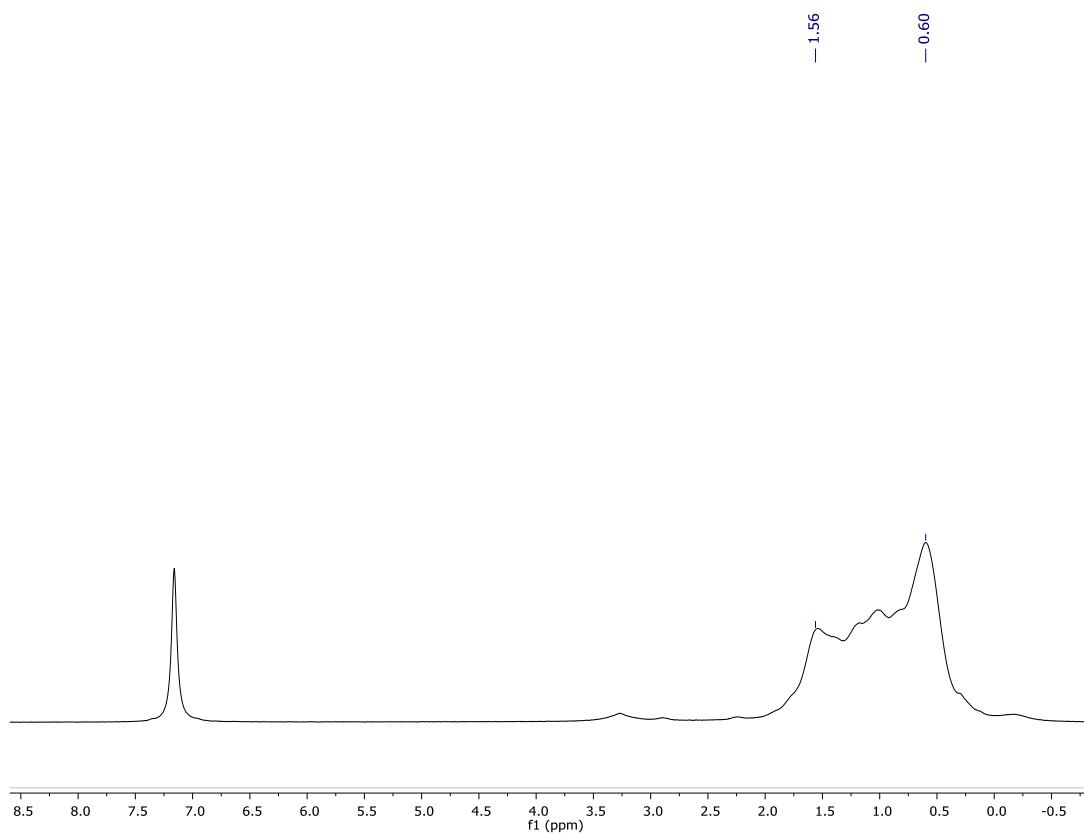

**Figure S5.**  $^{19}\text{F}\{^1\text{H}\}$  NMR (377 MHz,  $\text{C}_6\text{D}_6$ , 25 °C) for compound **2**

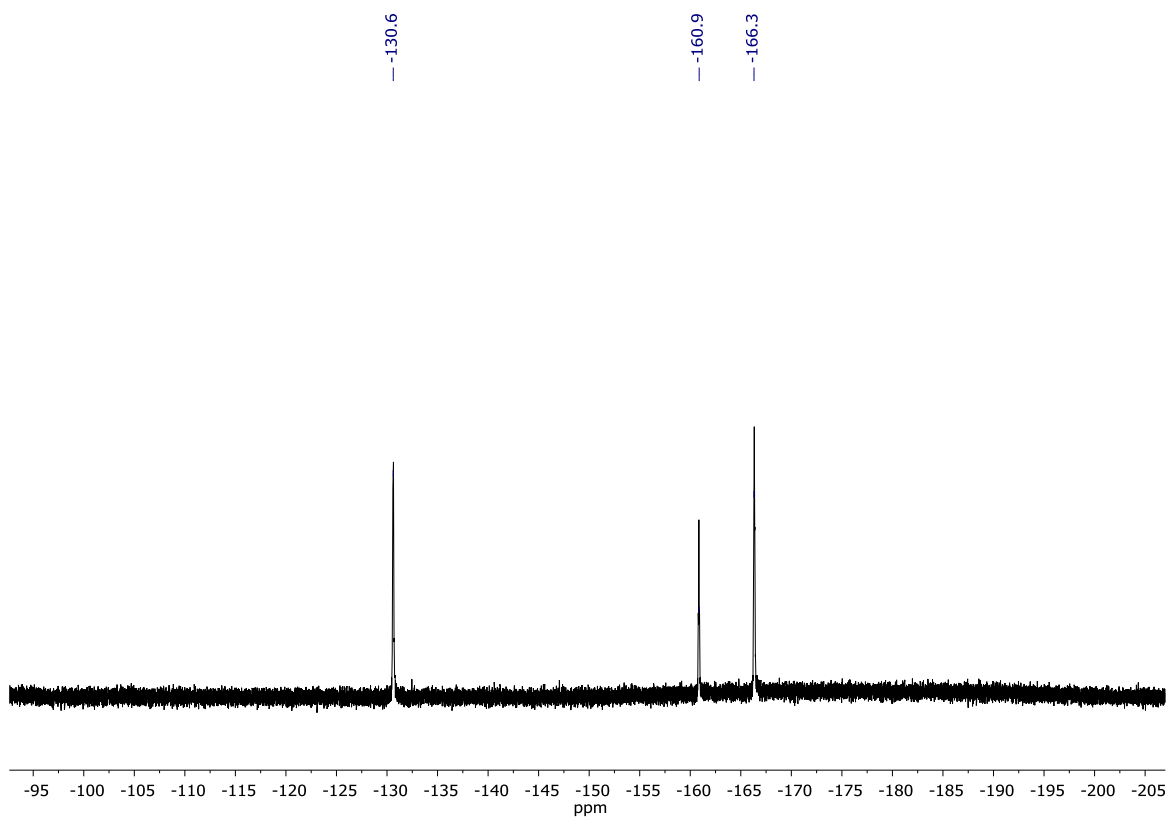

**Figure S6.**  $^{13}\text{C}\{^1\text{H}\}$  NMR (126 MHz,  $\text{thf-}d_8$ , 25 °C) for compound **2**

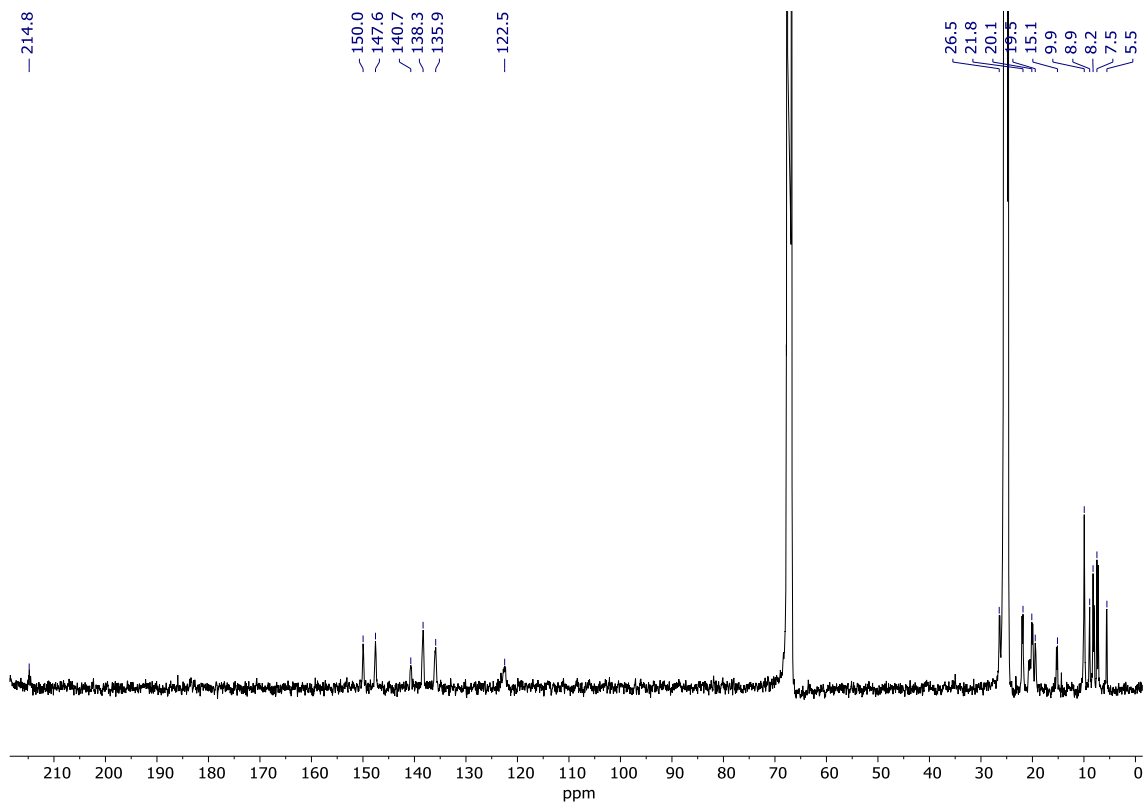

**Figure S7.** IR spectrum (Nujol) for compound **2**

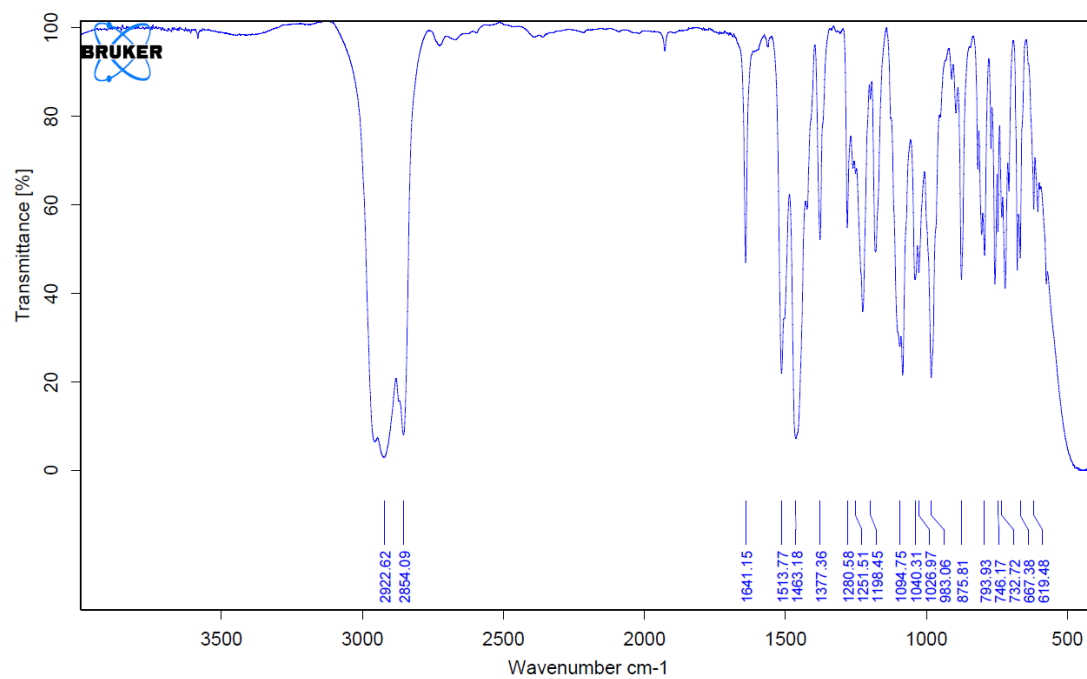

**Figure S8.** <sup>31</sup>P{<sup>1</sup>H} NMR (160 MHz, C<sub>6</sub>D<sub>6</sub>, 25 °C) for compound **3**

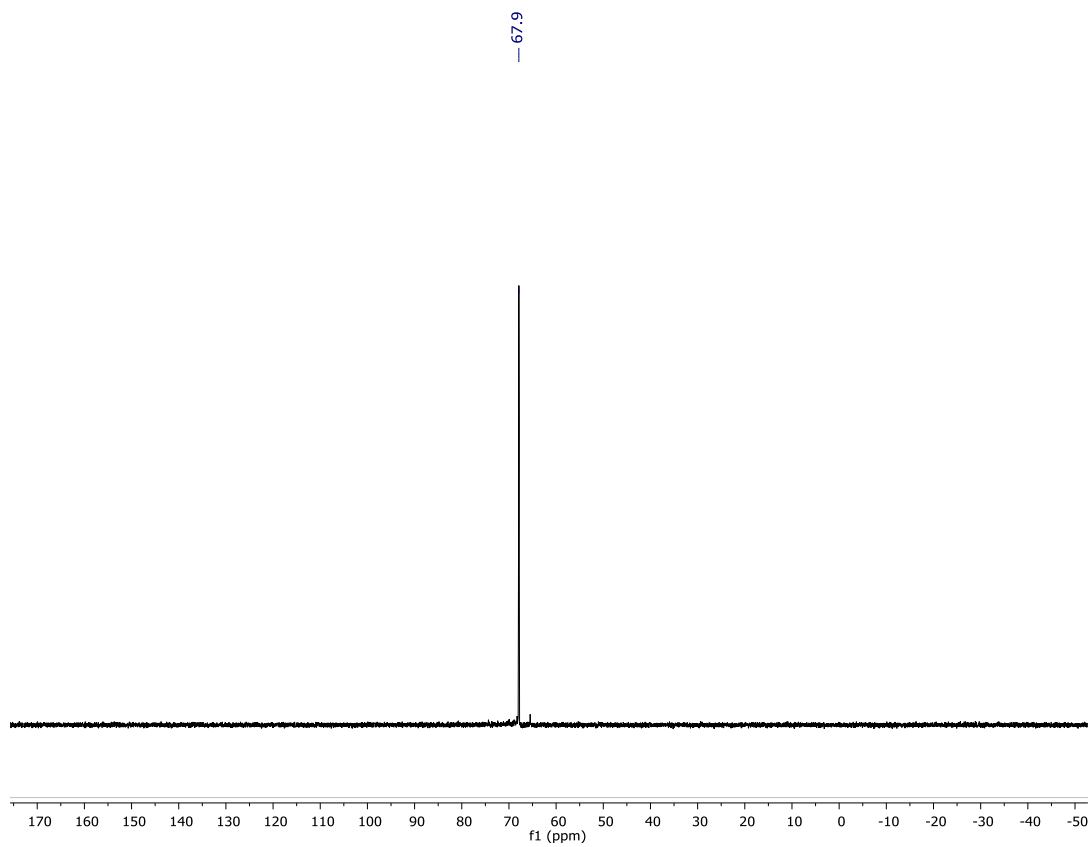

**Figure S9.**  $^1\text{H}$  NMR (400 MHz,  $\text{C}_6\text{D}_6$ , 25  $^\circ\text{C}$ ) for compound **3**

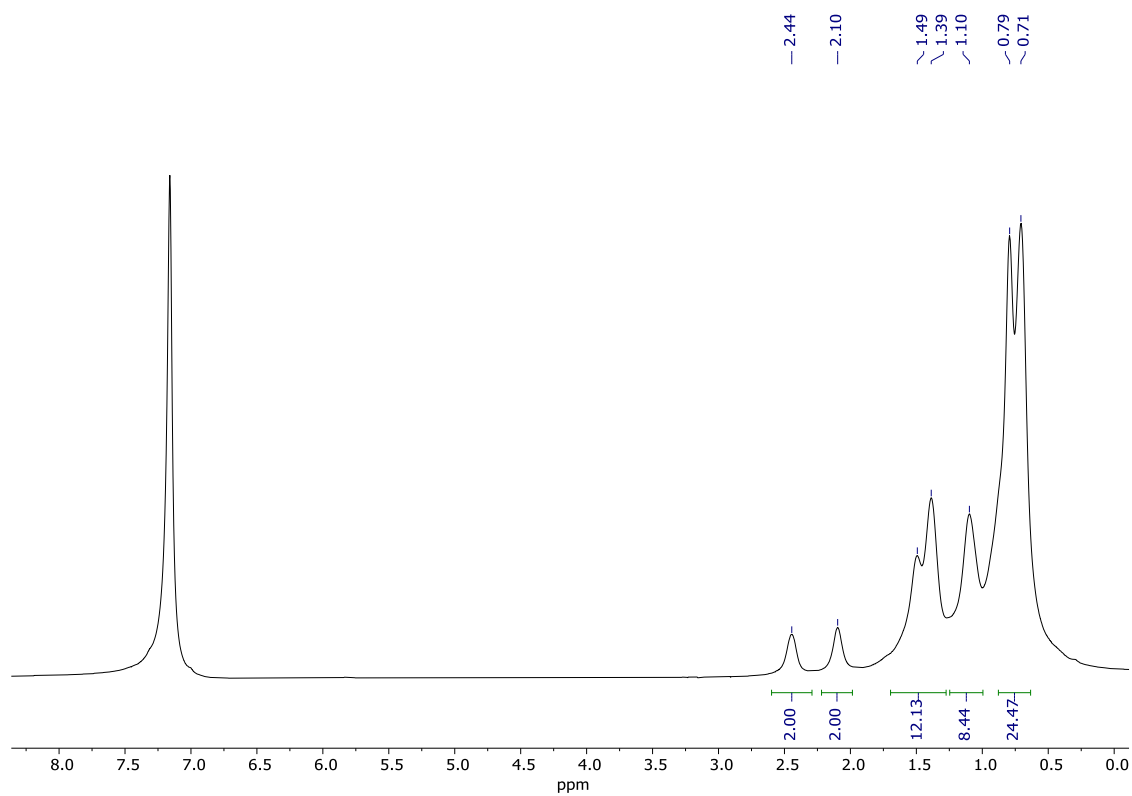

**Figure S10.**  $^{19}\text{F}\{^1\text{H}\}$  NMR (377 MHz,  $\text{C}_6\text{D}_6$ , 25  $^\circ\text{C}$ ) for compound **3**

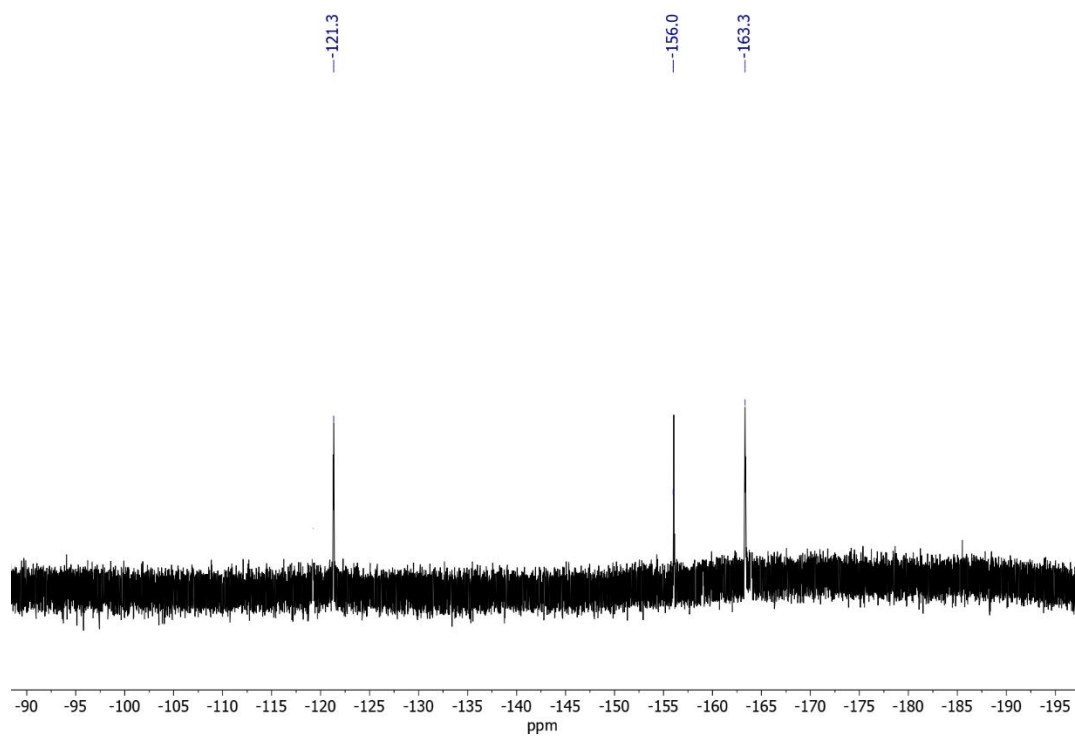

**Figure S11.**  $^{13}\text{C}\{^1\text{H}\}$  NMR (126 MHz,  $\text{C}_6\text{D}_6$ , 25 °C) for compound **3**

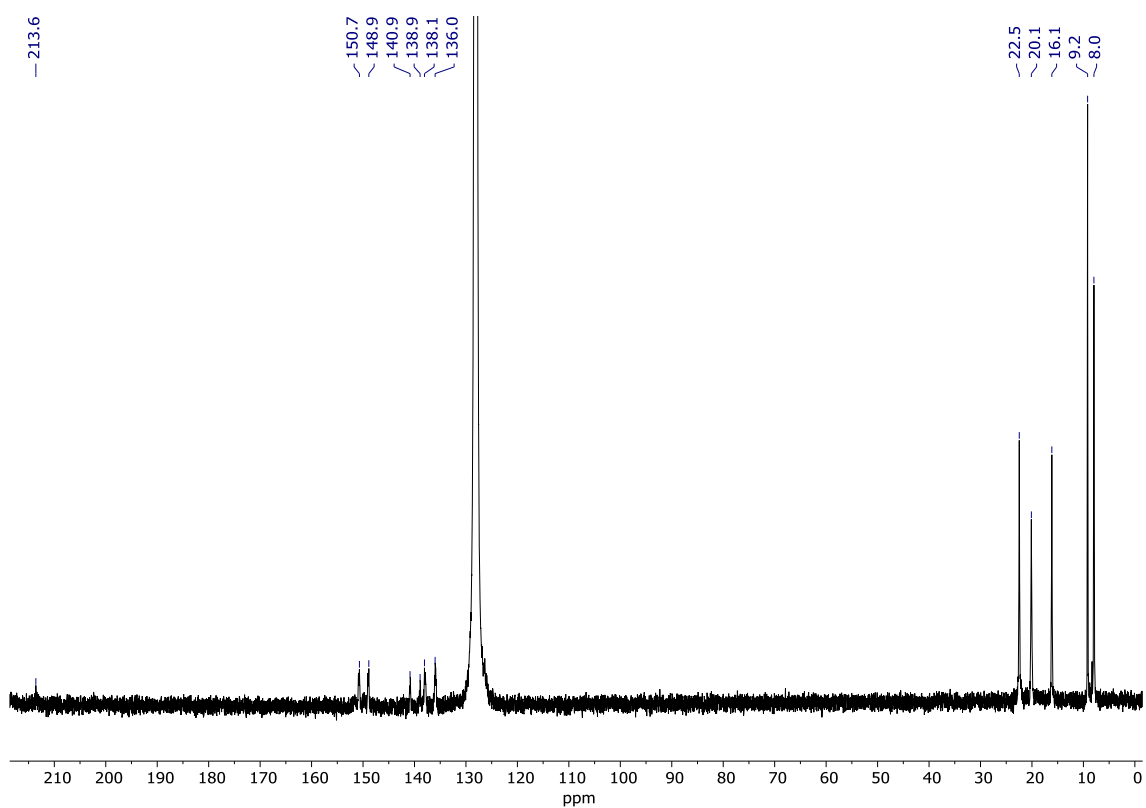

**Figure S12.** IR spectrum (solid) for compound **3**

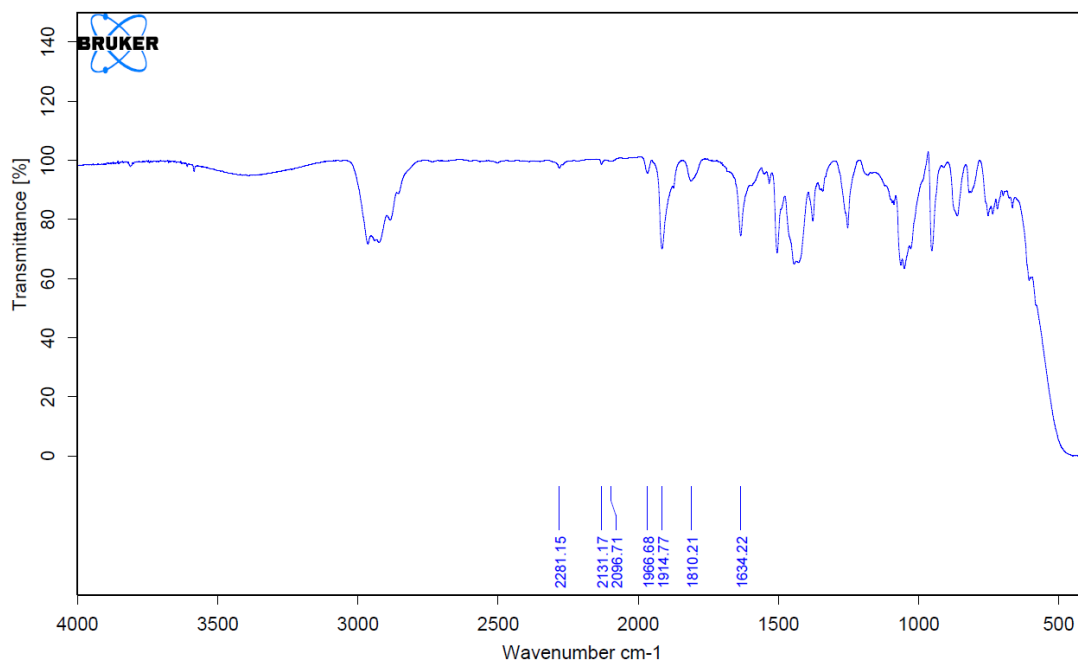

**Figure S13.**  $^{31}\text{P}\{^1\text{H}\}$  NMR (160 MHz,  $\text{tol-}d_8$ ,  $-80\text{ }^\circ\text{C}$ ) for the reaction of compound **1** with  $\text{AlEt}_3$ .

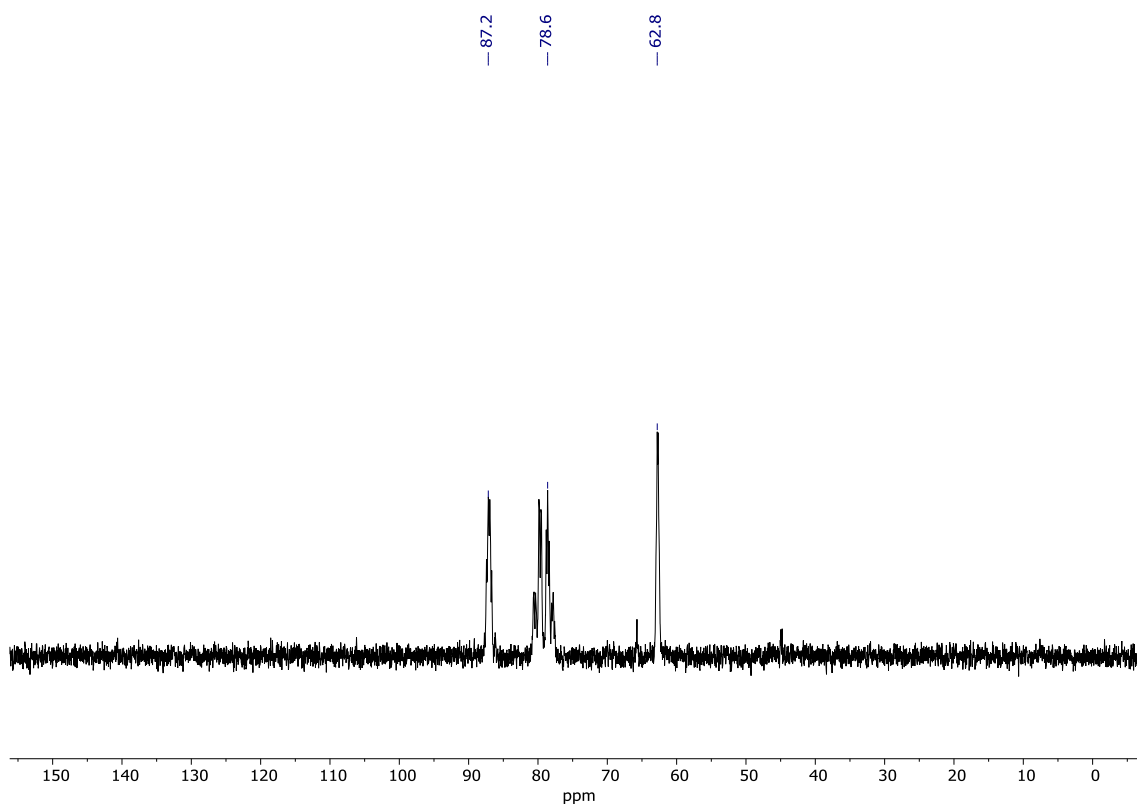

**Figure S14.**  $^{31}\text{P}\{^1\text{H}\}$  NMR (160 MHz,  $\text{tol-}d_8$ ,  $-20\text{ }^\circ\text{C}$ ) for the reaction of complex **2** with  $\text{H}_2$  (1 bar  $\text{H}_2$ ,  $25\text{ }^\circ\text{C}$ , 24 h).

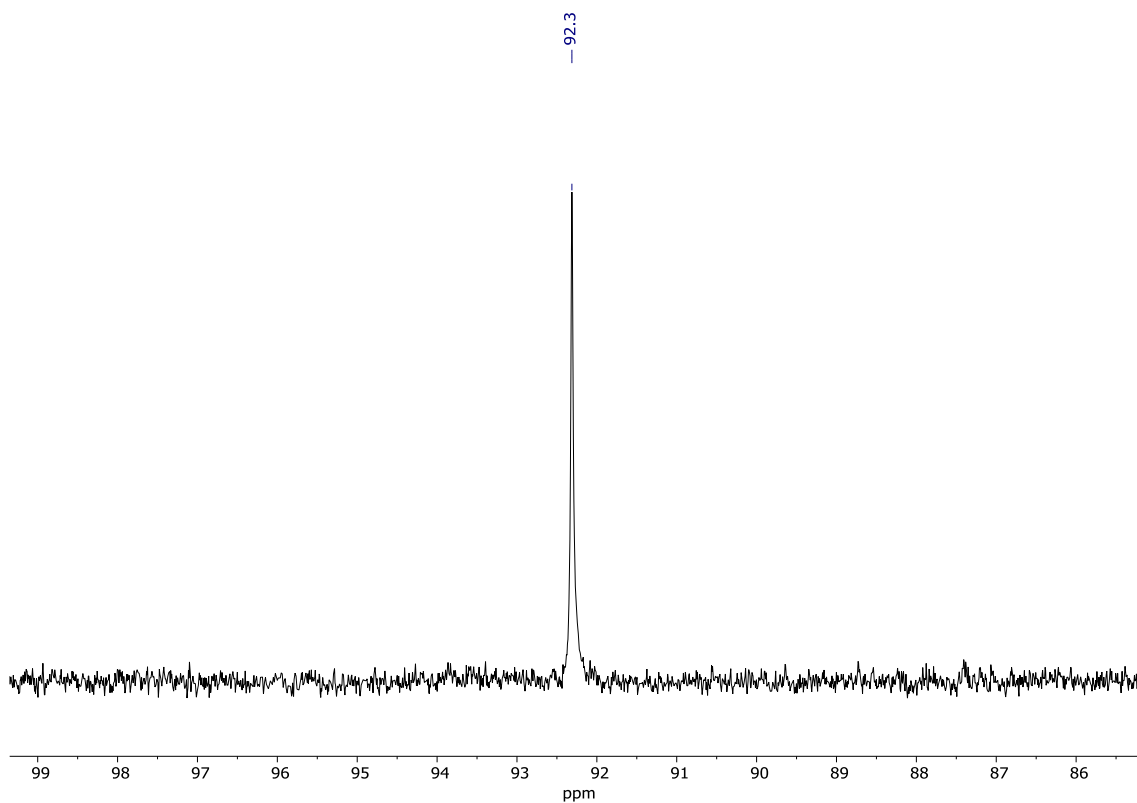



**Figure S15.**  $^{11}\text{B}\{^1\text{H}\}$  NMR (128 MHz,  $\text{tol-}d_8$ ,  $-20\text{ }^\circ\text{C}$ ) for the reaction of complex **2** with  $\text{H}_2$  (1 bar  $\text{H}_2$ ,  $25\text{ }^\circ\text{C}$ , 24 h).

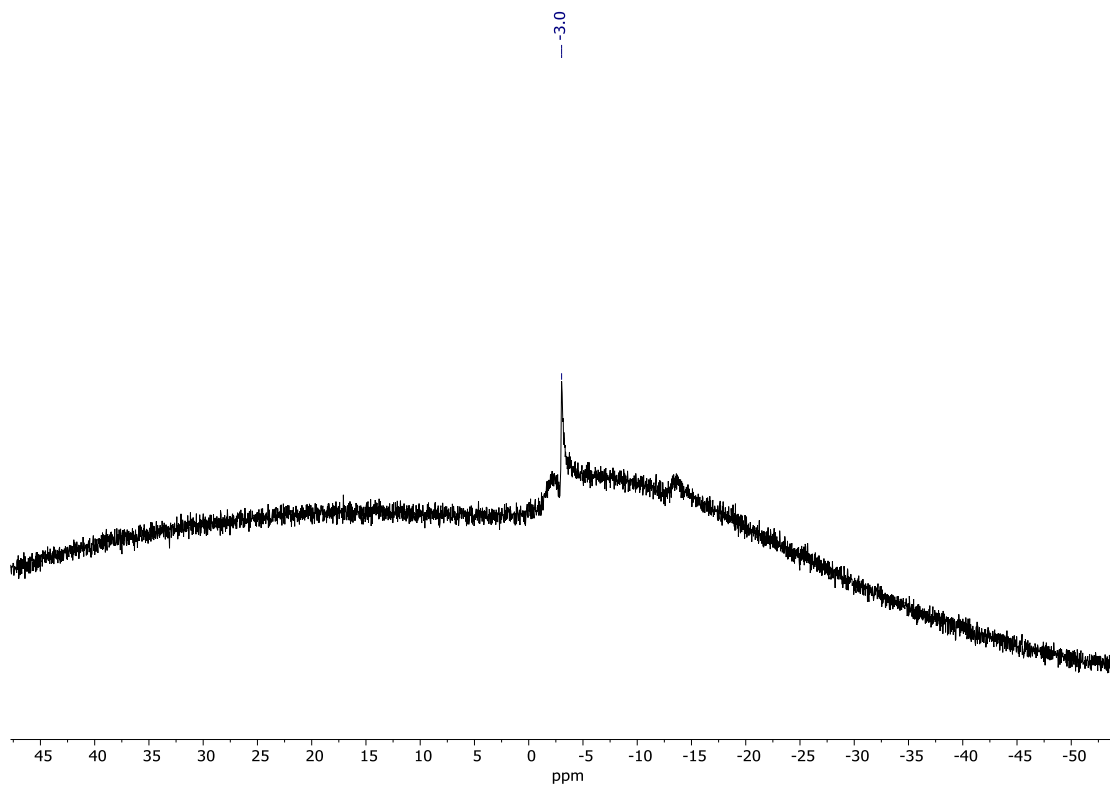

**Figure S16.**  $^1\text{H}$  NMR (400 MHz,  $\text{tol-}d_8$ ,  $-20\text{ }^\circ\text{C}$ ) for the reaction of complex **2** with  $\text{H}_2$  (1 bar  $\text{H}_2$ ,  $25\text{ }^\circ\text{C}$ , 24 h).

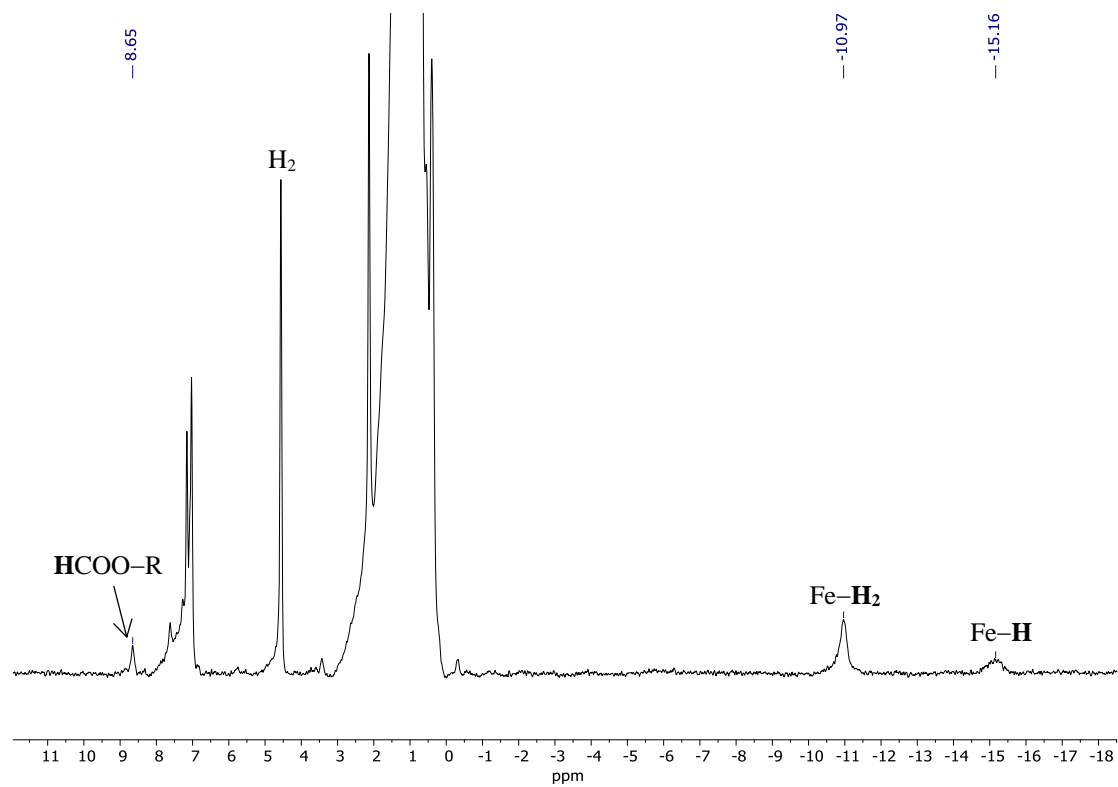

**Figure S17.** IR spectrum (neat) for the reaction of complex **2** with H<sub>2</sub>

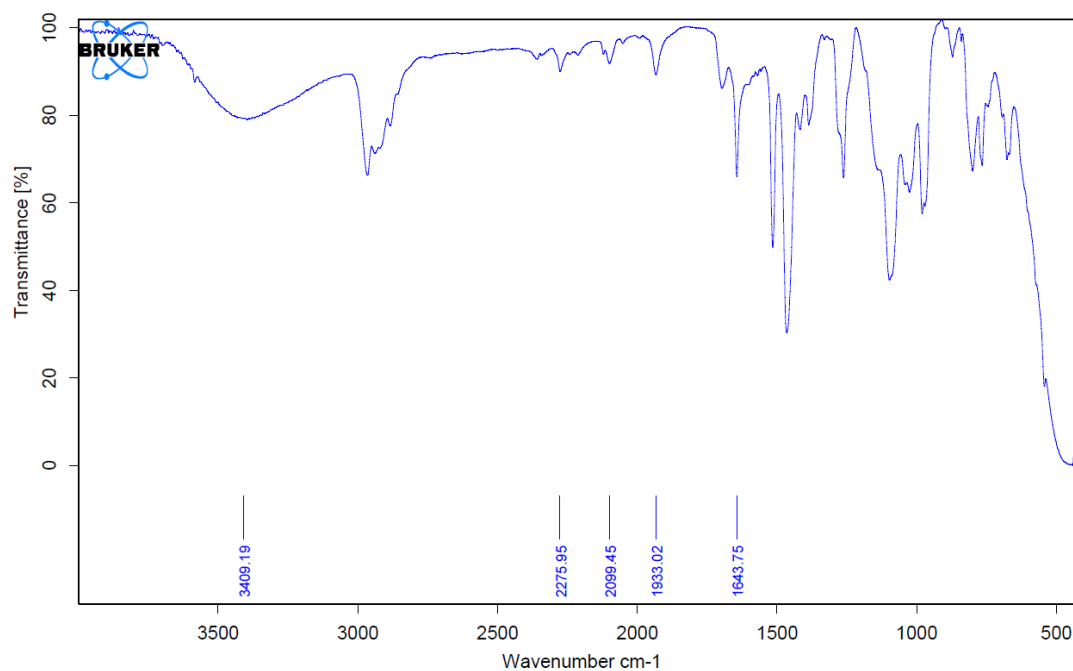

**Figure S18.** <sup>31</sup>P{<sup>1</sup>H} NMR (160 MHz, tol-*d*<sub>8</sub>, -20 °C) for the reaction of complex **3** with H<sub>2</sub> (1 bar H<sub>2</sub>, 25 °C, 24 h).

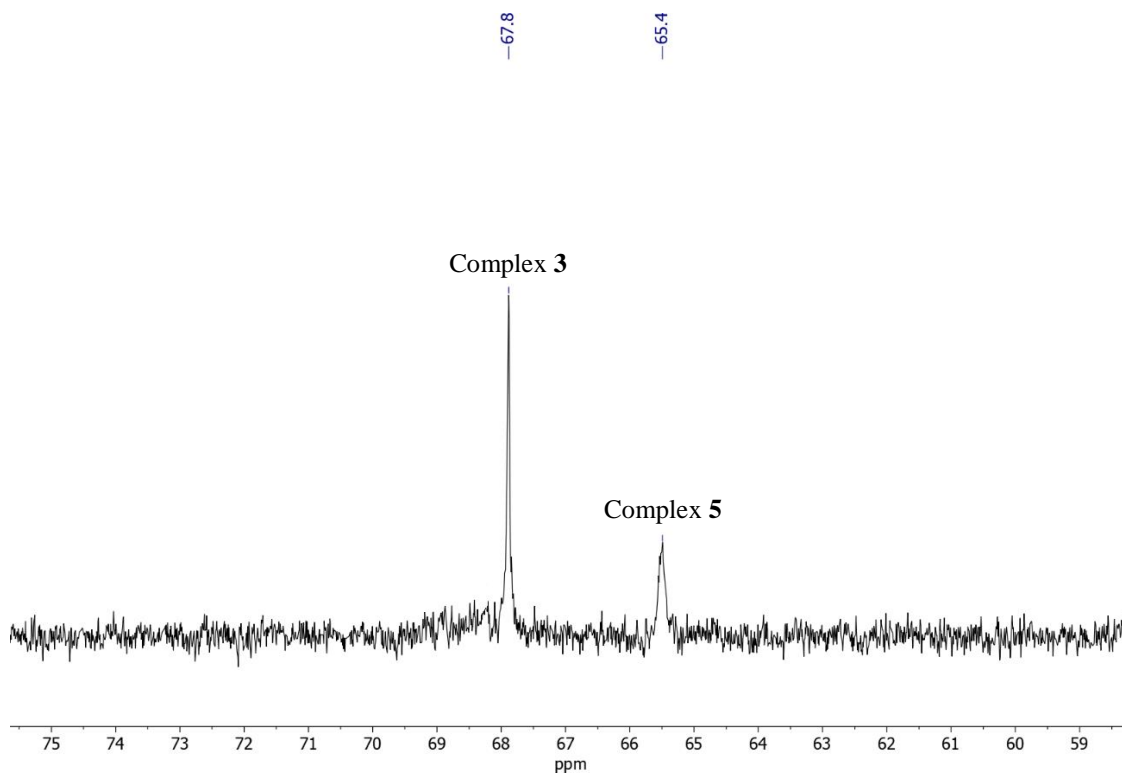

**Figure S19.**  $^1\text{H}$  NMR (400 MHz,  $\text{tol-}d_8$ ,  $-20\text{ }^\circ\text{C}$ ) for the reaction of complex **3** with  $\text{H}_2$  (1 bar  $\text{H}_2$ ,  $25\text{ }^\circ\text{C}$ , 24 h).

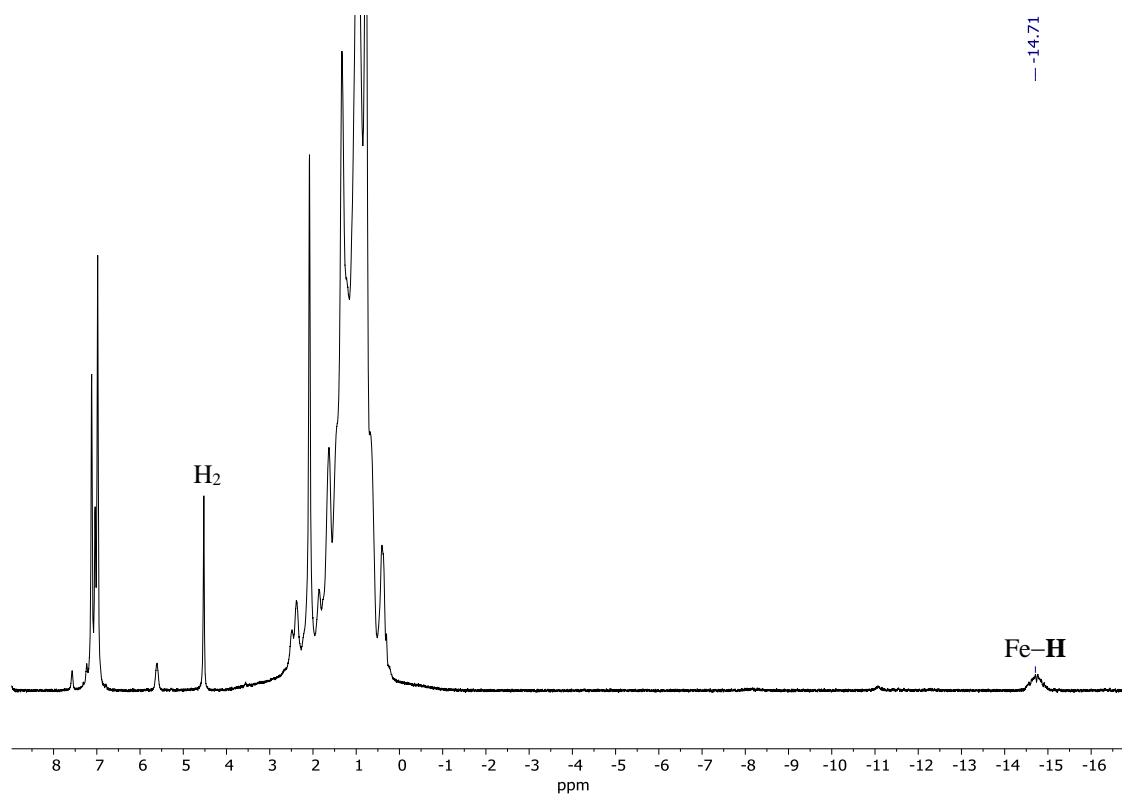

**Figure S20.** IR spectrum (neat) for the reaction of complex **3** with  $\text{H}_2$

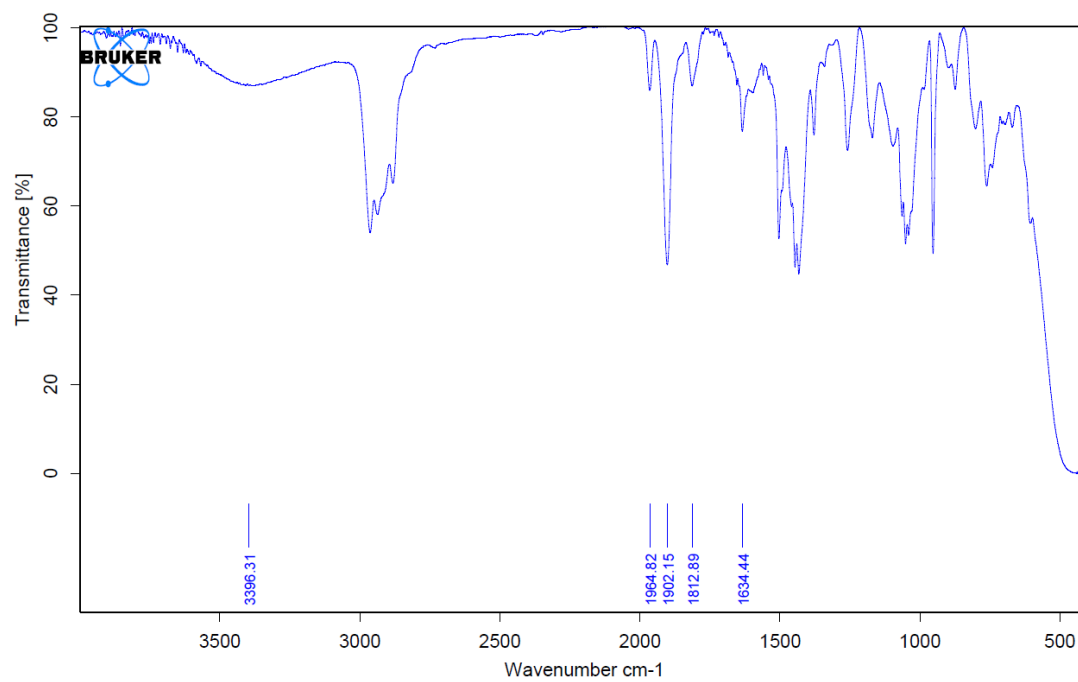

**Figure S21.**  $^{31}\text{P}\{^1\text{H}\}$  NMR (160 MHz,  $\text{CD}_2\text{Cl}_2$ ,  $-20\text{ }^\circ\text{C}$ ) for: a) compound **3**, b) reaction of compound **3** with  $\text{H}_2$  in  $\text{CD}_2\text{Cl}_2$  (1 bar  $\text{H}_2$ ,  $25\text{ }^\circ\text{C}$ , 24 h).

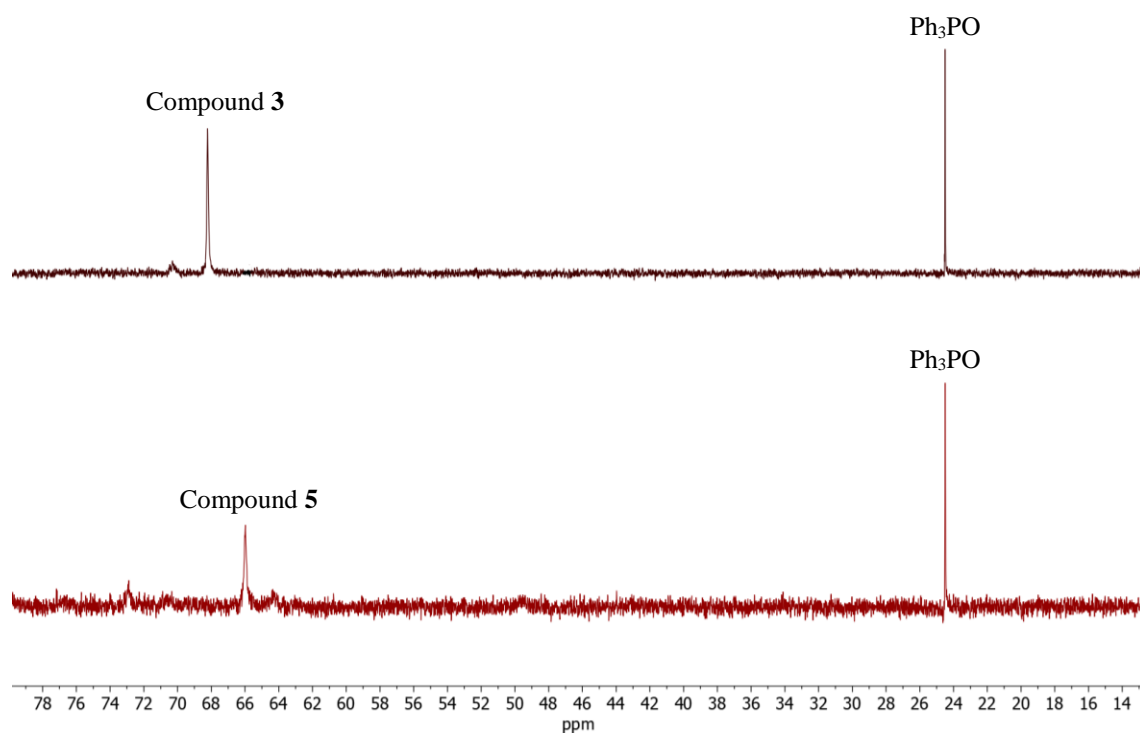

**Figure S22.**  $^{31}\text{P}\{^1\text{H}\}$  NMR (160 MHz,  $\text{C}_6\text{D}_6$ ,  $25\text{ }^\circ\text{C}$ ) for compound **6**

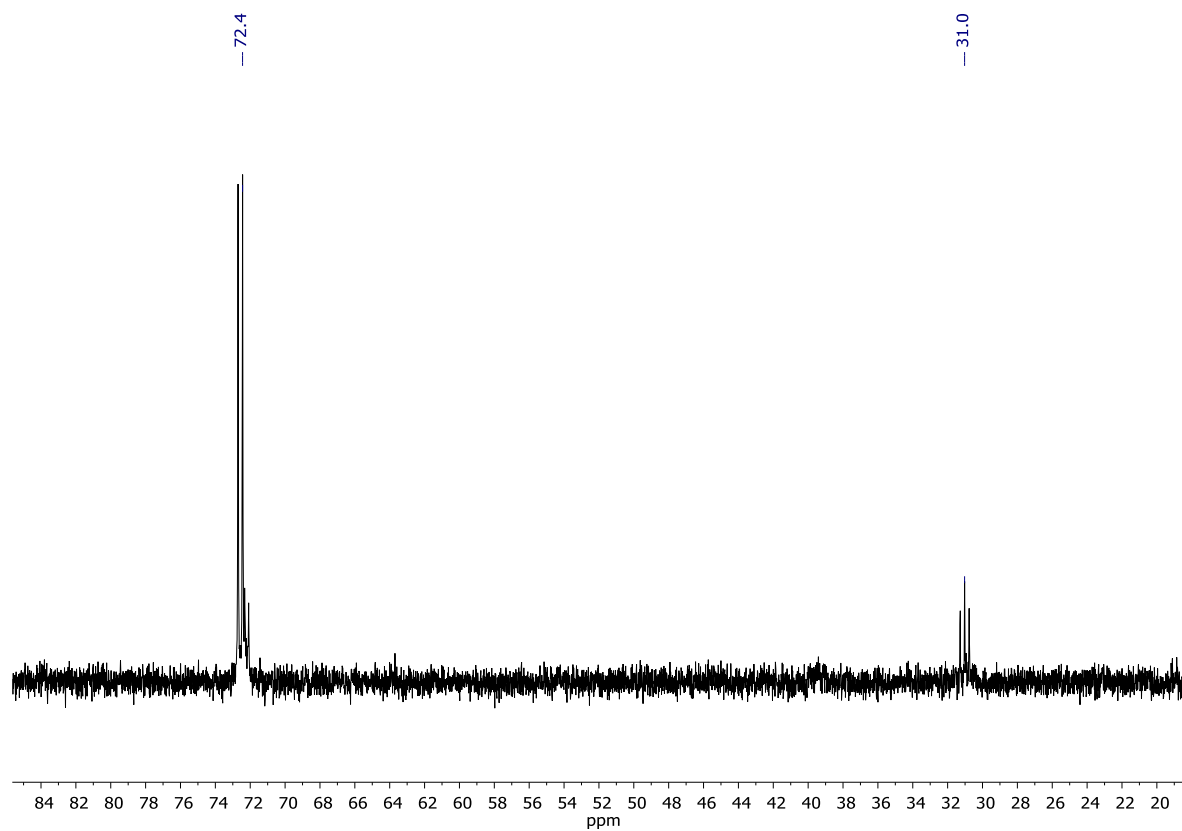

**Figure S23.**  $^1\text{H}$  NMR (400 MHz,  $\text{C}_6\text{D}_6$ , 25  $^\circ\text{C}$ ) for compound **6**

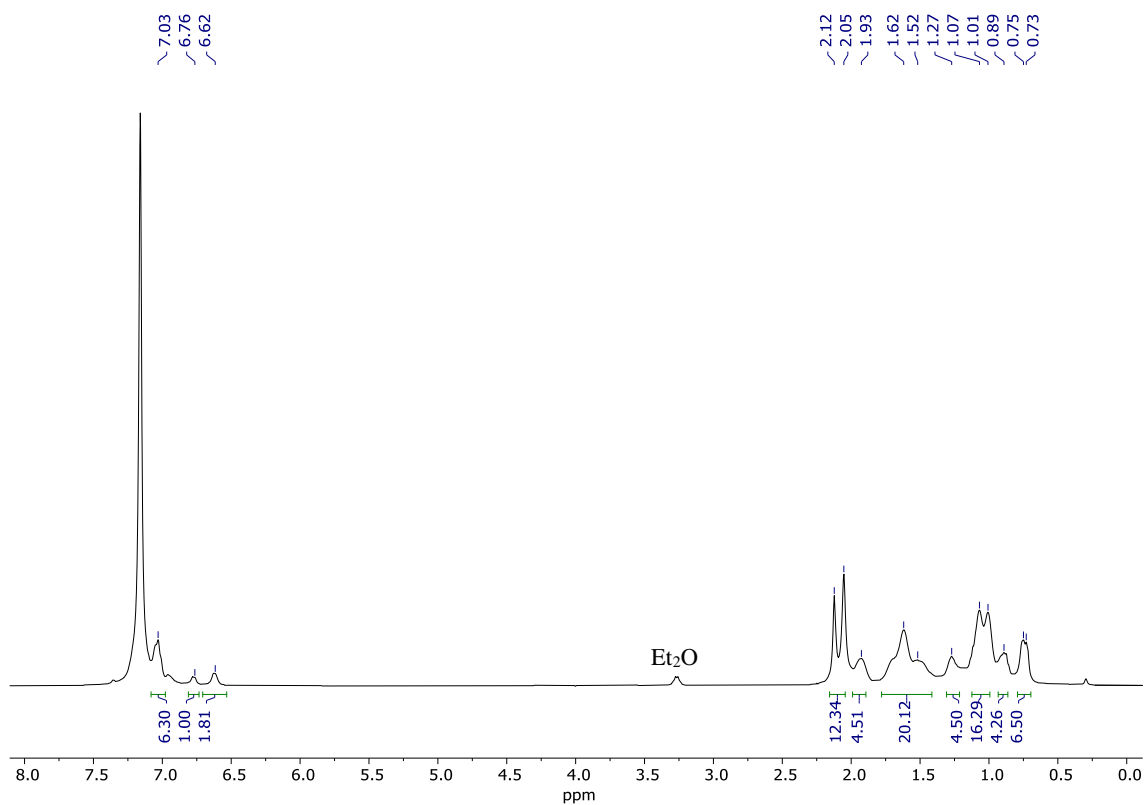

**Figure S24.** IR spectrum (Nujol) for compound **6**

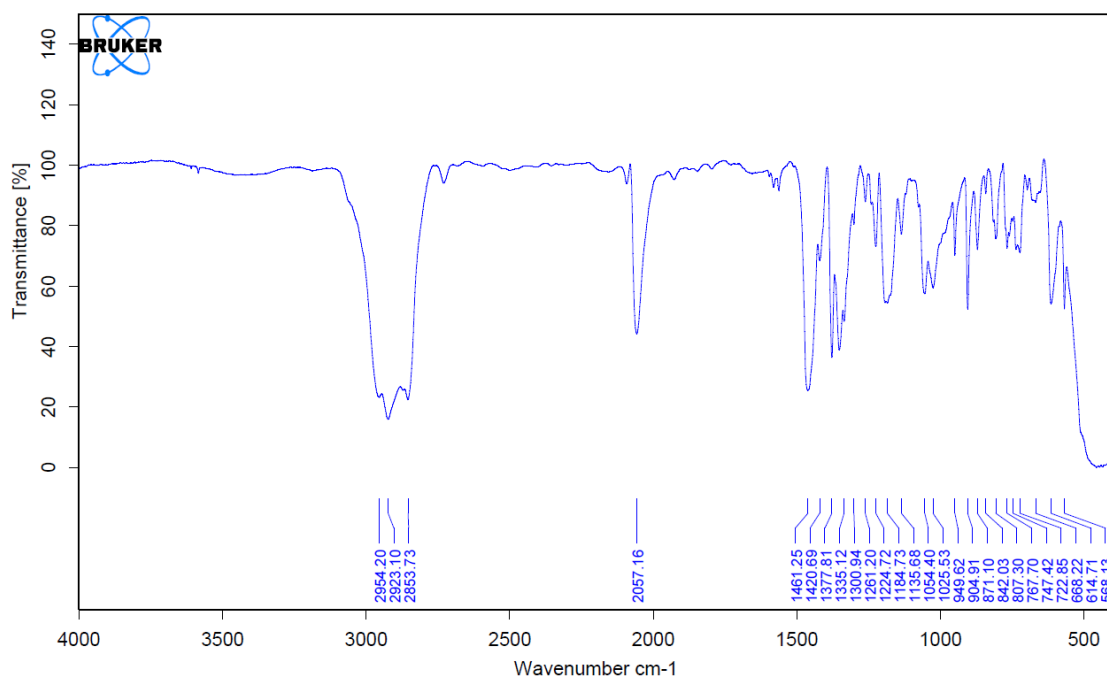

**Figure S25.**  $^{31}\text{P}\{^1\text{H}\}$  NMR (160 MHz, *thf-d*<sub>8</sub>, -20 °C) for compound **7**

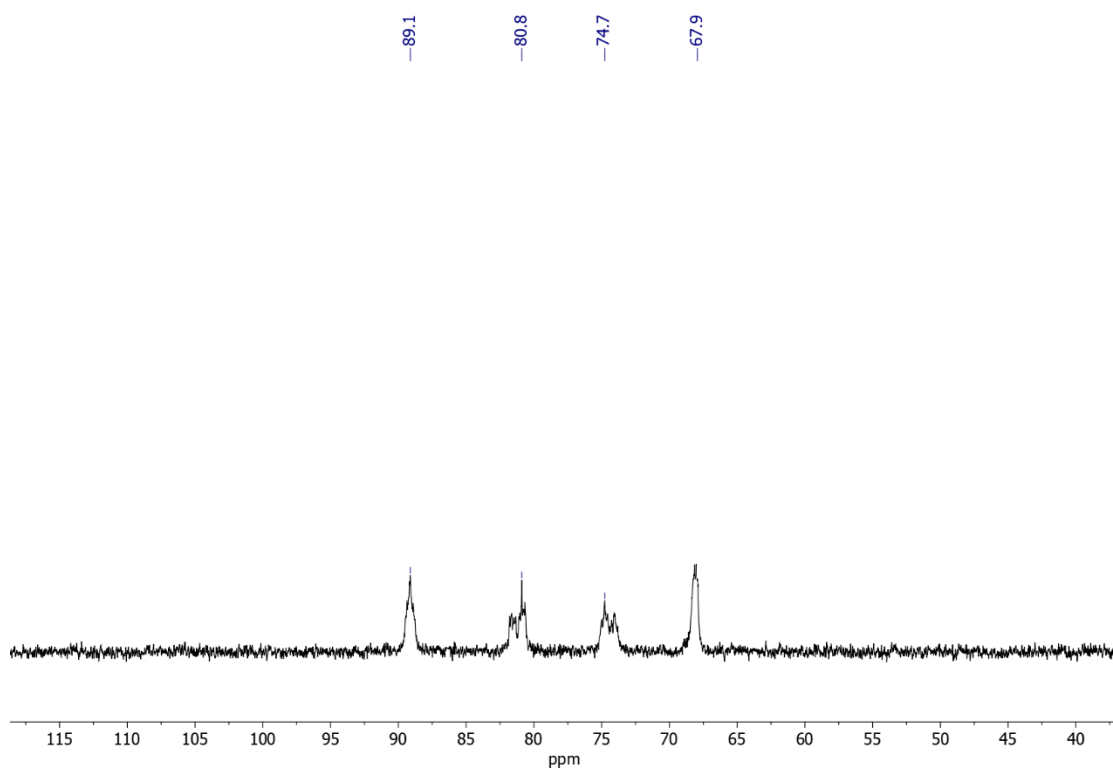

**Figure S26.**  $^{31}\text{P}\{^1\text{H}\}$  NMR (160 MHz, *thf-d*<sub>8</sub>, 25 °C) for compound **7**

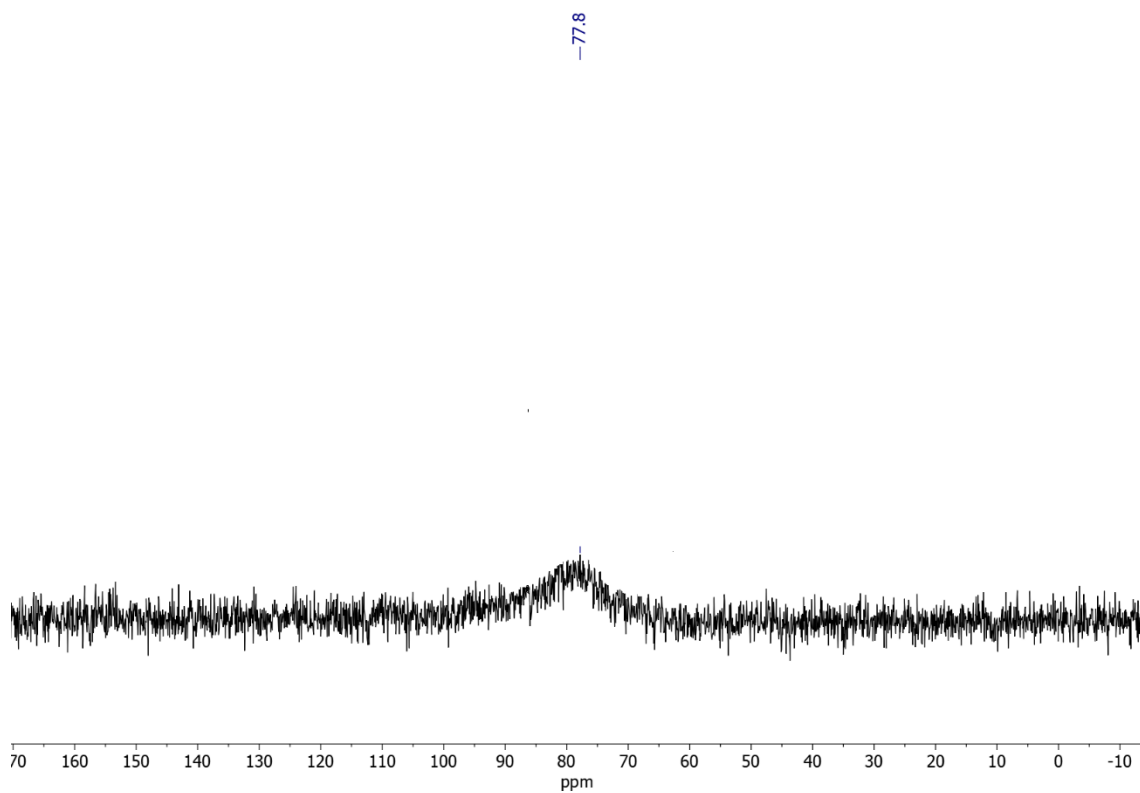

**Figure S27.**  $^1\text{H}$  NMR (400 MHz,  $\text{thf-}d_8$ ,  $-20\text{ }^\circ\text{C}$ ) for compound **7**

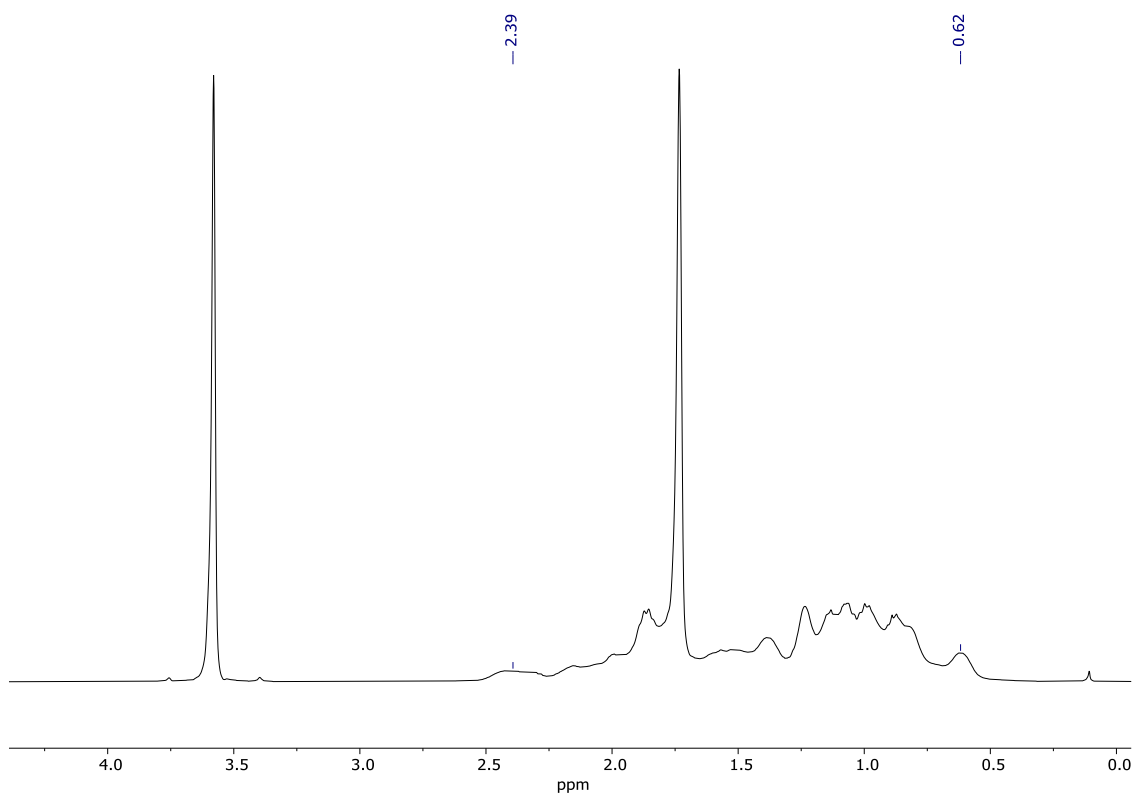

**Figure S28.**  $^{19}\text{F}\{^1\text{H}\}$  NMR (377 MHz,  $\text{thf-}d_8$ ,  $-20\text{ }^\circ\text{C}$ ) for compound **7**

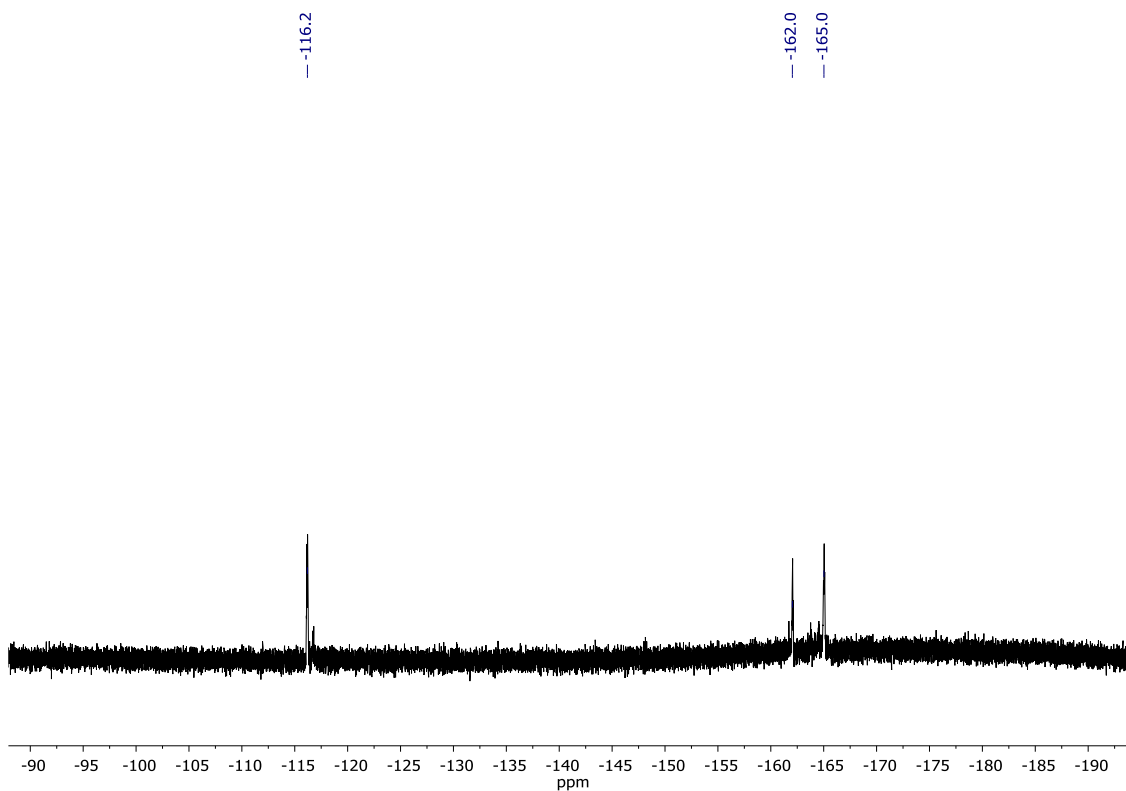

**Figure S29.** IR spectrum (solid) for compound **7**

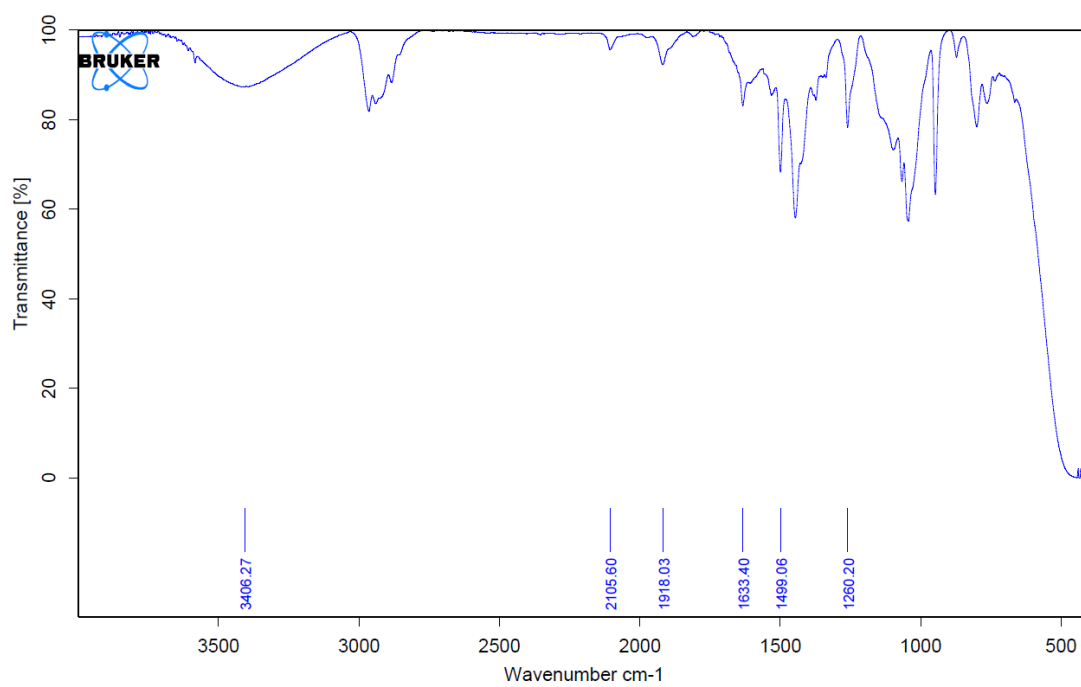

**Figure S30.** <sup>31</sup>P{<sup>1</sup>H} NMR (160 MHz, C<sub>6</sub>D<sub>6</sub>, 25 °C) for the mixture of [Fe(N<sub>2</sub>)(depe)<sub>2</sub>] (●) and compound **8** (●).

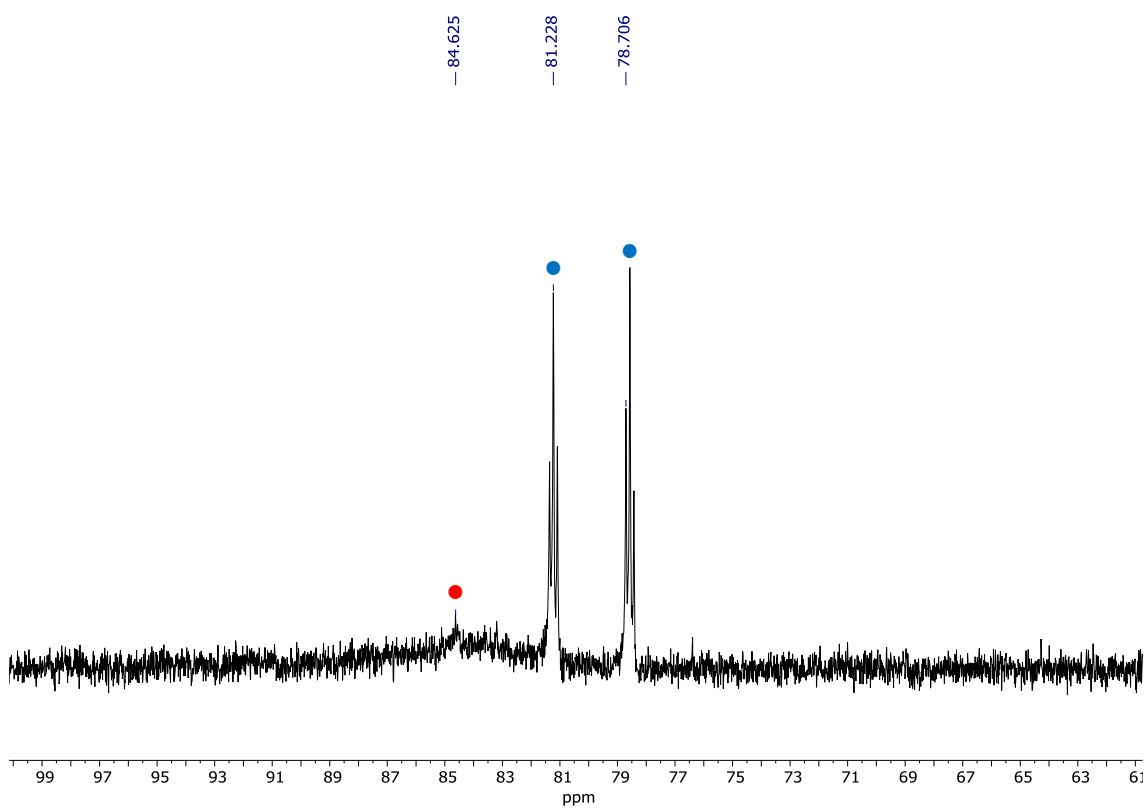



**Figure S31.**  $^1\text{H}$  NMR (400 MHz,  $\text{C}_6\text{D}_6$ , 25  $^\circ\text{C}$ ) for the mixture of  $[\text{Fe}(\text{N}_2)(\text{depe})_2]$  and compound **8**.

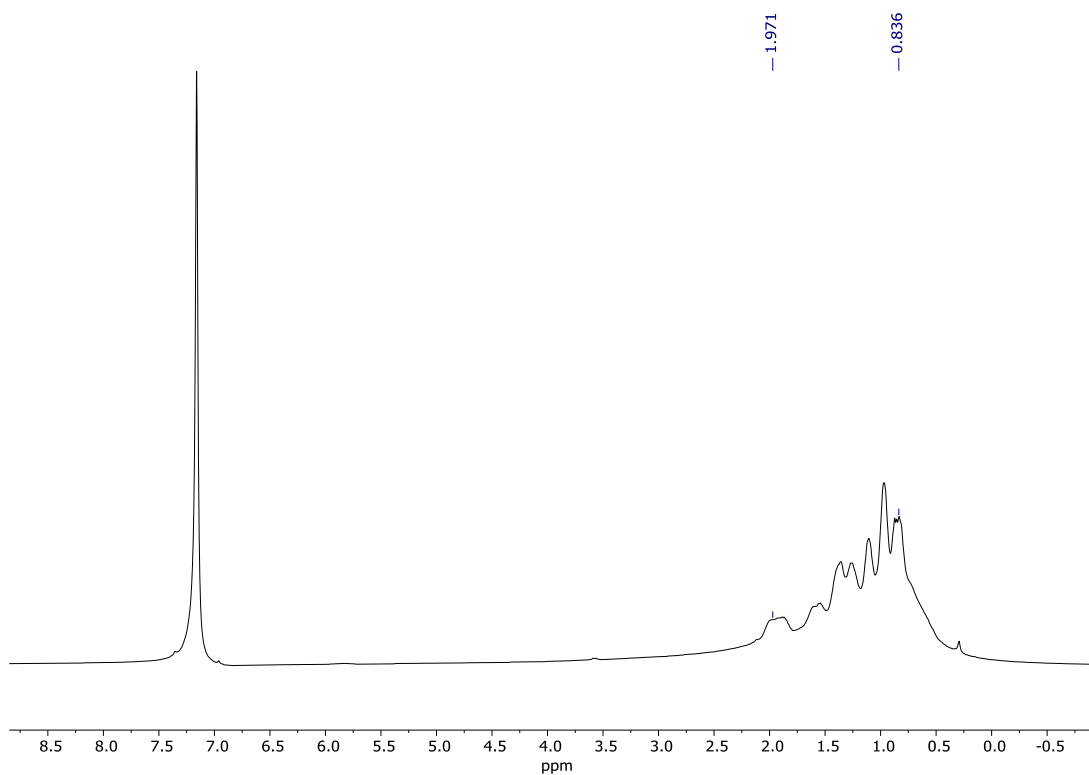

**Figure S32.**  $^{19}\text{F}\{^1\text{H}\}$  NMR (377 MHz,  $\text{C}_6\text{D}_6$ , 25  $^\circ\text{C}$ ) for the mixture of  $[\text{Fe}(\text{N}_2)(\text{depe})_2]$  (●) and compound **8** (●).

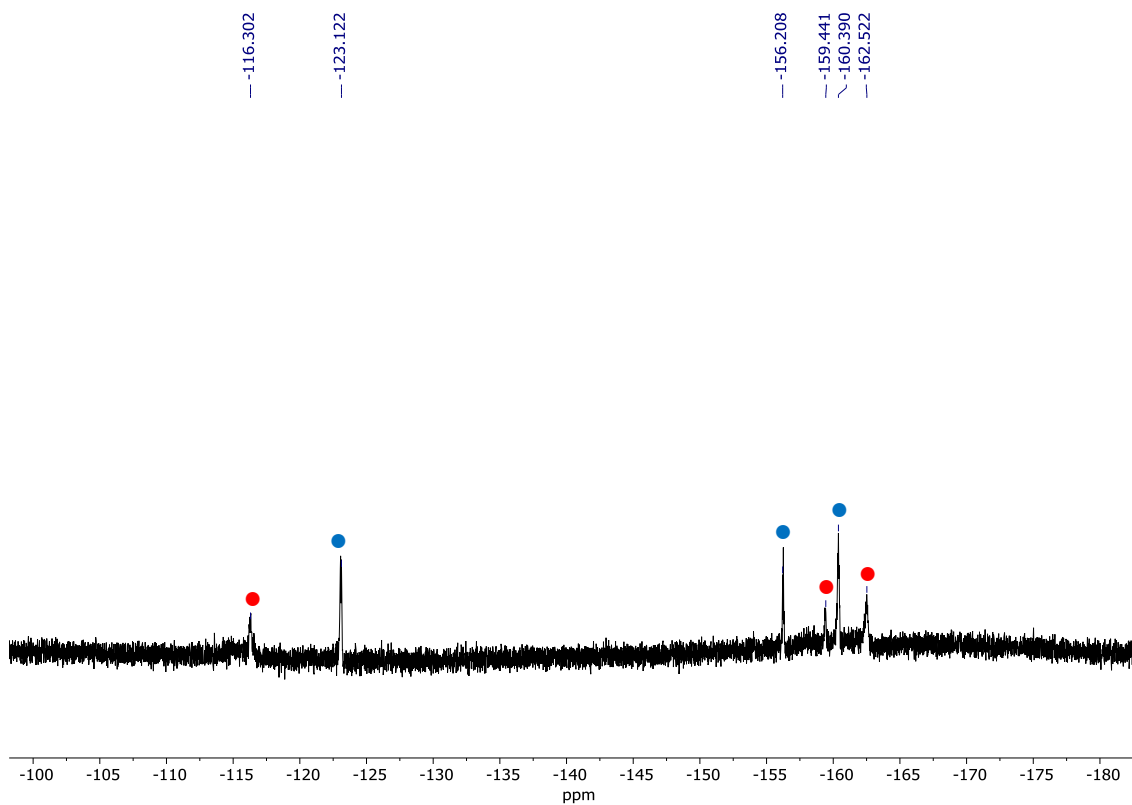

**Figure S33.**  $^{13}\text{C}\{^1\text{H}\}$  NMR (126 MHz,  $\text{C}_6\text{D}_6$ , 25 °C) for the mixture of  $[\text{Fe}(\text{N}_2)(\text{depe})_2]$  and compound **8**.

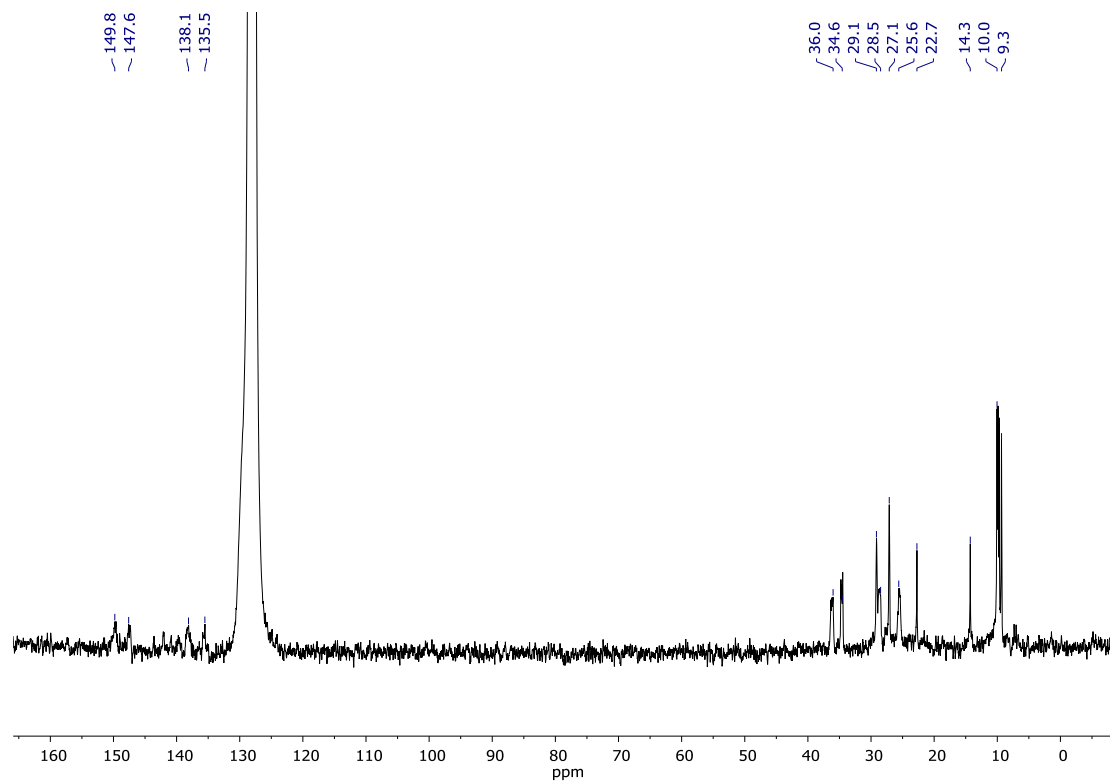

## 5. Variable temperature experiments

**Figure S34.** Variable temperature  $^{31}\text{P}\{^1\text{H}\}$  NMR spectra for the equilibrium process between  $[(\text{depe})_2\text{Fe}(\text{N}_2)]$  (●) and compound **8** (●) in  $\text{thf-}d_8$ .

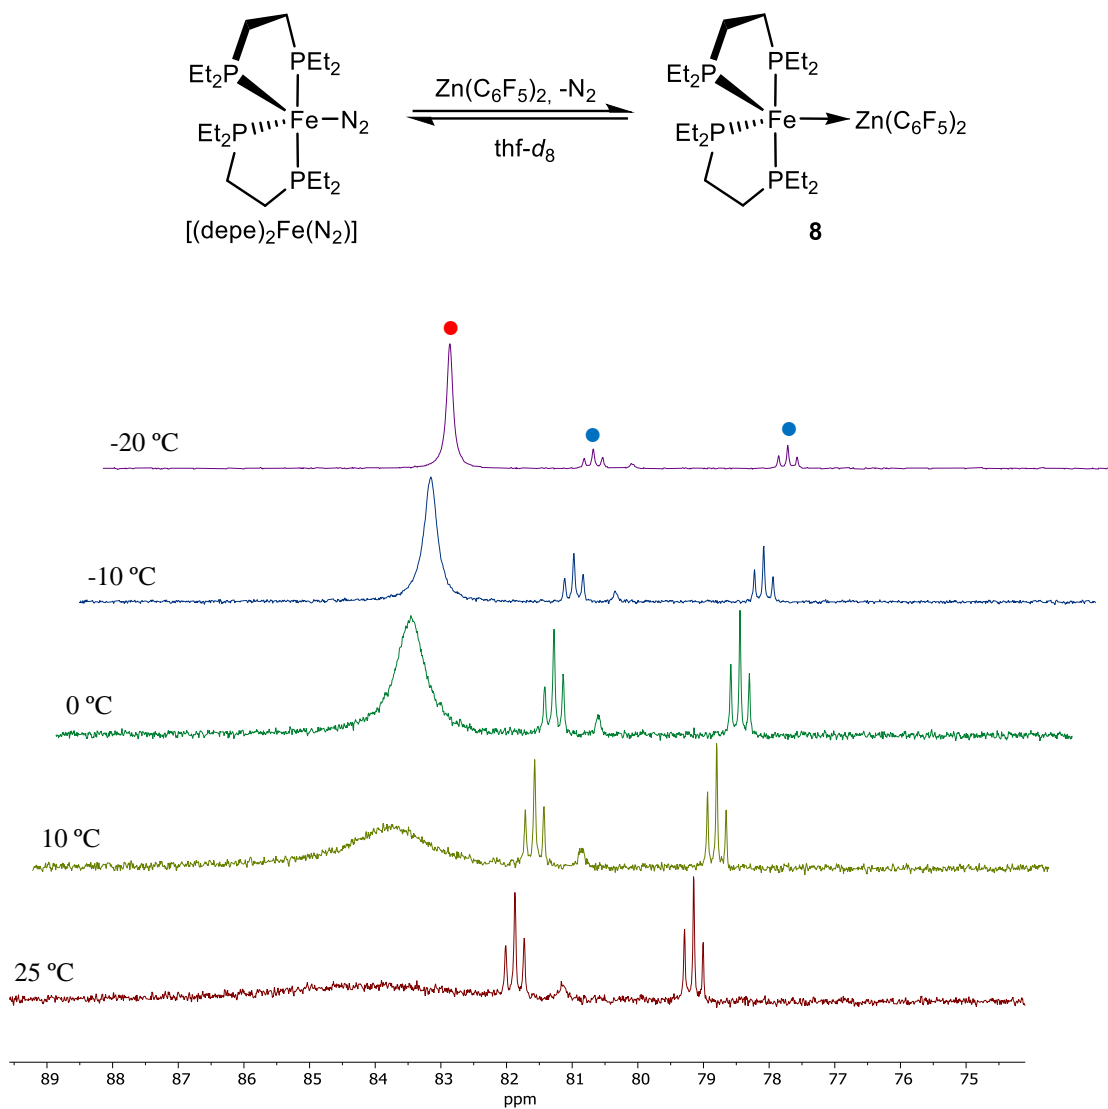

**Figure S35.** Van't Hoff plot for the equilibrium process over the temperature range -20 °C to 25 °C.

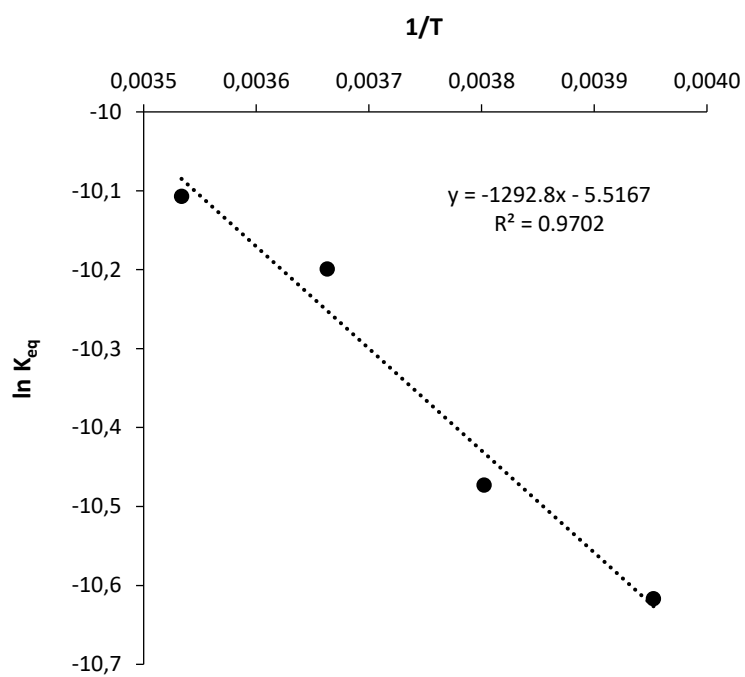

$$\Delta H^0 = 2.6 \text{ kcal}\cdot\text{mol}^{-1}; \Delta S^0 = -11.0 \text{ cal}\cdot\text{mol}^{-1}\cdot\text{K}^{-1}$$

## 6. Crystal structure determinations

Single crystals of suitable size, coated with dry perfluoropolyether or FOMBLIN oil were mounted on a glass fiber and fixed in a cold nitrogen stream [ $T = 193 \text{ K}$ ] to the goniometer head. Data collection was performed on a Bruker D8 Quest APEX-III CCD area detector PhotonIII using monochromatic radiation  $\lambda$  (Mo  $K\alpha_1$ ) = 0.71073 Å by a I $\mu$ S 3.0 microfocus X-ray source. Data collections were processed with APEX-W2D-NT (Bruker, 2004), cell refinement and data reduction with SAINT-Plus (Bruker, 2004) and the absorption was corrected by multiscan method applied by SADABS.<sup>7</sup> The space-group assignment was based upon systematic absences, E statistics, and successful refinement of the structure. The structure was solved by direct methods and expanded through successive difference Fourier maps,  $F^2$  (SHELXTL).<sup>8</sup> In the last cycles of refinement, ordered non-hydrogen atoms were refined anisotropically. Hydrogen atoms connected to carbon atoms were included in idealized positions and a riding model was used for their refinement.

|                                                     | <b>2</b>                                                                         | <b>3</b>                                                                          | <b>6</b>                                                                                                                                           |
|-----------------------------------------------------|----------------------------------------------------------------------------------|-----------------------------------------------------------------------------------|----------------------------------------------------------------------------------------------------------------------------------------------------|
| Formula                                             | C <sub>39</sub> H <sub>48</sub> BF <sub>15</sub> FeO <sub>2</sub> P <sub>4</sub> | C <sub>54</sub> H <sub>63</sub> AlF <sub>15</sub> FeO <sub>2</sub> P <sub>4</sub> | C <sub>138</sub> H <sub>117</sub> Au <sub>3</sub><br>F <sub>18</sub> Fe <sub>3</sub> N <sub>9</sub> O <sub>12</sub> P <sub>15</sub> S <sub>6</sub> |
| fw                                                  | 1024.31                                                                          | 1235.75                                                                           | 3911.24                                                                                                                                            |
| Crystal size, mm                                    | 0.1x0.1x0.1                                                                      | 0.08x0.04x0.03                                                                    | 0.08x0.01x0.01                                                                                                                                     |
| Crystal system                                      | monoclinic                                                                       | triclinic                                                                         | orthorhombic                                                                                                                                       |
| Space group                                         | C 1 c 1                                                                          | P -1                                                                              | P n m a                                                                                                                                            |
| a, Å                                                | 14.7572(5)                                                                       | 11.580(2)                                                                         | 19.1095(5)                                                                                                                                         |
| b, Å                                                | 14.9776(5)                                                                       | 12.520(2)                                                                         | 62.9956(16)                                                                                                                                        |
| c, Å                                                | 20.2694(7)                                                                       | 21.393(4)                                                                         | 13.9182(4)                                                                                                                                         |
| α, deg                                              | 90                                                                               | 73.425(4)                                                                         | 90                                                                                                                                                 |
| β, deg                                              | 102.6370(10)                                                                     | 86.006(5)                                                                         | 90                                                                                                                                                 |
| γ, deg                                              | 90                                                                               | 73.472(4)                                                                         | 90                                                                                                                                                 |
| V, Å <sup>3</sup>                                   | 4371.6(3)                                                                        | 2849.6(9)                                                                         | 16754.9(8)                                                                                                                                         |
| T, K                                                | 193.0                                                                            | 193.0                                                                             | 193.0                                                                                                                                              |
| Z                                                   | 4                                                                                | 2                                                                                 | 4                                                                                                                                                  |
| ρ <sub>calc</sub> , g·cm <sup>-3</sup>              | 1.556                                                                            | 1.440                                                                             | 1.551                                                                                                                                              |
| μ, mm <sup>-1</sup><br>(MoKα)                       | 0.590                                                                            | 0.481                                                                             | 3.163                                                                                                                                              |
| F (000)                                             | 2096                                                                             | 1.440                                                                             | 7848                                                                                                                                               |
| Absorption<br>correction                            | multi-scan<br>0.6956-0.7456                                                      | multi-scan<br>0.6352-0.7453                                                       | multi-scan<br>0.6371-0.7454                                                                                                                        |
| θ range, deg                                        | 2.059-27.898                                                                     | 1.987-25.790                                                                      | 1.839-26.376                                                                                                                                       |
| No. of rflns<br>measd                               | 10319                                                                            | 10897                                                                             | 17297                                                                                                                                              |
| R <sub>int</sub>                                    | 0.0489                                                                           | 0.2019                                                                            | 0.0759                                                                                                                                             |
| No. of rflns<br>unique                              | 10319                                                                            | 10897                                                                             | 17297                                                                                                                                              |
| No. of<br>params/restraints                         | 567/2                                                                            | 702/8                                                                             | 981/148                                                                                                                                            |
| R1 (I > 2σ(I))                                      | 0.0326                                                                           | 0.1065                                                                            | 0.0746                                                                                                                                             |
| R1 (all data)                                       | 0.0428                                                                           | 0.1675                                                                            | 0.1040                                                                                                                                             |
| wR2 (I > 2σ(I))                                     | 0.0675                                                                           | 0.2779                                                                            | 0.1742                                                                                                                                             |
| wR2 (all data)                                      | 0.0727                                                                           | 0.3129                                                                            | 0.1901                                                                                                                                             |
| Diff. Fourier<br>peaks min/max,<br>eÅ <sup>-3</sup> | -0.267/0.287                                                                     | -0.717/1.125                                                                      | -2.896/1.735                                                                                                                                       |
| CCDC number                                         | 2172177                                                                          | 2172178                                                                           | 2172179                                                                                                                                            |

|                                                  | 8                                                                   | 7                                                                                                                                    |
|--------------------------------------------------|---------------------------------------------------------------------|--------------------------------------------------------------------------------------------------------------------------------------|
| Formula                                          | C <sub>32</sub> H <sub>48</sub> F <sub>10</sub> FeP <sub>4</sub> Zn | C <sub>33</sub> H <sub>48</sub> F <sub>10</sub> Fe N <sub>2</sub> O <sub>2</sub> P <sub>4</sub> Zn,<br>C <sub>6</sub> H <sub>6</sub> |
| fw                                               | 867.80                                                              | 1017.94                                                                                                                              |
| Crystal size, mm                                 | 0.1x0.1x0.1                                                         | 0.1x0.1x0.1                                                                                                                          |
| Crystal system                                   | monoclinic                                                          | monoclinic                                                                                                                           |
| Space group                                      | C 1 2/c 1                                                           | P 1 21 1                                                                                                                             |
| a, Å                                             | 17.5085(16)                                                         | 13.453(3)                                                                                                                            |
| b, Å                                             | 11.3314(16)                                                         | 10.7351(19)                                                                                                                          |
| c, Å                                             | 20.086(3)                                                           | 17.039(3)                                                                                                                            |
| α, deg                                           | 90                                                                  | 90                                                                                                                                   |
| β, deg                                           | 111.281(6)                                                          | 110.225(7)                                                                                                                           |
| γ, deg                                           | 90                                                                  | 90                                                                                                                                   |
| V, Å <sup>3</sup>                                | 3713.2(8)                                                           | 2309.1(8)                                                                                                                            |
| T, K                                             | 193.0                                                               | 193.0                                                                                                                                |
| Z                                                | 4                                                                   | 2                                                                                                                                    |
| ρ <sub>calc</sub> , g·cm <sup>-3</sup>           | 1.552                                                               | 1.464                                                                                                                                |
| μ, mm <sup>-1</sup> (MoKα)                       | 1.282                                                               | 1.047                                                                                                                                |
| F(000)                                           | 1784                                                                | 1048                                                                                                                                 |
| Absorption correction                            | multi-scan<br>0.6694-0.7454                                         | multi-scan<br>0.5387-0.7455                                                                                                          |
| θ range, deg                                     | 2.176-25.350                                                        | 2.285-25.654                                                                                                                         |
| No. of rflns measd                               | 3417                                                                | 8426                                                                                                                                 |
| R <sub>int</sub>                                 | 0.1746                                                              | 0.1381                                                                                                                               |
| No. of rflns unique                              | 3417                                                                | 8426                                                                                                                                 |
| No. of params/restraints                         | 222/0                                                               | 541/1                                                                                                                                |
| R1 (I > 2σ(I))                                   | 0.0418                                                              | 0.0916                                                                                                                               |
| R1 (all data)                                    | 0.0812                                                              | 0.1754                                                                                                                               |
| wR2 (I > 2σ(I))                                  | 0.0829                                                              | 0.1753                                                                                                                               |
| wR2 (all data)                                   | 0.1044                                                              | 0.2193                                                                                                                               |
| Diff. Fourier peaks<br>min/max, eÅ <sup>-3</sup> | -0.489/0.810                                                        | -0.868/1.660                                                                                                                         |
| CCDC number                                      | 2172176                                                             | 2172175                                                                                                                              |

**Figure S36.** ORTEP structure of complex **8**. Hydrogen atoms have been excluded for clarity. Thermal ellipsoids are set at 50% probability. Selected bond distances (Å) and angles (°): Zn1–Fe1, 2.5607(12); Fe1–P1, 2.2426(11); Fe1–P2, 2.2426(12); Fe1–Zn1–C1, 129.88(12); C1–Zn1–C1, 100.2(2); P1–Fe1–Zn1, 89.87(4); P2–Fe1–Zn1, 125.79(3).

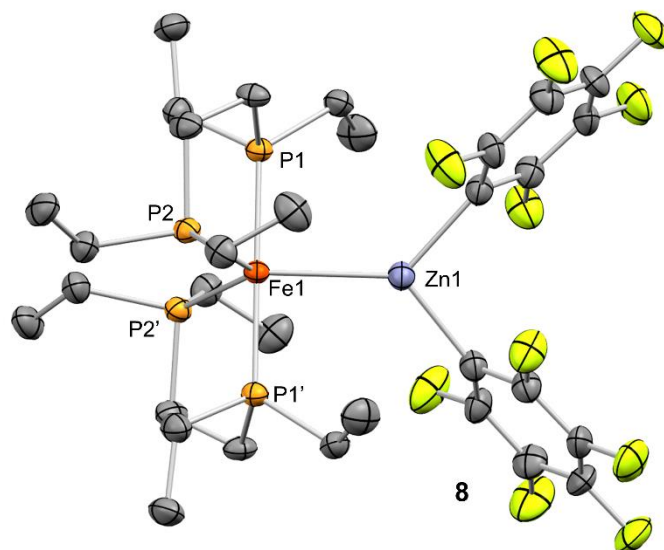

**Figure S37.** ORTEP structure of complex **2**. Hydrogen atoms have been excluded for clarity. Thermal ellipsoids are set at 50% probability. Selected bond distances (Å) and angles (°): Fe1–O2, 2.121(2); Fe1–C21, 1.861(3); C21–O2, 1.249(4); C21–O1, 1.305(4); O1–B1, 1.531(4); C21–Fe1–O2, 35.81(11); C21–O1–B1, 126.8(3); C21–O2–Fe1, 60.64(17).

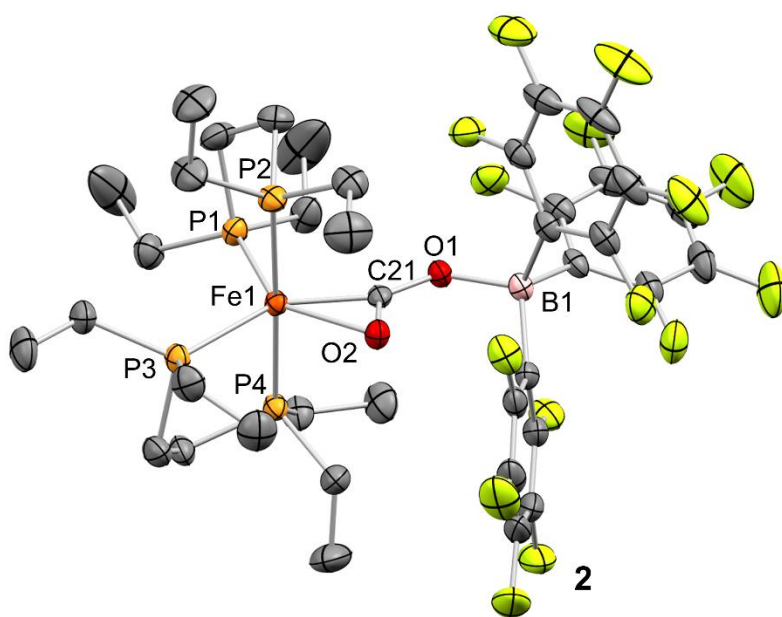



**Figure S38.** ORTEP structure of complex **3**. Hydrogen atoms have been excluded for clarity. Thermal ellipsoids are set at 50% probability. Selected bond distances (Å) and angles (°): Fe1–O1, 2.007(6); Fe1–C21, 1.724(10); C21–O2, 1.164(11); Al1–O1, 1.685(6); O2–C21–Fe1, 176.5(11); C21–Fe1–O1, 176.9(4); Fe1–O1–Al1, 171.9(4).

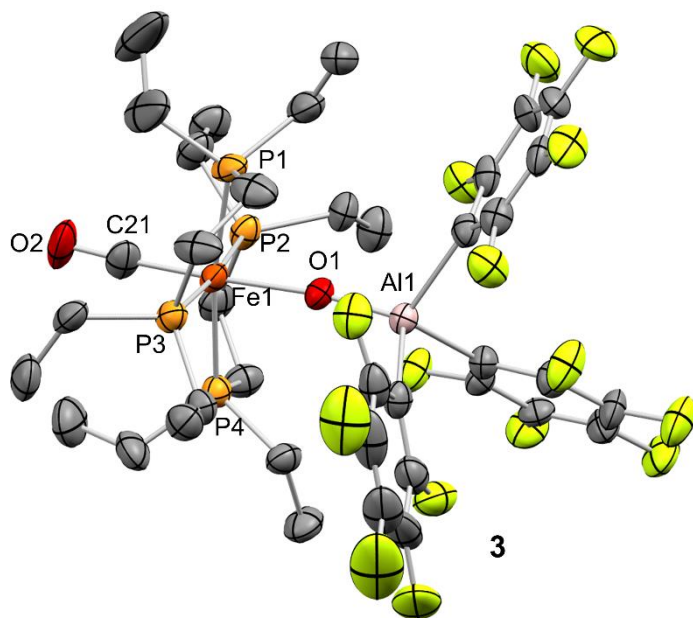

**Figure S39.** ORTEP structure of complex **6**. Hydrogen atoms have been excluded for clarity. Thermal ellipsoids are set at 50% probability. Selected bond distances (Å) and angles (°): N1–N2, 1.121(13); N1–Fe1, 1.827(10); Fe1–Au1, 2.5299(14); N2–N1–Fe1, 176.7(11); N1–Fe1–Au1, 178.0(4); Fe1–Au1–P1, 165.24(7).

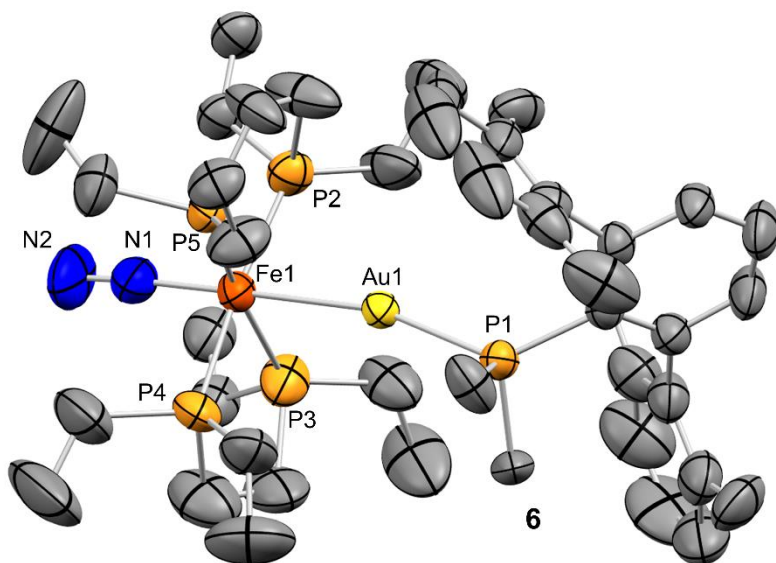

**Figure S40.** ORTEP structure of complex **7**. Hydrogen atoms have been excluded for clarity. Thermal ellipsoids are set at 50% probability. Selected bond distances (Å) and angles (°): N2–N1, 1.066(16); N1–Fe1, 1.862(14); Fe1–C21, 1.93(2); C21–O1, 1.27(2); C21–O2, 1.31(2); O1–Zn1, 2.106(10); O2–Zn1, 2.072(10); N2–N1–Fe1, 175.7(19); N1–Fe1–C21, 177.0(8); Fe1–C21–O1, 124.5(14); Fe1–C21–O2, 121.7(13); C21–O1–Zn1, 91.8(11); C21–O2–Zn1, 92.1(10); O1–Zn1–O2, 62.2(5).

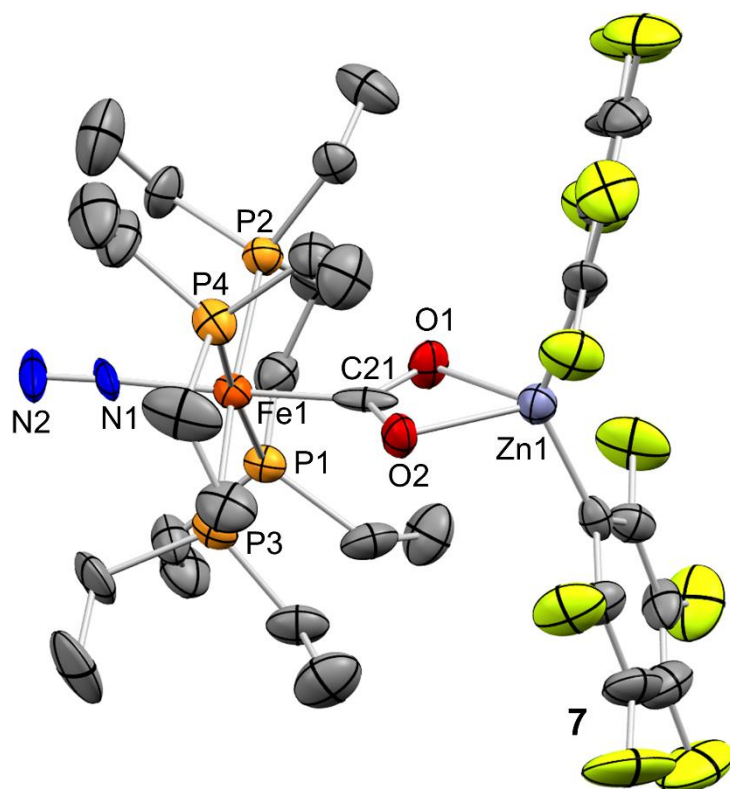

## 7. Computational details

Geometry optimizations of the complexes were performed using the Gaussian09<sup>9</sup> suite of programs at the BP86<sup>10</sup>/def2-SVP<sup>11</sup> level of theory using the D3 dispersion correction suggested by Grimme et al.<sup>12</sup> Reactants and adducts were characterized by frequency calculations, and have positive definite Hessian matrices. Transition states (TS's) show only one negative eigenvalue in their diagonalized force constant matrices, and their associated eigenvectors were confirmed to correspond to the motion along the reaction coordinate under consideration using the Intrinsic Reaction Coordinate (IRC) method.<sup>13</sup> Energy refinements were carried out through single-point calculations at the same DFT level using the much larger triple- $\zeta$  basis-set def2-TZVPP<sup>3</sup> and including solvent effects (solvent = toluene) with the Polarization Continuum Model (PCM) method.<sup>14</sup> This level is denoted PCM(toluene)-BP86-D3/def2-TZVPP//BP86-D3/def2-SVP.

The interaction between the selected fragments in complexes Fe(depe)<sub>2</sub>(N<sub>2</sub>) and **6**+ has been investigated with the Energy Decomposition Analysis (EDA)<sup>15</sup> in combination with Natural Orbitals for Chemical Valence (NOCV)<sup>16</sup> method. Within this approach, the interaction energy can be decomposed into the following physically meaningful terms:

$$\Delta E_{\text{int}} = \Delta E_{\text{elstat}} + \Delta E_{\text{Pauli}} + \Delta E_{\text{orb}} + \Delta E_{\text{disp}}$$

The term  $\Delta E_{\text{elstat}}$  corresponds to the classical electrostatic interaction between the unperturbed charge distributions of the deformed reactants and is usually attractive. The Pauli repulsion  $\Delta E_{\text{Pauli}}$  comprises the destabilizing interactions between occupied orbitals and is responsible for any steric repulsion. The orbital interaction  $\Delta E_{\text{orb}}$  accounts for charge transfer (interaction between occupied orbitals on one moiety with unoccupied orbitals on the other, including HOMO-LUMO interactions) and polarization (empty-occupied orbital mixing on one fragment due to the presence of another fragment). Finally, the  $\Delta E_{\text{disp}}$  term takes into account the interactions which are due to dispersion forces.

The EDA-NOCV calculations were carried out using the BP86-D3/def2-TZVPP optimized geometries with the program package ADF 2020<sup>17</sup> using the same functional (BP86-D3) in conjunction with a triple- $\zeta$ -quality basis set using uncontracted Slater-type orbitals (STOs) augmented by two sets of polarization function with a frozen-core approximation for the core electrons.<sup>18</sup> An auxiliary set of s, p, d, f, and g STOs were used to fit the molecular densities and to represent the Coulomb and exchange potentials accurately in each SCF cycle.<sup>19</sup> Scalar relativistic effects were incorporated by applying the zeroth-order regular approximation (ZORA).<sup>20</sup> This level of theory is denoted ZORA-BP86-D3/TZ2P//BP86-D3/def2-SVP.

**Table S1.** EDA-NOCV results (in kcal/mol, ZORA-BP86-D3/TZ2P//BP86-D3/def2-SVP level) for complexes Fe(depe)<sub>2</sub>(N<sub>2</sub>) and **6+**.

|                                     | Fe(depe) <sub>2</sub> (N <sub>2</sub> ) | [(N <sub>2</sub> )-<br>Fe(depe) <sub>2</sub> (Au)] <sup>+</sup> | [(N <sub>2</sub> )Fe(depe) <sub>2</sub> -<br>(Au)] <sup>+</sup> |
|-------------------------------------|-----------------------------------------|-----------------------------------------------------------------|-----------------------------------------------------------------|
|                                     | Fe-N <sub>2</sub> bond                  |                                                                 | (N <sub>2</sub> )Fe-(Au+) bond                                  |
| DE <sub>int</sub>                   | -56.5                                   | -40.9                                                           | -120.4                                                          |
| DE <sub>Pauli</sub>                 | 154.9                                   | 140.7                                                           | 191.3                                                           |
| DE <sub>elstat</sub>                | -92.1                                   | -83.1                                                           | -175.0                                                          |
| DE <sub>orb</sub>                   | -109.6                                  | -92.1                                                           | -100.0                                                          |
| DE <sub>orb</sub> (r <sub>1</sub> ) | -42.8                                   | -28.2                                                           | -68.4                                                           |
| DE <sub>orb</sub> (r <sub>2</sub> ) | -27.2                                   | -27.2                                                           |                                                                 |
| DE <sub>orb</sub> (r <sub>3</sub> ) | -26.9                                   | -25.9                                                           |                                                                 |
| DE <sub>disp</sub>                  | -9.6                                    | -6.4                                                            | -36.7                                                           |
| r(Fe...L) / Å <sup>a</sup>          | 1.766 (1.749) <sup>a</sup>              | 1.785 (1.834)                                                   | 2.580 (2.530)                                                   |
| r(N-N) / Å <sup>a</sup>             | 1.154 (1.139)                           | 1.143 (1.113)                                                   |                                                                 |

<sup>a</sup> Values within parenthesis refer to experimental values.

As stated in the main text, we performed additional calculations using [Fe]<sup>2+</sup> and [Au]<sup>(-1)</sup> as fragments, which is consistent with the relative electronegativities of iron and gold. The computed NBO-charges are not conclusive in that regard: q(Au) = -0.07 and q(Fe) = +0.27. Therefore, we computed the alternative EDA using the aforesaid fragmentation. Table S2 contains the corresponding EDA values:

**Table S2.** EDA-NOCV results (in kcal/mol, ZORA-BP86-D3/TZ2P//BP86-D3/def2-SVP level) for complex **6+**.

|                      | [(N <sub>2</sub> )Fe(depe) <sub>2</sub> -(Au)] <sup>+</sup> |                                                   |
|----------------------|-------------------------------------------------------------|---------------------------------------------------|
|                      | [Fe] <sup>(q=0)</sup> and [Au] <sup>(q=+1)</sup>            | [Fe] <sup>(q=+2)</sup> and [Au] <sup>(q=-1)</sup> |
| DE <sub>int</sub>    | -120.4                                                      | -267.5                                            |
| DE <sub>Pauli</sub>  | 191.3                                                       | 212.7                                             |
| DE <sub>elstat</sub> | -175.0                                                      | -271.6                                            |
| DE <sub>orb</sub>    | -100.0                                                      | -171.8                                            |
| DE <sub>disp</sub>   | -36.7                                                       | -36.7                                             |

From the data in the above table, it can be concluded that the [Fe]<sup>(q=0)</sup>/Au<sup>(q=+1)</sup> fragmentation better describes the bonding in **6+** rather than the [Fe]<sup>(q=+2)</sup>/[Au]<sup>(q=-1)</sup>. This is based on the magnitude of the DE<sub>orb</sub> term, which is lower in the former fragmentation scheme. According to the literature, the calculation that gives the smallest orbital term DE<sub>orb</sub> and thus, the smallest change in the electronic structure of the fragments by the bond formation, indicates the more useful description of the bond.<sup>21</sup>

Cartesian coordinates (in Å) and total energies (in a. u., non corrected zero-point vibrational energy included) of all species discussed in the text (PCM(toluene)-BP86-D3/def2-TZVPP//BP86/def2-SVP level).

**1:** E= -3609.8000928

|    |              |              |              |
|----|--------------|--------------|--------------|
| Fe | -0.033835000 | -0.094335000 | -0.358509000 |
| P  | -0.299042000 | 1.711525000  | 0.799487000  |
| P  | 2.074835000  | 0.572011000  | -0.649869000 |
| P  | 0.366566000  | -1.717855000 | 1.100565000  |
| P  | -2.141366000 | -0.721236000 | -0.201423000 |
| O  | -0.670724000 | 1.435908000  | -2.872037000 |
| O  | -0.030720000 | -0.731102000 | -2.351613000 |
| C  | -1.128963000 | 3.111647000  | -0.148377000 |
| H  | -1.000095000 | 2.819304000  | -1.213352000 |
| H  | -2.215723000 | 3.015488000  | 0.062854000  |
| C  | -0.659355000 | 4.556292000  | 0.067837000  |
| H  | -0.751856000 | 4.901342000  | 1.117483000  |
| H  | -1.259162000 | 5.248322000  | -0.561423000 |
| H  | 0.399966000  | 4.692417000  | -0.234431000 |
| C  | -1.170002000 | 1.737339000  | 2.464799000  |
| H  | -2.138816000 | 1.214713000  | 2.313252000  |
| H  | -0.565841000 | 1.063943000  | 3.109409000  |
| C  | -1.402655000 | 3.085597000  | 3.156184000  |
| H  | -1.868456000 | 2.941290000  | 4.154636000  |
| H  | -2.083225000 | 3.734889000  | 2.568668000  |
| H  | -0.456018000 | 3.643391000  | 3.312547000  |
| C  | 2.262240000  | 2.315996000  | 0.019468000  |
| H  | 3.324855000  | 2.570306000  | 0.216678000  |
| H  | 1.905384000  | 2.985997000  | -0.792901000 |
| C  | 2.709367000  | 0.777844000  | -2.395087000 |
| H  | 1.911301000  | 1.340441000  | -2.924092000 |
| H  | 3.602363000  | 1.439627000  | -2.346940000 |
| C  | 3.017831000  | -0.535360000 | -3.124043000 |
| H  | 3.803386000  | -1.129886000 | -2.610454000 |
| H  | 3.380936000  | -0.331589000 | -4.153366000 |
| H  | 2.099421000  | -1.150151000 | -3.200381000 |

|   |              |              |              |
|---|--------------|--------------|--------------|
| C | 3.508015000  | -0.330784000 | 0.161594000  |
| H | 3.253310000  | -0.397911000 | 1.240757000  |
| H | 3.443303000  | -1.368241000 | -0.228221000 |
| C | 4.923761000  | 0.223928000  | -0.033161000 |
| H | 5.666796000  | -0.394940000 | 0.513689000  |
| H | 5.024353000  | 1.262559000  | 0.345319000  |
| H | 5.222429000  | 0.227730000  | -1.101291000 |
| C | -1.229838000 | -2.634116000 | 1.559138000  |
| H | -1.322444000 | -3.491882000 | 0.858349000  |
| H | -1.163061000 | -3.060031000 | 2.583180000  |
| C | -2.416408000 | -1.682310000 | 1.388361000  |
| H | -2.454035000 | -0.935856000 | 2.210616000  |
| H | -3.395033000 | -2.208370000 | 1.379781000  |
| C | -2.600249000 | -1.958523000 | -1.522167000 |
| H | -2.470739000 | -1.415670000 | -2.480604000 |
| H | -1.770940000 | -2.696156000 | -1.515544000 |
| C | -3.971188000 | -2.632136000 | -1.423374000 |
| H | -4.085118000 | -3.222165000 | -0.489425000 |
| H | -4.122819000 | -3.333792000 | -2.271113000 |
| H | -4.802625000 | -1.897337000 | -1.457649000 |
| C | -3.604015000 | 0.440901000  | -0.204501000 |
| H | -4.503503000 | -0.119451000 | 0.134633000  |
| H | -3.396480000 | 1.197043000  | 0.582739000  |
| C | -3.839725000 | 1.113922000  | -1.563992000 |
| H | -4.588980000 | 1.928599000  | -1.478178000 |
| H | -4.225358000 | 0.387994000  | -2.309612000 |
| H | -2.903267000 | 1.538197000  | -1.979514000 |
| C | 1.428318000  | -3.180484000 | 0.586749000  |
| H | 2.486569000  | -2.889654000 | 0.755655000  |
| H | 1.227572000  | -4.043939000 | 1.258254000  |
| C | 1.190300000  | -3.529121000 | -0.886437000 |
| H | 0.164373000  | -3.923027000 | -1.048031000 |
| H | 1.901597000  | -4.302365000 | -1.244878000 |
| H | 1.279967000  | -2.623669000 | -1.520659000 |
| C | 1.029349000  | -1.320900000 | 2.817390000  |
| H | 1.798409000  | -0.534273000 | 2.665578000  |

|   |              |              |              |
|---|--------------|--------------|--------------|
| H | 0.179848000  | -0.808532000 | 3.318620000  |
| C | 1.568832000  | -2.462745000 | 3.684801000  |
| H | 1.845913000  | -2.098813000 | 4.697343000  |
| H | 2.474743000  | -2.923825000 | 3.240769000  |
| H | 0.818886000  | -3.270505000 | 3.820729000  |
| C | -0.361629000 | 0.496551000  | -2.133766000 |
| C | 1.371317000  | 2.446386000  | 1.256264000  |
| H | 1.287959000  | 3.492628000  | 1.616148000  |
| H | 1.764501000  | 1.833838000  | 2.097344000  |

**B(C<sub>6</sub>F<sub>5</sub>)<sub>3</sub>: E= -2209.252418**

|   |              |              |              |
|---|--------------|--------------|--------------|
| F | -3.582717000 | 3.181884000  | -1.428942000 |
| F | -2.209201000 | -1.280915000 | 1.435591000  |
| F | -4.769978000 | -0.421059000 | 1.433252000  |
| F | -5.470277000 | 1.806536000  | 0.001791000  |
| F | -1.012554000 | 2.349910000  | -1.432401000 |
| F | -0.002343000 | 2.559084000  | 1.430229000  |
| F | 2.028067000  | 4.341345000  | 1.427206000  |
| F | 4.306794000  | 3.825503000  | -0.001967000 |
| F | 2.536708000  | -0.302269000 | -1.434101000 |
| F | 4.547639000  | 1.501588000  | -1.431197000 |
| F | 1.165395000  | -5.638519000 | -0.000718000 |
| F | -0.956693000 | -4.685892000 | -1.446846000 |
| F | -1.518123000 | -2.042425000 | -1.448649000 |
| F | 2.735735000  | -3.923007000 | 1.445989000  |
| F | 2.202222000  | -1.274042000 | 1.449881000  |
| B | -0.000473000 | 0.001757000  | 0.000000000  |
| C | -1.492174000 | 0.495178000  | 0.001175000  |
| C | -1.901925000 | 1.647236000  | -0.709954000 |
| C | -3.231431000 | 2.097854000  | -0.729787000 |
| C | -4.204581000 | 1.389466000  | 0.001837000  |
| C | -3.843173000 | 0.241520000  | 0.733694000  |
| C | -2.506378000 | -0.187220000 | 0.712929000  |
| C | 1.174016000  | 1.045237000  | -0.001230000 |
| C | 1.093268000  | 2.265868000  | 0.708914000  |
| C | 2.135529000  | 3.206244000  | 0.729111000  |
| C | 3.310119000  | 2.940908000  | -0.001673000 |

|   |              |              |              |
|---|--------------|--------------|--------------|
| C | 3.433794000  | 1.743030000  | -0.732335000 |
| C | 2.376115000  | 0.819969000  | -0.711960000 |
| C | 0.317019000  | -1.537131000 | 0.000534000  |
| C | 1.408736000  | -2.076680000 | 0.719698000  |
| C | 1.704454000  | -3.448997000 | 0.739444000  |
| C | 0.895421000  | -4.333464000 | -0.000330000 |
| C | -0.198113000 | -3.842015000 | -0.739835000 |
| C | -0.471313000 | -2.465055000 | -0.718908000 |

**Al (C<sub>6</sub>F<sub>5</sub>)<sub>3</sub>: E= -2426.8700527**

|    |              |              |              |
|----|--------------|--------------|--------------|
| Al | -0.016909000 | -0.001747000 | 0.002006000  |
| F  | 2.778577000  | -0.691119000 | 1.259143000  |
| F  | 4.182930000  | -3.030815000 | 1.289087000  |
| F  | -0.739543000 | -2.843435000 | -1.128398000 |
| F  | 0.661549000  | -5.185557000 | -1.069978000 |
| F  | 3.118799000  | -5.271106000 | 0.132233000  |
| F  | 3.068856000  | 5.296701000  | -0.130513000 |
| F  | 0.625866000  | 5.181518000  | 1.097924000  |
| F  | -0.753040000 | 2.825722000  | 1.157789000  |
| F  | 4.140820000  | 3.073133000  | -1.312153000 |
| F  | 2.757995000  | 0.719956000  | -1.280259000 |
| F  | -4.783205000 | 0.566407000  | -2.312504000 |
| F  | -4.790531000 | -0.599085000 | 2.300593000  |
| F  | -2.038293000 | -0.586769000 | 2.302334000  |
| F  | -6.143273000 | -0.019831000 | -0.008939000 |
| F  | -2.030600000 | 0.568218000  | -2.301543000 |
| C  | 0.975496000  | -1.689235000 | 0.059738000  |
| C  | 2.241425000  | -1.778275000 | 0.666448000  |
| C  | 2.982891000  | -2.971213000 | 0.701985000  |
| C  | 2.434055000  | -4.126805000 | 0.109003000  |
| C  | 1.167223000  | -4.082536000 | -0.507468000 |
| C  | 0.464605000  | -2.864752000 | -0.518781000 |
| C  | 0.959718000  | 1.694899000  | -0.055491000 |
| C  | 2.217882000  | 1.799058000  | -0.675479000 |
| C  | 2.947948000  | 2.998948000  | -0.712216000 |
| C  | 2.394974000  | 4.145957000  | -0.106495000 |



|   |              |              |              |
|---|--------------|--------------|--------------|
| C | 1.135440000  | 4.086436000  | 0.523510000  |
| C | 0.444258000  | 2.862123000  | 0.535326000  |
| C | -1.977143000 | -0.009048000 | 0.000473000  |
| C | -2.703067000 | 0.283254000  | -1.159820000 |
| C | -4.107938000 | 0.286881000  | -1.192165000 |
| C | -4.808213000 | -0.016424000 | -0.005980000 |
| C | -4.111648000 | -0.316109000 | 1.183303000  |
| C | -2.706627000 | -0.305281000 | 1.157538000  |

**2-A1:** E= -6036.7691607

|    |              |              |              |
|----|--------------|--------------|--------------|
| Fe | 2.318912000  | -0.281921000 | 0.381120000  |
| P  | 2.359104000  | -0.142882000 | 2.547397000  |
| P  | 2.512625000  | 1.950478000  | 0.357276000  |
| P  | 4.380376000  | -0.748281000 | -0.352990000 |
| P  | 2.013253000  | -2.485930000 | 0.291857000  |
| O  | -0.647705000 | 0.031271000  | 0.548971000  |
| F  | -4.389701000 | -1.586215000 | 4.385363000  |
| F  | -5.228722000 | -0.138367000 | -0.835006000 |
| F  | -7.327700000 | -1.017208000 | 0.682658000  |
| F  | -6.906510000 | -1.741695000 | 3.297979000  |
| F  | -2.310297000 | -0.716425000 | 2.889919000  |
| F  | -3.005307000 | -2.784346000 | -0.838698000 |
| F  | -2.072432000 | -4.500968000 | -2.713819000 |
| F  | -0.534306000 | -3.575542000 | -4.784116000 |
| F  | -0.902572000 | 0.837307000  | -3.139757000 |
| F  | 0.047517000  | -0.896624000 | -4.982143000 |
| F  | -1.513713000 | 6.323165000  | -1.131869000 |
| F  | -0.856103000 | 5.133424000  | 1.257975000  |
| F  | -1.425942000 | 2.515398000  | 1.671027000  |
| F  | -2.703323000 | 4.859310000  | -3.120525000 |
| F  | -3.229874000 | 2.214767000  | -2.735809000 |
| O  | 0.860834000  | -0.051933000 | -1.181532000 |
| C  | 0.733672000  | -0.578459000 | 3.379195000  |
| H  | -0.001151000 | -0.595617000 | 2.555691000  |
| H  | 0.838733000  | -1.624781000 | 3.738102000  |
| C  | 0.197526000  | 0.325884000  | 4.494440000  |

|   |              |              |              |
|---|--------------|--------------|--------------|
| H | 0.880338000  | 0.408006000  | 5.365099000  |
| H | -0.770211000 | -0.079071000 | 4.855023000  |
| H | -0.012380000 | 1.347707000  | 4.117546000  |
| C | 3.615891000  | -1.074115000 | 3.572407000  |
| H | 3.513210000  | -2.140009000 | 3.271203000  |
| H | 4.607377000  | -0.744096000 | 3.195889000  |
| C | 3.532834000  | -0.928048000 | 5.097121000  |
| H | 4.345850000  | -1.499329000 | 5.593119000  |
| H | 2.571175000  | -1.310797000 | 5.495401000  |
| H | 3.630787000  | 0.130543000  | 5.415016000  |
| C | 1.996134000  | 2.555950000  | 2.045858000  |
| H | 2.252217000  | 3.625866000  | 2.193113000  |
| H | 0.888989000  | 2.473500000  | 2.082284000  |
| C | 1.397504000  | 2.892685000  | -0.794122000 |
| H | 0.381404000  | 2.489220000  | -0.622959000 |
| H | 1.380749000  | 3.944469000  | -0.434827000 |
| C | 1.741393000  | 2.797832000  | -2.284604000 |
| H | 2.803283000  | 3.044964000  | -2.498076000 |
| H | 1.111591000  | 3.504424000  | -2.863271000 |
| H | 1.528484000  | 1.781679000  | -2.666424000 |
| C | 4.158735000  | 2.821641000  | 0.139770000  |
| H | 4.794277000  | 2.459499000  | 0.976252000  |
| H | 4.619008000  | 2.414570000  | -0.784221000 |
| C | 4.137958000  | 4.354658000  | 0.095431000  |
| H | 5.171613000  | 4.757892000  | 0.052638000  |
| H | 3.651217000  | 4.794193000  | 0.990662000  |
| H | 3.599366000  | 4.732814000  | -0.796807000 |
| C | 4.607626000  | -2.610481000 | -0.603930000 |
| H | 4.346346000  | -2.832600000 | -1.660361000 |
| H | 5.671858000  | -2.896370000 | -0.467198000 |
| C | 3.666884000  | -3.361872000 | 0.340853000  |
| H | 4.027513000  | -3.316506000 | 1.391583000  |
| H | 3.561566000  | -4.435743000 | 0.076407000  |
| C | 1.312109000  | -2.945417000 | -1.369713000 |
| H | 0.312200000  | -2.469083000 | -1.384064000 |
| H | 1.893086000  | -2.361577000 | -2.110769000 |

|    |              |              |              |
|----|--------------|--------------|--------------|
| C  | 1.229803000  | -4.428186000 | -1.735599000 |
| H  | 2.229565000  | -4.908472000 | -1.784872000 |
| H  | 0.756169000  | -4.546272000 | -2.731667000 |
| H  | 0.609734000  | -5.002452000 | -1.017030000 |
| C  | 0.979752000  | -3.502415000 | 1.461596000  |
| H  | 1.238444000  | -4.569085000 | 1.280955000  |
| H  | 1.336463000  | -3.265130000 | 2.486273000  |
| C  | -0.533184000 | -3.276244000 | 1.334462000  |
| H  | -1.078929000 | -3.881217000 | 2.087150000  |
| H  | -0.918953000 | -3.570149000 | 0.338231000  |
| H  | -0.812545000 | -2.218213000 | 1.494904000  |
| C  | 4.836745000  | -0.116955000 | -2.055125000 |
| H  | 5.069351000  | 0.962705000  | -1.938839000 |
| H  | 5.774715000  | -0.609990000 | -2.389607000 |
| C  | 3.697468000  | -0.311285000 | -3.063127000 |
| H  | 3.565000000  | -1.379870000 | -3.333966000 |
| H  | 3.896338000  | 0.238868000  | -4.005341000 |
| H  | 2.737421000  | 0.045888000  | -2.640728000 |
| C  | 5.896259000  | -0.355333000 | 0.684718000  |
| H  | 5.713294000  | 0.635377000  | 1.149253000  |
| H  | 5.844499000  | -1.091181000 | 1.516719000  |
| C  | 7.268987000  | -0.395886000 | 0.003821000  |
| H  | 8.081188000  | -0.244902000 | 0.745930000  |
| H  | 7.371490000  | 0.398906000  | -0.762953000 |
| H  | 7.459179000  | -1.369098000 | -0.496158000 |
| C  | 0.531164000  | -0.061308000 | 0.044021000  |
| Al | -2.289750000 | 0.259847000  | -0.298524000 |
| C  | -3.693881000 | -0.396070000 | 0.961386000  |
| C  | -3.531712000 | -0.775023000 | 2.297828000  |
| C  | -4.590580000 | -1.231263000 | 3.104495000  |
| C  | -5.881408000 | -1.312176000 | 2.549539000  |
| C  | -6.095504000 | -0.940549000 | 1.207932000  |
| C  | -4.996819000 | -0.491898000 | 0.454655000  |
| C  | -2.032360000 | -0.887741000 | -1.928474000 |
| C  | -2.309518000 | -2.261427000 | -1.881169000 |
| C  | -1.841851000 | -3.181462000 | -2.837156000 |

|   |              |              |              |
|---|--------------|--------------|--------------|
| C | -1.046931000 | -2.708064000 | -3.895224000 |
| C | -0.748034000 | -1.337220000 | -3.993084000 |
| C | -1.256460000 | -0.461868000 | -3.017610000 |
| C | -2.317929000 | 2.252065000  | -0.534991000 |
| C | -2.653513000 | 2.903863000  | -1.729767000 |
| C | -2.391695000 | 4.268889000  | -1.956583000 |
| C | -1.792212000 | 5.027284000  | -0.932294000 |
| C | -1.474399000 | 4.421619000  | 0.296814000  |
| C | -1.772194000 | 3.060403000  | 0.471338000  |
| C | 2.666732000  | 1.638030000  | 3.073291000  |
| H | 2.309886000  | 1.827715000  | 4.105277000  |
| H | 3.769737000  | 1.785190000  | 3.080503000  |

**2-B:** E= -5819.114568

|    |              |              |              |
|----|--------------|--------------|--------------|
| Fe | 2.268390000  | -0.043942000 | 0.325638000  |
| P  | 2.457146000  | 0.827414000  | 2.302813000  |
| P  | 2.341709000  | 2.061777000  | -0.449957000 |
| P  | 4.286129000  | -0.658288000 | -0.430165000 |
| P  | 2.124994000  | -2.157004000 | 1.015533000  |
| O  | -0.729329000 | -0.006867000 | 0.558868000  |
| F  | -4.170229000 | 0.009720000  | 4.470291000  |
| F  | -4.802356000 | -0.591135000 | -0.925069000 |
| F  | -6.953881000 | -0.775500000 | 0.692353000  |
| F  | -6.668564000 | -0.473601000 | 3.416174000  |
| F  | -2.034178000 | 0.187520000  | 2.899824000  |
| F  | -2.766052000 | -2.837291000 | 0.469478000  |
| F  | -2.080450000 | -5.020388000 | -0.902303000 |
| F  | -0.800418000 | -4.809353000 | -3.323133000 |
| F  | -0.991589000 | -0.113151000 | -3.057894000 |
| F  | -0.272784000 | -2.313033000 | -4.367701000 |
| F  | -2.520807000 | 5.364094000  | -2.424467000 |
| F  | -1.432163000 | 4.922445000  | 0.074500000  |
| F  | -1.374875000 | 2.457618000  | 1.108675000  |
| F  | -3.513974000 | 3.245297000  | -3.862342000 |
| F  | -3.410959000 | 0.752806000  | -2.874649000 |
| O  | 0.785442000  | -0.413692000 | -1.132127000 |

|   |              |              |              |
|---|--------------|--------------|--------------|
| C | 0.921351000  | 0.622909000  | 3.361591000  |
| H | 0.149391000  | 0.270818000  | 2.656765000  |
| H | 1.129917000  | -0.220279000 | 4.054754000  |
| C | 0.370032000  | 1.830791000  | 4.125736000  |
| H | 1.082356000  | 2.245507000  | 4.868504000  |
| H | -0.551299000 | 1.529049000  | 4.665152000  |
| H | 0.072873000  | 2.643145000  | 3.432328000  |
| C | 3.836448000  | 0.350777000  | 3.473590000  |
| H | 3.774734000  | -0.756179000 | 3.565660000  |
| H | 4.780414000  | 0.559226000  | 2.925542000  |
| C | 3.847678000  | 1.012047000  | 4.857765000  |
| H | 4.722157000  | 0.670736000  | 5.451314000  |
| H | 2.937762000  | 0.763570000  | 5.441476000  |
| H | 3.908822000  | 2.117603000  | 4.786001000  |
| C | 1.889066000  | 3.188693000  | 0.965926000  |
| H | 2.093848000  | 4.253116000  | 0.726698000  |
| H | 0.795538000  | 3.084767000  | 1.120052000  |
| C | 1.159559000  | 2.513210000  | -1.809422000 |
| H | 0.168501000  | 2.133995000  | -1.494476000 |
| H | 1.087055000  | 3.622068000  | -1.828335000 |
| C | 1.514073000  | 1.934334000  | -3.183413000 |
| H | 2.536435000  | 2.212198000  | -3.517446000 |
| H | 0.801569000  | 2.306681000  | -3.947560000 |
| H | 1.431340000  | 0.831976000  | -3.171596000 |
| C | 3.940033000  | 2.860130000  | -1.023833000 |
| H | 4.608749000  | 2.836484000  | -0.137008000 |
| H | 4.399700000  | 2.172724000  | -1.762796000 |
| C | 3.849603000  | 4.280710000  | -1.594343000 |
| H | 4.863536000  | 4.681136000  | -1.805259000 |
| H | 3.359632000  | 4.984960000  | -0.890519000 |
| H | 3.280162000  | 4.309259000  | -2.545175000 |
| C | 4.642969000  | -2.474965000 | -0.041066000 |
| H | 4.327004000  | -3.074411000 | -0.920312000 |
| H | 5.733789000  | -2.638321000 | 0.084922000  |
| C | 3.839934000  | -2.883345000 | 1.195111000  |
| H | 4.276290000  | -2.448177000 | 2.120468000  |

|   |              |              |              |
|---|--------------|--------------|--------------|
| H | 3.793708000  | -3.984547000 | 1.334627000  |
| C | 1.334060000  | -3.195274000 | -0.310259000 |
| H | 0.309248000  | -2.784691000 | -0.394959000 |
| H | 1.817830000  | -2.895661000 | -1.260740000 |
| C | 1.306835000  | -4.714768000 | -0.137286000 |
| H | 2.324858000  | -5.158231000 | -0.130454000 |
| H | 0.745175000  | -5.175972000 | -0.976148000 |
| H | 0.794335000  | -5.021356000 | 0.797496000  |
| C | 1.283002000  | -2.763894000 | 2.562435000  |
| H | 1.624751000  | -3.810890000 | 2.719873000  |
| H | 1.700976000  | -2.172424000 | 3.404856000  |
| C | -0.248882000 | -2.685191000 | 2.535720000  |
| H | -0.669292000 | -3.052602000 | 3.494479000  |
| H | -0.687280000 | -3.304235000 | 1.728445000  |
| H | -0.614048000 | -1.652739000 | 2.385552000  |
| C | 4.505038000  | -0.645513000 | -2.292019000 |
| H | 4.545323000  | 0.422210000  | -2.595974000 |
| H | 5.491937000  | -1.087174000 | -2.549030000 |
| C | 3.366725000  | -1.361284000 | -3.032271000 |
| H | 3.414892000  | -2.461704000 | -2.892323000 |
| H | 3.426522000  | -1.173987000 | -4.123783000 |
| H | 2.375202000  | -1.020675000 | -2.675306000 |
| C | 5.862914000  | 0.131270000  | 0.217661000  |
| H | 5.664782000  | 1.216727000  | 0.320695000  |
| H | 5.938924000  | -0.260940000 | 1.255515000  |
| C | 7.164405000  | -0.107416000 | -0.556522000 |
| H | 8.032007000  | 0.312663000  | -0.005199000 |
| H | 7.142245000  | 0.377652000  | -1.553761000 |
| H | 7.368430000  | -1.187628000 | -0.714164000 |
| C | 0.451333000  | -0.088105000 | 0.046117000  |
| B | -2.090812000 | -0.044055000 | -0.214551000 |
| C | -3.303016000 | -0.199576000 | 0.886490000  |
| C | -3.215526000 | -0.048298000 | 2.279529000  |
| C | -4.325411000 | -0.139084000 | 3.142987000  |
| C | -5.600500000 | -0.384417000 | 2.610295000  |
| C | -5.742846000 | -0.537465000 | 1.219631000  |

|   |              |              |              |
|---|--------------|--------------|--------------|
| C | -4.604867000 | -0.435154000 | 0.401869000  |
| C | -1.964247000 | -1.334516000 | -1.229933000 |
| C | -2.219745000 | -2.635721000 | -0.753091000 |
| C | -1.871031000 | -3.808840000 | -1.448017000 |
| C | -1.211553000 | -3.703533000 | -2.681694000 |
| C | -0.945614000 | -2.429916000 | -3.210007000 |
| C | -1.335879000 | -1.286885000 | -2.490914000 |
| C | -2.287512000 | 1.451271000  | -0.876699000 |
| C | -2.887480000 | 1.732990000  | -2.119066000 |
| C | -2.964280000 | 3.033439000  | -2.656938000 |
| C | -2.468173000 | 4.123127000  | -1.919975000 |
| C | -1.921849000 | 3.896636000  | -0.646222000 |
| C | -1.881098000 | 2.585320000  | -0.145083000 |
| C | 2.676546000  | 2.693771000  | 2.183589000  |
| H | 2.367072000  | 3.199442000  | 3.119746000  |
| H | 3.766392000  | 2.879840000  | 2.058806000  |

**TS1:** E= -6036.7412422 (i = -272 cm-1)

|    |              |              |              |
|----|--------------|--------------|--------------|
| Fe | 2.475743000  | -0.067811000 | 0.114810000  |
| P  | 2.990845000  | 1.648362000  | 1.303684000  |
| P  | 2.258627000  | 1.334346000  | -1.647364000 |
| P  | 4.496049000  | -0.745080000 | -0.236216000 |
| P  | 2.370015000  | -1.603147000 | 1.719135000  |
| O  | -0.256275000 | -0.105586000 | 0.115646000  |
| F  | -2.768603000 | 1.549599000  | 4.901140000  |
| F  | -4.318942000 | -2.161718000 | 1.164298000  |
| F  | -5.347169000 | -2.259835000 | 3.673700000  |
| F  | -4.591945000 | -0.407864000 | 5.547026000  |
| F  | -1.721469000 | 1.647277000  | 2.392057000  |
| F  | -1.729968000 | -3.100949000 | 0.492557000  |
| F  | -1.598152000 | -5.306023000 | -1.097707000 |
| F  | -2.069217000 | -5.076841000 | -3.796974000 |
| F  | -2.810891000 | -0.428248000 | -3.310372000 |
| F  | -2.671161000 | -2.631404000 | -4.890036000 |
| F  | -4.004776000 | 5.332218000  | -2.375609000 |
| F  | -1.549094000 | 5.186403000  | -1.125619000 |

|   |              |              |              |
|---|--------------|--------------|--------------|
| F | -0.686205000 | 2.843621000  | -0.111054000 |
| F | -5.563590000 | 3.086852000  | -2.602511000 |
| F | -4.692362000 | 0.714999000  | -1.581761000 |
| O | 0.589795000  | -1.739878000 | -1.224554000 |
| C | 1.346922000  | 2.072621000  | 2.088520000  |
| H | 0.590127000  | 1.604635000  | 1.426634000  |
| H | 1.319720000  | 1.489985000  | 3.031431000  |
| C | 0.980894000  | 3.540257000  | 2.343349000  |
| H | 1.686728000  | 4.055038000  | 3.025726000  |
| H | -0.027632000 | 3.570580000  | 2.803410000  |
| H | 0.915755000  | 4.122860000  | 1.403532000  |
| C | 4.215141000  | 1.737391000  | 2.710771000  |
| H | 3.833831000  | 1.007728000  | 3.457646000  |
| H | 5.163101000  | 1.305379000  | 2.327553000  |
| C | 4.468408000  | 3.101455000  | 3.366212000  |
| H | 5.214117000  | 3.007057000  | 4.183379000  |
| H | 3.545121000  | 3.524626000  | 3.808637000  |
| H | 4.866374000  | 3.840706000  | 2.641431000  |
| C | 2.420324000  | 3.085703000  | -0.976148000 |
| H | 2.732205000  | 3.778307000  | -1.784494000 |
| H | 1.393674000  | 3.379306000  | -0.677575000 |
| C | 0.674344000  | 1.446057000  | -2.623736000 |
| H | -0.118062000 | 1.409833000  | -1.856528000 |
| H | 0.625886000  | 2.458728000  | -3.080683000 |
| C | 0.454110000  | 0.342009000  | -3.667212000 |
| H | 1.150191000  | 0.426196000  | -4.527740000 |
| H | -0.581166000 | 0.401571000  | -4.059038000 |
| H | 0.565258000  | -0.663193000 | -3.215551000 |
| C | 3.529353000  | 1.293348000  | -3.024702000 |
| H | 4.528290000  | 1.318401000  | -2.542205000 |
| H | 3.422659000  | 0.285800000  | -3.478261000 |
| C | 3.426879000  | 2.379573000  | -4.102418000 |
| H | 4.224159000  | 2.242990000  | -4.863062000 |
| H | 3.548373000  | 3.399848000  | -3.683593000 |
| H | 2.455433000  | 2.349097000  | -4.635055000 |
| C | 5.011083000  | -2.055204000 | 1.033626000  |



|    |              |              |              |
|----|--------------|--------------|--------------|
| H  | 4.872396000  | -3.042670000 | 0.543873000  |
| H  | 6.092469000  | -1.957129000 | 1.265993000  |
| C  | 4.125135000  | -1.955803000 | 2.275993000  |
| H  | 4.422363000  | -1.098406000 | 2.914783000  |
| H  | 4.173080000  | -2.868991000 | 2.905164000  |
| C  | 1.712144000  | -3.264939000 | 1.194936000  |
| H  | 0.638654000  | -3.097839000 | 0.968053000  |
| H  | 2.165453000  | -3.454418000 | 0.200966000  |
| C  | 1.905557000  | -4.442410000 | 2.153095000  |
| H  | 2.976588000  | -4.668623000 | 2.341365000  |
| H  | 1.447540000  | -5.358055000 | 1.724475000  |
| H  | 1.418287000  | -4.267307000 | 3.135004000  |
| C  | 1.520724000  | -1.317488000 | 3.351072000  |
| H  | 1.800011000  | -2.164343000 | 4.015754000  |
| H  | 1.990341000  | -0.411104000 | 3.790674000  |
| C  | 0.003619000  | -1.155782000 | 3.240662000  |
| H  | -0.450859000 | -0.973034000 | 4.235977000  |
| H  | -0.484681000 | -2.051593000 | 2.807097000  |
| H  | -0.252524000 | -0.306428000 | 2.584360000  |
| C  | 4.723460000  | -1.714003000 | -1.824647000 |
| H  | 4.834133000  | -0.973751000 | -2.640745000 |
| H  | 5.704724000  | -2.229276000 | -1.734712000 |
| C  | 3.599707000  | -2.707840000 | -2.130167000 |
| H  | 3.596609000  | -3.547585000 | -1.403303000 |
| H  | 3.737505000  | -3.153990000 | -3.136538000 |
| H  | 2.594140000  | -2.239309000 | -2.080624000 |
| C  | 5.988229000  | 0.395328000  | -0.273619000 |
| H  | 5.657538000  | 1.297859000  | -0.829696000 |
| H  | 6.119947000  | 0.722612000  | 0.778772000  |
| C  | 7.306736000  | -0.146766000 | -0.838581000 |
| H  | 8.123375000  | 0.593539000  | -0.704298000 |
| H  | 7.233899000  | -0.363840000 | -1.923275000 |
| H  | 7.623114000  | -1.081190000 | -0.329128000 |
| C  | 0.739960000  | -0.792263000 | -0.445888000 |
| Al | -2.087304000 | -0.136561000 | -0.124890000 |
| C  | -2.958100000 | -0.266916000 | 1.684106000  |

|   |              |              |              |
|---|--------------|--------------|--------------|
| C | -2.631343000 | 0.668375000  | 2.671964000  |
| C | -3.145872000 | 0.646802000  | 3.977820000  |
| C | -4.074419000 | -0.357326000 | 4.311181000  |
| C | -4.455247000 | -1.310797000 | 3.348047000  |
| C | -3.898905000 | -1.238300000 | 2.055191000  |
| C | -2.368199000 | -1.700214000 | -1.332533000 |
| C | -2.049557000 | -2.965872000 | -0.828308000 |
| C | -1.941317000 | -4.115445000 | -1.621484000 |
| C | -2.167362000 | -3.996536000 | -3.006718000 |
| C | -2.482033000 | -2.743498000 | -3.563588000 |
| C | -2.575181000 | -1.626284000 | -2.712605000 |
| C | -2.632050000 | 1.663001000  | -0.858435000 |
| C | -3.883250000 | 1.793669000  | -1.478857000 |
| C | -4.364289000 | 3.006415000  | -2.006662000 |
| C | -3.569767000 | 4.163463000  | -1.884703000 |
| C | -2.317560000 | 4.087358000  | -1.247739000 |
| C | -1.901145000 | 2.847444000  | -0.736824000 |
| C | 3.375640000  | 3.129097000  | 0.223835000  |
| H | 3.273813000  | 4.073761000  | 0.797189000  |
| H | 4.437658000  | 3.043637000  | -0.092614000 |

**TS1-B:** E= -5819.0823944 (i = -228 cm-1)

|    |              |              |              |
|----|--------------|--------------|--------------|
| Fe | -2.328990000 | -0.028563000 | 0.212009000  |
| P  | -3.028425000 | -2.043246000 | 0.533401000  |
| P  | -2.222184000 | -0.534007000 | -1.997081000 |
| P  | -4.270725000 | 0.940795000  | 0.192325000  |
| P  | -2.180079000 | 0.692058000  | 2.317712000  |
| O  | 0.453414000  | 0.044699000  | 0.235069000  |
| F  | 2.865626000  | -3.209144000 | 3.517271000  |
| F  | 4.385529000  | 1.560095000  | 1.300614000  |
| F  | 5.679188000  | 0.627064000  | 3.436551000  |
| F  | 4.957967000  | -1.760824000 | 4.592037000  |
| F  | 1.588664000  | -2.323796000 | 1.340992000  |
| F  | 1.858256000  | 2.475406000  | 1.708672000  |
| F  | 1.847137000  | 5.081522000  | 1.025969000  |
| F  | 2.085757000  | 5.822711000  | -1.616913000 |

|   |              |              |              |
|---|--------------|--------------|--------------|
| F | 2.394298000  | 1.291658000  | -2.894730000 |
| F | 2.351964000  | 3.879323000  | -3.554805000 |
| F | 3.928499000  | -3.863978000 | -3.840862000 |
| F | 1.351722000  | -4.057357000 | -2.834001000 |
| F | 0.425371000  | -2.237576000 | -1.142582000 |
| F | 5.515642000  | -1.749440000 | -3.081073000 |
| F | 4.573585000  | 0.114377000  | -1.362384000 |
| O | -0.480150000 | 2.016864000  | -0.466563000 |
| C | -1.430115000 | -2.781063000 | 1.162997000  |
| H | -0.643513000 | -2.044847000 | 0.893391000  |
| H | -1.508475000 | -2.745041000 | 2.269488000  |
| C | -1.002989000 | -4.176466000 | 0.689965000  |
| H | -1.744512000 | -4.963776000 | 0.931507000  |
| H | -0.045993000 | -4.436384000 | 1.186887000  |
| H | -0.805246000 | -4.199770000 | -0.398748000 |
| C | -4.343122000 | -2.721026000 | 1.673854000  |
| H | -4.261289000 | -2.121525000 | 2.606296000  |
| H | -5.314069000 | -2.440475000 | 1.213853000  |
| C | -4.307001000 | -4.222527000 | 1.988848000  |
| H | -5.165654000 | -4.505325000 | 2.633530000  |
| H | -3.381692000 | -4.506947000 | 2.529128000  |
| H | -4.365707000 | -4.840272000 | 1.069145000  |
| C | -2.394104000 | -2.401884000 | -2.147166000 |
| H | -2.711456000 | -2.673806000 | -3.174113000 |
| H | -1.382234000 | -2.821551000 | -2.000151000 |
| C | -0.727757000 | -0.109926000 | -3.033209000 |
| H | 0.147207000  | -0.267487000 | -2.378130000 |
| H | -0.647472000 | -0.856279000 | -3.853364000 |
| C | -0.707984000 | 1.328772000  | -3.568826000 |
| H | -1.477100000 | 1.511526000  | -4.347639000 |
| H | 0.283587000  | 1.542283000  | -4.014079000 |
| H | -0.848048000 | 2.053227000  | -2.742741000 |
| C | -3.602879000 | 0.048018000  | -3.127787000 |
| H | -4.558197000 | -0.151592000 | -2.601719000 |
| H | -3.490308000 | 1.150352000  | -3.167329000 |
| C | -3.641061000 | -0.531110000 | -4.546948000 |

|   |              |              |              |
|---|--------------|--------------|--------------|
| H | -4.441773000 | -0.040662000 | -5.139581000 |
| H | -3.855191000 | -1.619452000 | -4.551501000 |
| H | -2.687086000 | -0.374521000 | -5.089861000 |
| C | -4.708074000 | 1.664269000  | 1.884547000  |
| H | -4.423884000 | 2.737650000  | 1.863228000  |
| H | -5.806991000 | 1.618886000  | 2.037789000  |
| C | -3.919031000 | 0.929291000  | 2.963059000  |
| H | -4.328217000 | -0.088106000 | 3.139874000  |
| H | -3.917535000 | 1.463254000  | 3.935979000  |
| C | -1.398203000 | 2.368727000  | 2.520618000  |
| H | -0.331733000 | 2.224913000  | 2.251329000  |
| H | -1.802723000 | 2.981845000  | 1.689610000  |
| C | -1.540094000 | 3.064930000  | 3.876530000  |
| H | -2.597541000 | 3.285702000  | 4.135393000  |
| H | -0.996935000 | 4.032760000  | 3.863580000  |
| H | -1.108171000 | 2.462360000  | 4.702988000  |
| C | -1.431271000 | -0.299987000 | 3.702112000  |
| H | -1.714480000 | 0.199566000  | 4.654556000  |
| H | -1.958832000 | -1.278437000 | 3.694173000  |
| C | 0.080640000  | -0.478596000 | 3.571001000  |
| H | 0.474419000  | -1.181368000 | 4.333553000  |
| H | 0.623954000  | 0.481425000  | 3.678851000  |
| H | 0.331794000  | -0.877631000 | 2.574150000  |
| C | -4.463253000 | 2.478288000  | -0.859531000 |
| H | -4.582901000 | 2.145730000  | -1.908365000 |
| H | -5.433346000 | 2.932054000  | -0.560842000 |
| C | -3.317058000 | 3.485729000  | -0.732110000 |
| H | -3.294190000 | 3.951239000  | 0.276111000  |
| H | -3.444831000 | 4.310333000  | -1.463215000 |
| H | -2.326723000 | 3.010469000  | -0.890384000 |
| C | -5.848057000 | -0.017898000 | -0.184719000 |
| H | -5.591400000 | -0.758693000 | -0.970553000 |
| H | -6.027344000 | -0.607402000 | 0.739234000  |
| C | -7.105099000 | 0.771343000  | -0.569301000 |
| H | -7.978778000 | 0.091758000  | -0.657698000 |
| H | -6.987461000 | 1.286902000  | -1.543753000 |

|   |              |              |              |
|---|--------------|--------------|--------------|
| H | -7.363251000 | 1.539663000  | 0.189606000  |
| C | -0.575386000 | 0.856966000  | -0.057585000 |
| B | 1.974027000  | 0.200932000  | -0.080910000 |
| C | 2.832638000  | -0.275697000 | 1.256564000  |
| C | 2.565385000  | -1.524369000 | 1.846634000  |
| C | 3.230059000  | -2.033160000 | 2.973469000  |
| C | 4.294155000  | -1.299401000 | 3.522078000  |
| C | 4.649418000  | -0.073556000 | 2.935573000  |
| C | 3.936099000  | 0.399888000  | 1.815106000  |
| C | 2.216239000  | 1.752902000  | -0.541563000 |
| C | 2.072123000  | 2.784883000  | 0.401380000  |
| C | 2.027674000  | 4.145086000  | 0.076967000  |
| C | 2.133671000  | 4.525792000  | -1.273460000 |
| C | 2.280089000  | 3.534824000  | -2.256057000 |
| C | 2.323512000  | 2.182354000  | -1.871237000 |
| C | 2.435991000  | -0.924454000 | -1.203736000 |
| C | 3.746837000  | -0.889521000 | -1.719739000 |
| C | 4.263633000  | -1.847867000 | -2.608254000 |
| C | 3.456921000  | -2.935849000 | -2.995485000 |
| C | 2.153569000  | -3.030035000 | -2.485636000 |
| C | 1.693215000  | -2.043591000 | -1.596226000 |
| C | -3.371370000 | -2.925717000 | -1.086860000 |
| H | -3.294277000 | -4.026159000 | -0.962373000 |
| H | -4.426371000 | -2.695479000 | -1.356181000 |

**INT1:** E= -6036.7603105

|    |              |              |              |
|----|--------------|--------------|--------------|
| Fe | 2.150015000  | 0.046478000  | -0.157078000 |
| P  | 3.251331000  | -1.476648000 | 1.097854000  |
| P  | 2.129886000  | 1.290162000  | 1.737816000  |
| P  | 3.530955000  | 1.273403000  | -1.266539000 |
| P  | 2.016883000  | -1.278948000 | -2.015682000 |
| O  | -0.207519000 | 0.153080000  | -0.213167000 |
| F  | -1.733014000 | -5.126355000 | -1.199924000 |
| F  | -4.300390000 | -0.404232000 | -2.308319000 |
| F  | -4.850337000 | -2.619939000 | -3.778322000 |
| F  | -3.575411000 | -4.984248000 | -3.233992000 |

|   |              |              |              |
|---|--------------|--------------|--------------|
| F | -1.150183000 | -2.899657000 | 0.258214000  |
| F | -2.160340000 | 1.206116000  | -2.830768000 |
| F | -2.548504000 | 3.737998000  | -3.752425000 |
| F | -3.104278000 | 5.765105000  | -1.988949000 |
| F | -2.934567000 | 2.722522000  | 1.626289000  |
| F | -3.280374000 | 5.243933000  | 0.705696000  |
| F | -2.947274000 | -1.069037000 | 6.074044000  |
| F | -0.490351000 | -1.627835000 | 4.936794000  |
| F | -0.102667000 | -1.208055000 | 2.302035000  |
| F | -4.974249000 | -0.057097000 | 4.528887000  |
| F | -4.568242000 | 0.389498000  | 1.867496000  |
| O | 0.362359000  | 1.965757000  | -1.520092000 |
| C | 2.171801000  | -2.984377000 | 1.435921000  |
| H | 1.170720000  | -2.701448000 | 1.058526000  |
| H | 2.548711000  | -3.778900000 | 0.757604000  |
| C | 2.053433000  | -3.507542000 | 2.871035000  |
| H | 3.034478000  | -3.776396000 | 3.313428000  |
| H | 1.422181000  | -4.420929000 | 2.884725000  |
| H | 1.555769000  | -2.771097000 | 3.532468000  |
| C | 4.905525000  | -2.222557000 | 0.637605000  |
| H | 4.810018000  | -2.568422000 | -0.414232000 |
| H | 5.606776000  | -1.361629000 | 0.605869000  |
| C | 5.449795000  | -3.340711000 | 1.535016000  |
| H | 6.438325000  | -3.692772000 | 1.171256000  |
| H | 4.774502000  | -4.220615000 | 1.553269000  |
| H | 5.586107000  | -3.000052000 | 2.582125000  |
| C | 2.497201000  | 0.163432000  | 3.193988000  |
| H | 2.731509000  | 0.761296000  | 4.098234000  |
| H | 1.567445000  | -0.399374000 | 3.403589000  |
| C | 0.545522000  | 2.110891000  | 2.273660000  |
| H | -0.244779000 | 1.357607000  | 2.090930000  |
| H | 0.604047000  | 2.247239000  | 3.375551000  |
| C | 0.200782000  | 3.426969000  | 1.564419000  |
| H | 0.963708000  | 4.213870000  | 1.741458000  |
| H | -0.768270000 | 3.810002000  | 1.941139000  |
| H | 0.090380000  | 3.282780000  | 0.471297000  |

|   |              |              |              |
|---|--------------|--------------|--------------|
| C | 3.394927000  | 2.649690000  | 1.997464000  |
| H | 4.369632000  | 2.242860000  | 1.652550000  |
| H | 3.121317000  | 3.441204000  | 1.273973000  |
| C | 3.510487000  | 3.244300000  | 3.405503000  |
| H | 4.216129000  | 4.101518000  | 3.404958000  |
| H | 3.890820000  | 2.510530000  | 4.145239000  |
| H | 2.535202000  | 3.622723000  | 3.775303000  |
| C | 3.418734000  | 0.821532000  | -3.083044000 |
| H | 2.471857000  | 1.278288000  | -3.439195000 |
| H | 4.249731000  | 1.262963000  | -3.669779000 |
| C | 3.347373000  | -0.698663000 | -3.191169000 |
| H | 4.296737000  | -1.181006000 | -2.869064000 |
| H | 3.135961000  | -1.047696000 | -4.223647000 |
| C | 0.439256000  | -1.088689000 | -2.996302000 |
| H | -0.353242000 | -1.505049000 | -2.341300000 |
| H | 0.227521000  | -0.001448000 | -3.035161000 |
| C | 0.387888000  | -1.705105000 | -4.396823000 |
| H | 1.117842000  | -1.236010000 | -5.089300000 |
| H | -0.619687000 | -1.548515000 | -4.835213000 |
| H | 0.578164000  | -2.797947000 | -4.394853000 |
| C | 2.306774000  | -3.130950000 | -2.097255000 |
| H | 2.665464000  | -3.341441000 | -3.128879000 |
| H | 3.166277000  | -3.344975000 | -1.428091000 |
| C | 1.109464000  | -4.025067000 | -1.762024000 |
| H | 1.406926000  | -5.093818000 | -1.765865000 |
| H | 0.293682000  | -3.914010000 | -2.503346000 |
| H | 0.674702000  | -3.804260000 | -0.771470000 |
| C | 3.265526000  | 3.134545000  | -1.289071000 |
| H | 2.260261000  | 3.271483000  | -0.845040000 |
| H | 4.014046000  | 3.565570000  | -0.592758000 |
| C | 3.320086000  | 3.848042000  | -2.644769000 |
| H | 4.278841000  | 3.688423000  | -3.179042000 |
| H | 3.200180000  | 4.942082000  | -2.497781000 |
| H | 2.492097000  | 3.518063000  | -3.302216000 |
| C | 5.365724000  | 1.088930000  | -0.934434000 |
| H | 5.483019000  | 1.203944000  | 0.165469000  |

|    |              |              |              |
|----|--------------|--------------|--------------|
| H  | 5.579426000  | 0.019393000  | -1.145560000 |
| C  | 6.334767000  | 2.005763000  | -1.690118000 |
| H  | 7.386621000  | 1.778365000  | -1.416043000 |
| H  | 6.158511000  | 3.076084000  | -1.457826000 |
| H  | 6.249610000  | 1.883547000  | -2.789697000 |
| C  | 0.662825000  | 1.004008000  | -0.817528000 |
| Al | -2.025243000 | 0.047366000  | 0.034171000  |
| C  | -2.660713000 | -1.550276000 | -1.005216000 |
| C  | -2.070287000 | -2.792181000 | -0.743180000 |
| C  | -2.348386000 | -3.960344000 | -1.471334000 |
| C  | -3.289890000 | -3.890055000 | -2.515317000 |
| C  | -3.937379000 | -2.671630000 | -2.796490000 |
| C  | -3.622624000 | -1.534575000 | -2.025537000 |
| C  | -2.618170000 | 1.848290000  | -0.578867000 |
| C  | -2.501965000 | 2.169051000  | -1.938687000 |
| C  | -2.676655000 | 3.467090000  | -2.442796000 |
| C  | -2.951435000 | 4.511071000  | -1.538352000 |
| C  | -3.059156000 | 4.240350000  | -0.162181000 |
| C  | -2.889695000 | 2.916773000  | 0.281092000  |
| C  | -2.309785000 | -0.347554000 | 1.986902000  |
| C  | -3.543255000 | -0.095913000 | 2.602744000  |
| C  | -3.783037000 | -0.320806000 | 3.971785000  |
| C  | -2.745823000 | -0.846985000 | 4.768424000  |
| C  | -1.498461000 | -1.135737000 | 4.185627000  |
| C  | -1.328767000 | -0.899069000 | 2.812987000  |
| C  | 3.632936000  | -0.780847000 | 2.800657000  |
| H  | 3.789072000  | -1.582043000 | 3.550697000  |
| H  | 4.594428000  | -0.229423000 | 2.703067000  |

**INT1-B:** E= -5819.1016235

|    |             |              |              |
|----|-------------|--------------|--------------|
| Fe | 2.062091000 | 0.003853000  | -0.170607000 |
| P  | 3.198804000 | -1.733093000 | 0.745852000  |
| P  | 2.181154000 | 0.892326000  | 1.907416000  |
| P  | 3.405753000 | 1.440217000  | -1.073541000 |
| P  | 1.910214000 | -0.954437000 | -2.237080000 |



|   |              |              |              |
|---|--------------|--------------|--------------|
| O | -0.305179000 | 0.141098000  | -0.208486000 |
| F | -1.961261000 | -4.430490000 | -2.041261000 |
| F | -4.446708000 | 0.429032000  | -1.584416000 |
| F | -5.482353000 | -1.444804000 | -3.182849000 |
| F | -4.268197000 | -3.895262000 | -3.449068000 |
| F | -0.895112000 | -2.550133000 | -0.425808000 |
| F | -2.138072000 | 1.574438000  | -2.466897000 |
| F | -2.697560000 | 4.189504000  | -2.791629000 |
| F | -3.106376000 | 5.800588000  | -0.600598000 |
| F | -2.440982000 | 2.124769000  | 2.276253000  |
| F | -2.948266000 | 4.720832000  | 1.933023000  |
| F | -3.101249000 | -2.380244000 | 5.197734000  |
| F | -0.524435000 | -2.539939000 | 4.196364000  |
| F | 0.085981000  | -1.450211000 | 1.855792000  |
| F | -5.025041000 | -1.033272000 | 3.763256000  |
| F | -4.400950000 | 0.123293000  | 1.399473000  |
| O | 0.321105000  | 2.172613000  | -1.126048000 |
| C | 2.162606000  | -3.306312000 | 0.793525000  |
| H | 1.163428000  | -2.982318000 | 0.451189000  |
| H | 2.571869000  | -3.964248000 | -0.001853000 |
| C | 2.034772000  | -4.065191000 | 2.117075000  |
| H | 3.014450000  | -4.397628000 | 2.518574000  |
| H | 1.412908000  | -4.973194000 | 1.969721000  |
| H | 1.523619000  | -3.451780000 | 2.885441000  |
| C | 4.852174000  | -2.326744000 | 0.104725000  |
| H | 4.726659000  | -2.465363000 | -0.991223000 |
| H | 5.530002000  | -1.454822000 | 0.221171000  |
| C | 5.451039000  | -3.578365000 | 0.757882000  |
| H | 6.437767000  | -3.824322000 | 0.311730000  |
| H | 4.799102000  | -4.466061000 | 0.624290000  |
| H | 5.605829000  | -3.437534000 | 1.847537000  |
| C | 2.533649000  | -0.480040000 | 3.143318000  |
| H | 2.839441000  | -0.047286000 | 4.117767000  |
| H | 1.594180000  | -1.037831000 | 3.312789000  |
| C | 0.683188000  | 1.740881000  | 2.613184000  |
| H | -0.182450000 | 1.111866000  | 2.327396000  |

|   |              |              |              |
|---|--------------|--------------|--------------|
| H | 0.760726000  | 1.693356000  | 3.721303000  |
| C | 0.465142000  | 3.180361000  | 2.127601000  |
| H | 1.319255000  | 3.846539000  | 2.371219000  |
| H | -0.438479000 | 3.605113000  | 2.607933000  |
| H | 0.296193000  | 3.210911000  | 1.033295000  |
| C | 3.576575000  | 2.060943000  | 2.368456000  |
| H | 4.510945000  | 1.529377000  | 2.088202000  |
| H | 3.503104000  | 2.928640000  | 1.688099000  |
| C | 3.642338000  | 2.545734000  | 3.822170000  |
| H | 4.495123000  | 3.244449000  | 3.954110000  |
| H | 3.789371000  | 1.715596000  | 4.542702000  |
| H | 2.723207000  | 3.090210000  | 4.119822000  |
| C | 3.284398000  | 1.307702000  | -2.938219000 |
| H | 2.332218000  | 1.798745000  | -3.224846000 |
| H | 4.109512000  | 1.854394000  | -3.438335000 |
| C | 3.244085000  | -0.175802000 | -3.288949000 |
| H | 4.199800000  | -0.684588000 | -3.034319000 |
| H | 3.049391000  | -0.359286000 | -4.366261000 |
| C | 0.347147000  | -0.551824000 | -3.171845000 |
| H | -0.463599000 | -1.042051000 | -2.597979000 |
| H | 0.167359000  | 0.531905000  | -3.020709000 |
| C | 0.283249000  | -0.921680000 | -4.656871000 |
| H | 1.029891000  | -0.366256000 | -5.262222000 |
| H | -0.717327000 | -0.663166000 | -5.061738000 |
| H | 0.440654000  | -2.004950000 | -4.838423000 |
| C | 2.202306000  | -2.752027000 | -2.694113000 |
| H | 2.529592000  | -2.729815000 | -3.756909000 |
| H | 3.088599000  | -3.083325000 | -2.112320000 |
| C | 1.038905000  | -3.733121000 | -2.531532000 |
| H | 1.347808000  | -4.749720000 | -2.852437000 |
| H | 0.166542000  | -3.448735000 | -3.151522000 |
| H | 0.677469000  | -3.802325000 | -1.492106000 |
| C | 3.118038000  | 3.275143000  | -0.752822000 |
| H | 2.255679000  | 3.309646000  | -0.061902000 |
| H | 4.008826000  | 3.650137000  | -0.205653000 |
| C | 2.812595000  | 4.162330000  | -1.963839000 |

|   |              |              |              |
|---|--------------|--------------|--------------|
| H | 3.618554000  | 4.145027000  | -2.725698000 |
| H | 2.688338000  | 5.215503000  | -1.634855000 |
| H | 1.859503000  | 3.849264000  | -2.432762000 |
| C | 5.255549000  | 1.241417000  | -0.830031000 |
| H | 5.414100000  | 1.206826000  | 0.268319000  |
| H | 5.483920000  | 0.219471000  | -1.201700000 |
| C | 6.179828000  | 2.275561000  | -1.484902000 |
| H | 7.243810000  | 2.044834000  | -1.266232000 |
| H | 5.984628000  | 3.303494000  | -1.115842000 |
| H | 6.069545000  | 2.291690000  | -2.588941000 |
| C | 0.579274000  | 1.081170000  | -0.624054000 |
| B | -1.833446000 | 0.142207000  | 0.051166000  |
| C | -2.554312000 | -0.925505000 | -0.991519000 |
| C | -2.010446000 | -2.215393000 | -1.126375000 |
| C | -2.548389000 | -3.221902000 | -1.944465000 |
| C | -3.728909000 | -2.956335000 | -2.659161000 |
| C | -4.342122000 | -1.699627000 | -2.523561000 |
| C | -3.762372000 | -0.724378000 | -1.686086000 |
| C | -2.329961000 | 1.693833000  | -0.088059000 |
| C | -2.391795000 | 2.302432000  | -1.356018000 |
| C | -2.666688000 | 3.661606000  | -1.556330000 |
| C | -2.864335000 | 4.491337000  | -0.437446000 |
| C | -2.801577000 | 3.936031000  | 0.849251000  |
| C | -2.537345000 | 2.561388000  | 0.993405000  |
| C | -2.119185000 | -0.543546000 | 1.527033000  |
| C | -3.420126000 | -0.517424000 | 2.066852000  |
| C | -3.772347000 | -1.112435000 | 3.290508000  |
| C | -2.792791000 | -1.807715000 | 4.025876000  |
| C | -1.490035000 | -1.887619000 | 3.512077000  |
| C | -1.196679000 | -1.283840000 | 2.276481000  |
| C | 3.617490000  | -1.383414000 | 2.548077000  |
| H | 3.747386000  | -2.317412000 | 3.130260000  |
| H | 4.603730000  | -0.867770000 | 2.538300000  |

**TS2:** E= -6036.7445342 (i = -162 cm-1)

|    |              |              |             |
|----|--------------|--------------|-------------|
| Fe | -2.273377000 | -0.030567000 | 0.253906000 |
|----|--------------|--------------|-------------|

|   |              |              |              |
|---|--------------|--------------|--------------|
| P | -2.600212000 | -1.871751000 | 1.587599000  |
| P | -2.296841000 | -1.546445000 | -1.457440000 |
| P | -4.246297000 | 0.823372000  | -0.059671000 |
| P | -2.090689000 | 1.419845000  | 1.989663000  |
| O | 0.081830000  | 0.033827000  | 0.257967000  |
| F | 3.480639000  | -1.673474000 | 4.624507000  |
| F | 4.304802000  | 2.100157000  | 0.727414000  |
| F | 5.806952000  | 2.140223000  | 2.975617000  |
| F | 5.417307000  | 0.260431000  | 4.934952000  |
| F | 1.978095000  | -1.731987000 | 2.367938000  |
| F | 1.795358000  | 3.180355000  | 0.707142000  |
| F | 1.355939000  | 5.443383000  | -0.715471000 |
| F | 1.229855000  | 5.343976000  | -3.462804000 |
| F | 1.928759000  | 0.666030000  | -3.355588000 |
| F | 1.528033000  | 2.943206000  | -4.767793000 |
| F | 3.863413000  | -4.831195000 | -3.291062000 |
| F | 1.677600000  | -5.064487000 | -1.619528000 |
| F | 0.827069000  | -2.927533000 | -0.205162000 |
| F | 5.148495000  | -2.420654000 | -3.538741000 |
| F | 4.277597000  | -0.259053000 | -2.134210000 |
| O | -0.995929000 | 1.928124000  | -1.528201000 |
| C | -0.932222000 | -2.308884000 | 2.278853000  |
| H | -0.238325000 | -1.765152000 | 1.601360000  |
| H | -0.866448000 | -1.787348000 | 3.255298000  |
| C | -0.526296000 | -3.778853000 | 2.417211000  |
| H | -1.200567000 | -4.362416000 | 3.076269000  |
| H | 0.495348000  | -3.818360000 | 2.846437000  |
| H | -0.470464000 | -4.287459000 | 1.434950000  |
| C | -3.805231000 | -1.961056000 | 3.008104000  |
| H | -3.673609000 | -1.018421000 | 3.581418000  |
| H | -4.814945000 | -1.897549000 | 2.548375000  |
| C | -3.702054000 | -3.174758000 | 3.940381000  |
| H | -4.492594000 | -3.137428000 | 4.719022000  |
| H | -2.724012000 | -3.204505000 | 4.461583000  |
| H | -3.821804000 | -4.131396000 | 3.391691000  |
| C | -2.235981000 | -3.277504000 | -0.750281000 |

|   |              |              |              |
|---|--------------|--------------|--------------|
| H | -2.566126000 | -4.014280000 | -1.510392000 |
| H | -1.165194000 | -3.475076000 | -0.548348000 |
| C | -0.826461000 | -1.473288000 | -2.586861000 |
| H | -0.019397000 | -1.137740000 | -1.905144000 |
| H | -0.574004000 | -2.507273000 | -2.904944000 |
| C | -0.961636000 | -0.525304000 | -3.784321000 |
| H | -1.659703000 | -0.911638000 | -4.555414000 |
| H | 0.029695000  | -0.380805000 | -4.255124000 |
| H | -1.305820000 | 0.481398000  | -3.475777000 |
| C | -3.746237000 | -1.625594000 | -2.637229000 |
| H | -4.673610000 | -1.606142000 | -2.027407000 |
| H | -3.714725000 | -0.662923000 | -3.187496000 |
| C | -3.765395000 | -2.805941000 | -3.617225000 |
| H | -4.566082000 | -2.668611000 | -4.373742000 |
| H | -3.963162000 | -3.769624000 | -3.105209000 |
| H | -2.806307000 | -2.907797000 | -4.164791000 |
| C | -4.553993000 | 2.248459000  | 1.138770000  |
| H | -4.142413000 | 3.163717000  | 0.665384000  |
| H | -5.642854000 | 2.415105000  | 1.274405000  |
| C | -3.817112000 | 1.964490000  | 2.451053000  |
| H | -4.292624000 | 1.131540000  | 3.012837000  |
| H | -3.791975000 | 2.849005000  | 3.122010000  |
| C | -1.227878000 | 2.988998000  | 1.515305000  |
| H | -0.239332000 | 2.639764000  | 1.158399000  |
| H | -1.747770000 | 3.362353000  | 0.608893000  |
| C | -1.078376000 | 4.091539000  | 2.564844000  |
| H | -2.055464000 | 4.486681000  | 2.915452000  |
| H | -0.511216000 | 4.936519000  | 2.122830000  |
| H | -0.508204000 | 3.750647000  | 3.452727000  |
| C | -1.311611000 | 0.985371000  | 3.616990000  |
| H | -1.579607000 | 1.792827000  | 4.333840000  |
| H | -1.816814000 | 0.065755000  | 3.980989000  |
| C | 0.203790000  | 0.785684000  | 3.504175000  |
| H | 0.621014000  | 0.336542000  | 4.428258000  |
| H | 0.735218000  | 1.740459000  | 3.319859000  |
| H | 0.437650000  | 0.126988000  | 2.649353000  |

|    |              |              |              |
|----|--------------|--------------|--------------|
| C  | -4.582548000 | 1.597811000  | -1.735749000 |
| H  | -3.575466000 | 1.797932000  | -2.156807000 |
| H  | -5.028655000 | 0.795422000  | -2.357726000 |
| C  | -5.446677000 | 2.865401000  | -1.795162000 |
| H  | -6.439656000 | 2.729152000  | -1.323228000 |
| H  | -5.617871000 | 3.155214000  | -2.852893000 |
| H  | -4.953078000 | 3.726740000  | -1.302494000 |
| C  | -5.732477000 | -0.266102000 | 0.281591000  |
| H  | -5.485944000 | -1.257419000 | -0.154343000 |
| H  | -5.708803000 | -0.411082000 | 1.383049000  |
| C  | -7.114774000 | 0.207885000  | -0.179325000 |
| H  | -7.895032000 | -0.526371000 | 0.111668000  |
| H  | -7.165692000 | 0.322462000  | -1.281358000 |
| H  | -7.395389000 | 1.180533000  | 0.275175000  |
| C  | -1.348728000 | 1.098179000  | -0.773752000 |
| Al | 1.802070000  | 0.155319000  | -0.152129000 |
| C  | 3.022243000  | 0.223423000  | 1.477874000  |
| C  | 2.906030000  | -0.737469000 | 2.487777000  |
| C  | 3.669873000  | -0.745736000 | 3.666202000  |
| C  | 4.659461000  | 0.241348000  | 3.827377000  |
| C  | 4.849159000  | 1.209491000  | 2.824171000  |
| C  | 4.041324000  | 1.168363000  | 1.669788000  |
| C  | 1.940657000  | 1.833592000  | -1.267288000 |
| C  | 1.785252000  | 3.081018000  | -0.656684000 |
| C  | 1.542350000  | 4.272764000  | -1.357061000 |
| C  | 1.464904000  | 4.222902000  | -2.761328000 |
| C  | 1.625721000  | 2.993815000  | -3.426422000 |
| C  | 1.856117000  | 1.836283000  | -2.662122000 |
| C  | 2.484720000  | -1.484885000 | -1.151066000 |
| C  | 3.603000000  | -1.422576000 | -1.994236000 |
| C  | 4.080626000  | -2.524044000 | -2.730346000 |
| C  | 3.427928000  | -3.765795000 | -2.601069000 |
| C  | 2.316124000  | -3.883203000 | -1.747440000 |
| C  | 1.901512000  | -2.746870000 | -1.034466000 |
| C  | -3.068409000 | -3.343162000 | 0.532203000  |
| H  | -2.906205000 | -4.291719000 | 1.084681000  |

|   |              |              |             |
|---|--------------|--------------|-------------|
| H | -4.157054000 | -3.262720000 | 0.317812000 |
|---|--------------|--------------|-------------|

**TS2-B:** E= -5819.0765391 (i = -96 cm-1)

|    |              |              |              |
|----|--------------|--------------|--------------|
| Fe | 2.053572000  | -0.115779000 | -0.135345000 |
| P  | 2.582238000  | -2.147343000 | 0.805040000  |
| P  | 2.221888000  | 0.664464000  | 1.997140000  |
| P  | 3.974970000  | 0.674098000  | -0.862058000 |
| P  | 1.806924000  | -1.085154000 | -2.221616000 |
| O  | -0.289457000 | -0.225819000 | -0.357435000 |
| F  | -3.086987000 | -4.289564000 | -1.664410000 |
| F  | -3.984965000 | 1.097468000  | -2.015443000 |
| F  | -5.295766000 | -0.559893000 | -3.631699000 |
| F  | -4.883550000 | -3.276797000 | -3.509883000 |
| F  | -1.794312000 | -2.656409000 | -0.004887000 |
| F  | -1.502535000 | 1.682099000  | -2.594974000 |
| F  | -1.605502000 | 4.314969000  | -3.021183000 |
| F  | -1.914099000 | 6.063547000  | -0.911873000 |
| F  | -2.127748000 | 2.449282000  | 2.098189000  |
| F  | -2.151314000 | 5.058175000  | 1.649633000  |
| F  | -4.005443000 | -1.517091000 | 5.101110000  |
| F  | -1.325281000 | -2.028306000 | 4.555695000  |
| F  | -0.245075000 | -1.192506000 | 2.267995000  |
| F  | -5.509021000 | -0.126960000 | 3.265712000  |
| F  | -4.396086000 | 0.732491000  | 0.954007000  |
| O  | 0.973331000  | 2.414020000  | -1.098123000 |
| C  | 1.084141000  | -3.245031000 | 0.811215000  |
| H  | 0.272000000  | -2.547645000 | 0.528132000  |
| H  | 1.221344000  | -3.937753000 | -0.044190000 |
| C  | 0.732985000  | -4.022342000 | 2.082749000  |
| H  | 1.525581000  | -4.737485000 | 2.386125000  |
| H  | -0.195077000 | -4.603789000 | 1.903289000  |
| H  | 0.518054000  | -3.344981000 | 2.931412000  |
| C  | 3.960026000  | -3.248153000 | 0.176470000  |
| H  | 3.869793000  | -3.283391000 | -0.929574000 |
| H  | 4.903254000  | -2.703759000 | 0.388161000  |
| C  | 4.017055000  | -4.667229000 | 0.757048000  |

|   |              |              |              |
|---|--------------|--------------|--------------|
| H | 4.878402000  | -5.226097000 | 0.334715000  |
| H | 3.100988000  | -5.245933000 | 0.522018000  |
| H | 4.136173000  | -4.659792000 | 1.859995000  |
| C | 2.373390000  | -0.750039000 | 3.225063000  |
| H | 2.881346000  | -0.388466000 | 4.141116000  |
| H | 1.348597000  | -1.042746000 | 3.513447000  |
| C | 0.798291000  | 1.680892000  | 2.617253000  |
| H | -0.094136000 | 1.229465000  | 2.145842000  |
| H | 0.705665000  | 1.510080000  | 3.711359000  |
| C | 0.866694000  | 3.177202000  | 2.287140000  |
| H | 1.706940000  | 3.695025000  | 2.793624000  |
| H | -0.071493000 | 3.665840000  | 2.614424000  |
| H | 0.951983000  | 3.351007000  | 1.196519000  |
| C | 3.700341000  | 1.711036000  | 2.484402000  |
| H | 4.607269000  | 1.186971000  | 2.115377000  |
| H | 3.609724000  | 2.639616000  | 1.888476000  |
| C | 3.847268000  | 2.058181000  | 3.972331000  |
| H | 4.668465000  | 2.791318000  | 4.115616000  |
| H | 4.093160000  | 1.171324000  | 4.591232000  |
| H | 2.924347000  | 2.510687000  | 4.388666000  |
| C | 4.038645000  | 0.460227000  | -2.722849000 |
| H | 3.409336000  | 1.266932000  | -3.153511000 |
| H | 5.070335000  | 0.609264000  | -3.102911000 |
| C | 3.458071000  | -0.903963000 | -3.084286000 |
| H | 4.109471000  | -1.731910000 | -2.728655000 |
| H | 3.338877000  | -1.030664000 | -4.180946000 |
| C | 0.612641000  | -0.181050000 | -3.301957000 |
| H | -0.346626000 | -0.291381000 | -2.754874000 |
| H | 0.853642000  | 0.895286000  | -3.198821000 |
| C | 0.520531000  | -0.581759000 | -4.775776000 |
| H | 1.476267000  | -0.432812000 | -5.322716000 |
| H | -0.243319000 | 0.048017000  | -5.277007000 |
| H | 0.211603000  | -1.637560000 | -4.916443000 |
| C | 1.451232000  | -2.874341000 | -2.636663000 |
| H | 1.822782000  | -2.989048000 | -3.679159000 |
| H | 2.119013000  | -3.502147000 | -2.010407000 |



|   |              |              |              |
|---|--------------|--------------|--------------|
| C | -0.001884000 | -3.341513000 | -2.536297000 |
| H | -0.096216000 | -4.383389000 | -2.905264000 |
| H | -0.685483000 | -2.713026000 | -3.139790000 |
| H | -0.374980000 | -3.316026000 | -1.500487000 |
| C | 4.303132000  | 2.515789000  | -0.655330000 |
| H | 3.331358000  | 2.954818000  | -0.354854000 |
| H | 4.979756000  | 2.613067000  | 0.216732000  |
| C | 4.874065000  | 3.285444000  | -1.854116000 |
| H | 5.833424000  | 2.864403000  | -2.216292000 |
| H | 5.062822000  | 4.340194000  | -1.564321000 |
| H | 4.166440000  | 3.307581000  | -2.706191000 |
| C | 5.585588000  | -0.122166000 | -0.335015000 |
| H | 5.512567000  | -0.260062000 | 0.765634000  |
| H | 5.539622000  | -1.142474000 | -0.768986000 |
| C | 6.898621000  | 0.569801000  | -0.718122000 |
| H | 7.768039000  | -0.028579000 | -0.373837000 |
| H | 6.989207000  | 1.575070000  | -0.258705000 |
| H | 6.999124000  | 0.690562000  | -1.816404000 |
| C | 1.259227000  | 1.350060000  | -0.692071000 |
| B | -1.640745000 | 0.238698000  | -0.015422000 |
| C | -2.671927000 | -0.663609000 | -1.023410000 |
| C | -2.590557000 | -2.063975000 | -0.937768000 |
| C | -3.288081000 | -2.959769000 | -1.764071000 |
| C | -4.199695000 | -2.450150000 | -2.702248000 |
| C | -4.391844000 | -1.060437000 | -2.771165000 |
| C | -3.656774000 | -0.207151000 | -1.921745000 |
| C | -1.838876000 | 1.886384000  | -0.232752000 |
| C | -1.719117000 | 2.464371000  | -1.509215000 |
| C | -1.756028000 | 3.841710000  | -1.770180000 |
| C | -1.905967000 | 4.737572000  | -0.698351000 |
| C | -2.038880000 | 4.221383000  | 0.598058000  |
| C | -2.012505000 | 2.827310000  | 0.794831000  |
| C | -2.262521000 | -0.191166000 | 1.486968000  |
| C | -3.612656000 | 0.042177000  | 1.811489000  |
| C | -4.215891000 | -0.386065000 | 3.006983000  |
| C | -3.451206000 | -1.100652000 | 3.951073000  |

|   |              |              |             |
|---|--------------|--------------|-------------|
| C | -2.100423000 | -1.356400000 | 3.672633000 |
| C | -1.564029000 | -0.905577000 | 2.455507000 |
| C | 3.125438000  | -1.915113000 | 2.582985000 |
| H | 3.001400000  | -2.855937000 | 3.158139000 |
| H | 4.216755000  | -1.705410000 | 2.530437000 |

**INT2:** E= -6036.752685

|    |              |              |              |
|----|--------------|--------------|--------------|
| Fe | -2.114614000 | 0.230605000  | 0.237059000  |
| P  | -2.306346000 | -1.379230000 | 2.267248000  |
| P  | -2.205016000 | -1.732363000 | -0.912114000 |
| P  | -4.223388000 | 0.881328000  | 0.080786000  |
| P  | -1.751635000 | 2.043852000  | 1.533199000  |
| O  | 0.060078000  | -0.334499000 | 0.522249000  |
| F  | 4.342526000  | -0.825387000 | 4.615569000  |
| F  | 4.545479000  | 1.077316000  | -0.518992000 |
| F  | 6.730874000  | 1.259136000  | 1.063496000  |
| F  | 6.654900000  | 0.307936000  | 3.640569000  |
| F  | 2.158317000  | -1.009725000 | 3.056283000  |
| F  | 2.539310000  | 2.989266000  | 0.522772000  |
| F  | 2.303911000  | 5.268070000  | -0.908049000 |
| F  | 1.302072000  | 5.199221000  | -3.466841000 |
| F  | 0.678166000  | 0.529424000  | -3.123168000 |
| F  | 0.494093000  | 2.808764000  | -4.559908000 |
| F  | 2.160996000  | -5.360645000 | -3.333266000 |
| F  | 1.375449000  | -5.325689000 | -0.692629000 |
| F  | 1.442338000  | -3.002802000 | 0.707085000  |
| F  | 2.989489000  | -3.048054000 | -4.552416000 |
| F  | 3.033596000  | -0.713900000 | -3.168143000 |
| O  | -1.733421000 | 1.790326000  | -2.169644000 |
| C  | -0.645526000 | -1.560520000 | 3.039006000  |
| H  | -0.009811000 | -1.157342000 | 2.206924000  |
| H  | -0.596189000 | -0.827365000 | 3.870307000  |
| C  | -0.168459000 | -2.948736000 | 3.478457000  |
| H  | -0.822433000 | -3.438261000 | 4.229603000  |
| H  | 0.842142000  | -2.841588000 | 3.920001000  |
| H  | -0.051330000 | -3.630939000 | 2.613265000  |

|   |              |              |              |
|---|--------------|--------------|--------------|
| C | -3.542323000 | -1.253167000 | 3.660280000  |
| H | -3.543034000 | -0.186128000 | 3.978319000  |
| H | -4.541050000 | -1.441440000 | 3.215071000  |
| C | -3.309787000 | -2.174875000 | 4.864887000  |
| H | -4.114834000 | -2.039874000 | 5.617723000  |
| H | -2.344534000 | -1.960362000 | 5.365244000  |
| H | -3.305976000 | -3.243890000 | 4.568843000  |
| C | -1.756373000 | -3.122428000 | 0.230670000  |
| H | -1.848191000 | -4.095359000 | -0.294516000 |
| H | -0.685226000 | -2.966324000 | 0.466773000  |
| C | -1.038423000 | -1.922666000 | -2.332071000 |
| H | -0.129587000 | -1.395114000 | -1.986897000 |
| H | -0.765927000 | -2.997234000 | -2.410220000 |
| C | -1.519850000 | -1.359305000 | -3.672277000 |
| H | -2.378620000 | -1.924557000 | -4.091312000 |
| H | -0.692482000 | -1.409572000 | -4.408090000 |
| H | -1.801208000 | -0.291234000 | -3.591475000 |
| C | -3.846316000 | -2.293006000 | -1.614810000 |
| H | -4.614470000 | -2.128754000 | -0.828754000 |
| H | -4.077231000 | -1.569967000 | -2.423723000 |
| C | -3.905683000 | -3.732095000 | -2.142628000 |
| H | -4.873782000 | -3.922917000 | -2.651358000 |
| H | -3.812100000 | -4.476740000 | -1.326032000 |
| H | -3.099741000 | -3.937314000 | -2.877012000 |
| C | -4.325750000 | 2.647071000  | 0.715715000  |
| H | -3.959504000 | 3.300071000  | -0.104580000 |
| H | -5.377885000 | 2.934846000  | 0.917307000  |
| C | -3.422123000 | 2.781885000  | 1.946885000  |
| H | -3.826775000 | 2.206954000  | 2.808884000  |
| H | -3.314054000 | 3.837460000  | 2.274520000  |
| C | -0.861856000 | 3.388222000  | 0.625447000  |
| H | 0.051468000  | 2.876406000  | 0.266044000  |
| H | -1.450694000 | 3.589418000  | -0.293536000 |
| C | -0.517591000 | 4.684465000  | 1.361933000  |
| H | -1.420099000 | 5.258381000  | 1.660727000  |
| H | 0.092794000  | 5.330645000  | 0.697669000  |

|    |              |              |              |
|----|--------------|--------------|--------------|
| H  | 0.090119000  | 4.500922000  | 2.270342000  |
| C  | -0.907187000 | 1.985416000  | 3.181044000  |
| H  | -1.135149000 | 2.947857000  | 3.691437000  |
| H  | -1.419633000 | 1.190124000  | 3.763963000  |
| C  | 0.598092000  | 1.722326000  | 3.078081000  |
| H  | 1.045416000  | 1.574264000  | 4.081400000  |
| H  | 1.135101000  | 2.552744000  | 2.579586000  |
| H  | 0.776583000  | 0.816257000  | 2.473584000  |
| C  | -4.990952000 | 0.959250000  | -1.631445000 |
| H  | -4.148018000 | 0.878655000  | -2.346589000 |
| H  | -5.578786000 | 0.023531000  | -1.736315000 |
| C  | -5.852000000 | 2.183206000  | -1.973284000 |
| H  | -6.689719000 | 2.329324000  | -1.262796000 |
| H  | -6.290450000 | 2.065070000  | -2.986075000 |
| H  | -5.252063000 | 3.114853000  | -1.987690000 |
| C  | -5.528997000 | 0.023628000  | 1.103131000  |
| H  | -5.368181000 | -1.064161000 | 0.941472000  |
| H  | -5.230729000 | 0.221702000  | 2.152726000  |
| C  | -6.995713000 | 0.405702000  | 0.874694000  |
| H  | -7.652896000 | -0.152996000 | 1.573436000  |
| H  | -7.334266000 | 0.168362000  | -0.154287000 |
| H  | -7.176811000 | 1.486318000  | 1.049823000  |
| C  | -1.821459000 | 1.134076000  | -1.199057000 |
| Al | 1.673918000  | -0.060525000 | -0.132277000 |
| C  | 3.228156000  | 0.061660000  | 1.198428000  |
| C  | 3.260616000  | -0.423621000 | 2.509570000  |
| C  | 4.382390000  | -0.349816000 | 3.355790000  |
| C  | 5.565150000  | 0.226107000  | 2.861056000  |
| C  | 5.598744000  | 0.715083000  | 1.542250000  |
| C  | 4.440157000  | 0.611403000  | 0.750519000  |
| C  | 1.687841000  | 1.635090000  | -1.263274000 |
| C  | 2.089050000  | 2.879447000  | -0.759256000 |
| C  | 1.972790000  | 4.087189000  | -1.469125000 |
| C  | 1.440577000  | 4.059669000  | -2.770893000 |
| C  | 1.034396000  | 2.834776000  | -3.329781000 |
| C  | 1.164632000  | 1.666762000  | -2.558872000 |

|   |              |              |              |
|---|--------------|--------------|--------------|
| C | 2.152271000  | -1.740912000 | -1.198629000 |
| C | 2.596563000  | -1.818519000 | -2.524673000 |
| C | 2.589350000  | -3.015782000 | -3.269228000 |
| C | 2.171051000  | -4.207010000 | -2.646160000 |
| C | 1.773234000  | -4.186939000 | -1.295668000 |
| C | 1.814153000  | -2.963263000 | -0.608956000 |
| C | -2.618296000 | -3.045586000 | 1.496081000  |
| H | -2.366087000 | -3.853130000 | 2.214016000  |
| H | -3.703453000 | -3.132392000 | 1.266440000  |

**INT2-B:** E= -5819.0822867

|    |              |              |              |
|----|--------------|--------------|--------------|
| Fe | -1.859882000 | 0.059199000  | 0.193951000  |
| P  | -2.167168000 | -1.570058000 | 1.927625000  |
| P  | -1.897979000 | -1.799350000 | -1.149627000 |
| P  | -4.059209000 | 0.566763000  | -0.086941000 |
| P  | -1.801688000 | 1.770671000  | 1.687648000  |
| O  | 0.186193000  | -0.157283000 | 0.595502000  |
| F  | 4.229458000  | -0.947064000 | 4.285969000  |
| F  | 4.150297000  | 1.024173000  | -0.798358000 |
| F  | 6.445223000  | 0.957830000  | 0.533723000  |
| F  | 6.557335000  | -0.039855000 | 3.104408000  |
| F  | 1.939738000  | -0.876059000 | 3.015556000  |
| F  | 2.298548000  | 2.808835000  | 1.063708000  |
| F  | 2.133695000  | 5.166274000  | -0.159646000 |
| F  | 1.228989000  | 5.349976000  | -2.758367000 |
| F  | 0.515116000  | 0.695457000  | -2.842532000 |
| F  | 0.428836000  | 3.055886000  | -4.069153000 |
| F  | 2.867368000  | -4.707864000 | -3.199484000 |
| F  | 1.879351000  | -4.858131000 | -0.616575000 |
| F  | 1.479430000  | -2.637752000 | 0.800533000  |
| F  | 3.407288000  | -2.241193000 | -4.287014000 |
| F  | 2.944424000  | -0.009464000 | -2.925732000 |
| O  | -1.818395000 | 1.974561000  | -1.980236000 |
| C  | -0.594344000 | -1.762068000 | 2.849206000  |
| H  | 0.096694000  | -1.282270000 | 2.114718000  |
| H  | -0.639968000 | -1.069420000 | 3.713370000  |
| C  | -0.105468000 | -3.148413000 | 3.274392000  |

|   |              |              |              |
|---|--------------|--------------|--------------|
| H | -0.781352000 | -3.668892000 | 3.984192000  |
| H | 0.881142000  | -3.026336000 | 3.764934000  |
| H | 0.067450000  | -3.810440000 | 2.403417000  |
| C | -3.519785000 | -1.525735000 | 3.218301000  |
| H | -3.612454000 | -0.468625000 | 3.549505000  |
| H | -4.466475000 | -1.771734000 | 2.698092000  |
| C | -3.328102000 | -2.450655000 | 4.426895000  |
| H | -4.191546000 | -2.363819000 | 5.119687000  |
| H | -2.413875000 | -2.198352000 | 5.000173000  |
| H | -3.252413000 | -3.514648000 | 4.122840000  |
| C | -1.481863000 | -3.271768000 | -0.098593000 |
| H | -1.566212000 | -4.209694000 | -0.683948000 |
| H | -0.426391000 | -3.160394000 | 0.209179000  |
| C | -0.804582000 | -1.931016000 | -2.631008000 |
| H | 0.151994000  | -1.485785000 | -2.306118000 |
| H | -0.613042000 | -3.009401000 | -2.818180000 |
| C | -1.330941000 | -1.220276000 | -3.883107000 |
| H | -2.209271000 | -1.732338000 | -4.328786000 |
| H | -0.534484000 | -1.189368000 | -4.653595000 |
| H | -1.599997000 | -0.166182000 | -3.670627000 |
| C | -3.552794000 | -2.336474000 | -1.855038000 |
| H | -4.313889000 | -2.193972000 | -1.061212000 |
| H | -3.792607000 | -1.600006000 | -2.645707000 |
| C | -3.625057000 | -3.758486000 | -2.425258000 |
| H | -4.598194000 | -3.921463000 | -2.934151000 |
| H | -3.536465000 | -4.532006000 | -1.635519000 |
| H | -2.827350000 | -3.947376000 | -3.172780000 |
| C | -4.316850000 | 2.256529000  | 0.683819000  |
| H | -3.892951000 | 3.009873000  | -0.011954000 |
| H | -5.397867000 | 2.479496000  | 0.791129000  |
| C | -3.568371000 | 2.282195000  | 2.016013000  |
| H | -3.995897000 | 1.550742000  | 2.736043000  |
| H | -3.605346000 | 3.279326000  | 2.502304000  |
| C | -1.012625000 | 3.320034000  | 1.051710000  |
| H | 0.056344000  | 3.048703000  | 1.014542000  |
| H | -1.316254000 | 3.446962000  | -0.005959000 |

|   |              |              |              |
|---|--------------|--------------|--------------|
| C | -1.207167000 | 4.612659000  | 1.848772000  |
| H | -2.253958000 | 4.981259000  | 1.817430000  |
| H | -0.562698000 | 5.406353000  | 1.417145000  |
| H | -0.914770000 | 4.501325000  | 2.913335000  |
| C | -1.108918000 | 1.656349000  | 3.405628000  |
| H | -1.575659000 | 2.478370000  | 3.992464000  |
| H | -1.491238000 | 0.710936000  | 3.840943000  |
| C | 0.421182000  | 1.713830000  | 3.438761000  |
| H | 0.810037000  | 1.382838000  | 4.422279000  |
| H | 0.798285000  | 2.737160000  | 3.247228000  |
| H | 0.837827000  | 1.051386000  | 2.660312000  |
| C | -4.671058000 | 0.767186000  | -1.861130000 |
| H | -3.801450000 | 0.569859000  | -2.515969000 |
| H | -5.388500000 | -0.060035000 | -2.035116000 |
| C | -5.300703000 | 2.112514000  | -2.239645000 |
| H | -6.168966000 | 2.372595000  | -1.600991000 |
| H | -5.658702000 | 2.076789000  | -3.289688000 |
| H | -4.560623000 | 2.934789000  | -2.177104000 |
| C | -5.484254000 | -0.356917000 | 0.717172000  |
| H | -5.309254000 | -1.441880000 | 0.554813000  |
| H | -5.356271000 | -0.182999000 | 1.804088000  |
| C | -6.905443000 | 0.031379000  | 0.289443000  |
| H | -7.652505000 | -0.534444000 | 0.884359000  |
| H | -7.100507000 | -0.191408000 | -0.778736000 |
| H | -7.109105000 | 1.110163000  | 0.449375000  |
| C | -1.705556000 | 1.174522000  | -1.126167000 |
| B | 1.477239000  | 0.112002000  | -0.036925000 |
| C | 2.856042000  | 0.115727000  | 1.010052000  |
| C | 2.997467000  | -0.396484000 | 2.310448000  |
| C | 4.207082000  | -0.449948000 | 3.033595000  |
| C | 5.391161000  | 0.004376000  | 2.440489000  |
| C | 5.326475000  | 0.514805000  | 1.133757000  |
| C | 4.091141000  | 0.541315000  | 0.464411000  |
| C | 1.475165000  | 1.583248000  | -0.838845000 |
| C | 1.870301000  | 2.787845000  | -0.228790000 |
| C | 1.801107000  | 4.051561000  | -0.840243000 |

|   |              |              |              |
|---|--------------|--------------|--------------|
| C | 1.324722000  | 4.153172000  | -2.157277000 |
| C | 0.925117000  | 2.983748000  | -2.822253000 |
| C | 1.005891000  | 1.754440000  | -2.147962000 |
| C | 2.011233000  | -1.175478000 | -1.027365000 |
| C | 2.613953000  | -1.158627000 | -2.303337000 |
| C | 2.887007000  | -2.324841000 | -3.050068000 |
| C | 2.624502000  | -3.589104000 | -2.497859000 |
| C | 2.118747000  | -3.660921000 | -1.189518000 |
| C | 1.883830000  | -2.468180000 | -0.488572000 |
| C | -2.406382000 | -3.237392000 | 1.121230000  |
| H | -2.173667000 | -4.043775000 | 1.846061000  |
| H | -3.475605000 | -3.346992000 | 0.835663000  |

**3:** E= -6036.7855219

|    |              |              |              |
|----|--------------|--------------|--------------|
| Fe | -2.401917000 | -0.288491000 | 0.046861000  |
| P  | -2.503519000 | -2.023249000 | 1.504649000  |
| P  | -2.319845000 | 1.035326000  | 1.892305000  |
| P  | -2.479258000 | 1.406759000  | -1.474750000 |
| P  | -2.030057000 | -1.591942000 | -1.740046000 |
| Al | 1.291033000  | 0.012119000  | -0.074804000 |
| O  | -0.414563000 | -0.341009000 | -0.022377000 |
| F  | 3.543308000  | 0.159356000  | -2.565608000 |
| F  | 4.827083000  | -1.810725000 | -3.868096000 |
| F  | 1.576324000  | -3.075183000 | 0.349193000  |
| F  | 2.846025000  | -5.041037000 | -0.988419000 |
| F  | 4.503325000  | -4.427259000 | -3.103198000 |
| F  | 1.428335000  | 5.843498000  | -2.321218000 |
| F  | 1.858993000  | 5.402297000  | 0.359367000  |
| F  | 1.940245000  | 2.901717000  | 1.331804000  |
| F  | 1.145429000  | 3.705184000  | -4.029348000 |
| F  | 1.243034000  | 1.198557000  | -3.093743000 |
| F  | 2.051029000  | -0.257536000 | 5.371010000  |
| F  | 5.792763000  | 0.912462000  | 2.659538000  |
| F  | 4.253734000  | 0.671650000  | 0.438494000  |
| F  | 4.710190000  | 0.464850000  | 5.143602000  |
| F  | 0.543536000  | -0.568816000 | 3.169947000  |



|   |              |              |              |
|---|--------------|--------------|--------------|
| O | -5.282115000 | -0.531366000 | -0.104903000 |
| C | -3.200715000 | -1.333087000 | 3.094065000  |
| H | -4.278886000 | -1.150282000 | 2.894143000  |
| H | -3.129877000 | -2.073851000 | 3.916460000  |
| C | -2.462038000 | -0.034876000 | 3.428325000  |
| H | -1.430487000 | -0.253720000 | 3.758478000  |
| H | -2.954743000 | 0.534970000  | 4.243286000  |
| C | -3.648512000 | 2.312432000  | 2.192650000  |
| H | -3.276223000 | 2.974293000  | 3.005284000  |
| H | -3.689437000 | 2.933917000  | 1.274740000  |
| C | -5.038900000 | 1.768303000  | 2.542183000  |
| H | -5.426725000 | 1.073433000  | 1.771846000  |
| H | -5.767830000 | 2.599316000  | 2.639715000  |
| H | -5.034042000 | 1.224131000  | 3.509309000  |
| C | -0.772164000 | 2.014210000  | 2.125534000  |
| H | 0.011743000  | 1.374594000  | 1.681660000  |
| H | -0.861854000 | 2.889845000  | 1.452682000  |
| C | -0.396888000 | 2.447775000  | 3.544461000  |
| H | -1.188883000 | 3.048586000  | 4.040101000  |
| H | 0.519203000  | 3.069791000  | 3.493735000  |
| H | -0.163770000 | 1.577564000  | 4.188470000  |
| C | -0.919794000 | -2.870054000 | 1.948062000  |
| H | -0.838116000 | -3.737420000 | 1.261373000  |
| H | -0.152695000 | -2.145849000 | 1.614359000  |
| C | -0.697775000 | -3.300380000 | 3.401715000  |
| H | -0.680450000 | -2.436009000 | 4.093149000  |
| H | 0.295450000  | -3.788194000 | 3.485656000  |
| H | -1.458451000 | -4.022597000 | 3.761759000  |
| C | -3.706589000 | -3.379543000 | 1.084461000  |
| H | -4.672391000 | -2.871610000 | 0.877337000  |
| H | -3.364845000 | -3.794996000 | 0.112609000  |
| C | -3.877413000 | -4.503581000 | 2.113995000  |
| H | -2.933550000 | -5.064234000 | 2.270662000  |
| H | -4.640436000 | -5.232150000 | 1.768264000  |
| H | -4.212557000 | -4.119330000 | 3.099327000  |
| C | -1.722305000 | 3.073321000  | -1.143607000 |

|   |              |              |              |
|---|--------------|--------------|--------------|
| H | -2.229402000 | 3.461148000  | -0.234310000 |
| H | -0.675505000 | 2.866809000  | -0.850691000 |
| C | -1.799732000 | 4.100080000  | -2.279765000 |
| H | -1.327523000 | 3.729654000  | -3.211641000 |
| H | -1.248825000 | 5.020715000  | -1.997065000 |
| H | -2.843077000 | 4.394151000  | -2.516718000 |
| C | -1.740484000 | 0.822349000  | -3.108159000 |
| H | -2.565943000 | 0.830029000  | -3.850336000 |
| H | -0.983818000 | 1.550798000  | -3.457292000 |
| C | -1.122873000 | -0.572841000 | -2.987707000 |
| H | -0.090668000 | -0.510635000 | -2.598935000 |
| H | -1.086933000 | -1.093234000 | -3.966627000 |
| C | -3.576711000 | -2.151801000 | -2.621266000 |
| H | -4.206449000 | -2.633567000 | -1.843344000 |
| H | -4.113711000 | -1.213017000 | -2.879555000 |
| C | -3.427549000 | -3.057488000 | -3.848170000 |
| H | -2.996940000 | -4.043019000 | -3.578159000 |
| H | -2.773827000 | -2.605948000 | -4.623163000 |
| H | -4.415459000 | -3.247154000 | -4.318108000 |
| C | -0.984133000 | -3.107063000 | -1.534762000 |
| H | -0.327541000 | -2.837969000 | -0.688691000 |
| H | -1.660735000 | -3.920618000 | -1.193781000 |
| C | -0.126440000 | -3.562594000 | -2.725403000 |
| H | -0.722647000 | -3.822919000 | -3.621988000 |
| H | 0.456362000  | -4.459472000 | -2.430040000 |
| H | 0.611079000  | -2.786021000 | -3.008422000 |
| C | -4.185984000 | 1.884152000  | -2.085986000 |
| H | -4.031631000 | 2.443169000  | -3.034113000 |
| H | -4.686634000 | 0.931368000  | -2.360081000 |
| C | -5.068567000 | 2.690064000  | -1.130145000 |
| H | -5.299846000 | 2.124488000  | -0.208145000 |
| H | -6.037079000 | 2.932719000  | -1.614616000 |
| H | -4.598106000 | 3.653133000  | -0.841710000 |
| C | 2.393284000  | -1.366780000 | -1.116559000 |
| C | 3.287683000  | -1.104900000 | -2.167710000 |
| C | 3.996398000  | -2.111242000 | -2.855787000 |

|   |              |              |              |
|---|--------------|--------------|--------------|
| C | 3.847621000  | -3.451899000 | -2.456895000 |
| C | 3.011164000  | -3.759491000 | -1.370599000 |
| C | 2.342302000  | -2.708685000 | -0.722741000 |
| C | 1.594697000  | 1.903811000  | -0.827695000 |
| C | 1.437089000  | 2.196980000  | -2.187891000 |
| C | 1.398837000  | 3.495605000  | -2.722163000 |
| C | 1.530684000  | 4.590105000  | -1.851659000 |
| C | 1.733571000  | 4.359953000  | -0.479909000 |
| C | 1.765640000  | 3.032015000  | -0.010349000 |
| C | 2.328768000  | 0.033335000  | 1.695393000  |
| C | 1.849964000  | -0.198470000 | 2.982146000  |
| C | 2.603695000  | -0.054238000 | 4.158458000  |
| C | 3.953258000  | 0.322324000  | 4.045614000  |
| C | 4.504188000  | 0.550347000  | 2.769419000  |
| C | 3.681568000  | 0.402875000  | 1.637380000  |
| C | -4.110752000 | -0.398878000 | -0.016739000 |

**3-B:** E= -2209.252418

|    |              |              |              |
|----|--------------|--------------|--------------|
| Fe | -2.170309000 | -0.107118000 | -0.176166000 |
| P  | -2.531407000 | -2.297627000 | 0.435112000  |
| P  | -2.308264000 | 0.358738000  | 2.047997000  |
| P  | -2.135548000 | 2.040910000  | -0.934725000 |
| P  | -1.793374000 | -0.647526000 | -2.337418000 |
| B  | 1.301222000  | 0.079499000  | 0.023952000  |
| O  | -0.090407000 | -0.185631000 | -0.251108000 |
| F  | 3.804994000  | 1.240352000  | -1.670914000 |
| F  | 5.074473000  | -0.027779000 | -3.606884000 |
| F  | 1.400197000  | -2.769784000 | -0.666266000 |
| F  | 2.675120000  | -4.016199000 | -2.627307000 |
| F  | 4.561337000  | -2.678480000 | -4.148555000 |
| F  | 1.944491000  | 5.982355000  | 0.405717000  |
| F  | 2.127664000  | 4.434370000  | 2.682430000  |
| F  | 1.998641000  | 1.802483000  | 2.557648000  |
| F  | 1.670842000  | 4.735687000  | -2.043781000 |
| F  | 1.514450000  | 2.107250000  | -2.214104000 |
| F  | 1.094241000  | -2.817982000 | 4.270745000  |

|   |              |              |              |
|---|--------------|--------------|--------------|
| F | 5.321785000  | -1.029805000 | 2.973126000  |
| F | 4.147687000  | 0.230162000  | 0.907631000  |
| F | 3.833264000  | -2.575301000 | 4.697372000  |
| F | -0.049447000 | -1.632947000 | 2.203579000  |
| O | -5.029141000 | -0.049259000 | -0.570441000 |
| C | -3.374379000 | -2.225969000 | 2.107224000  |
| H | -4.417574000 | -1.918705000 | 1.875855000  |
| H | -3.420121000 | -3.230504000 | 2.573987000  |
| C | -2.698472000 | -1.203102000 | 3.023048000  |
| H | -1.749427000 | -1.598604000 | 3.424028000  |
| H | -3.338542000 | -0.943874000 | 3.891523000  |
| C | -3.635157000 | 1.509984000  | 2.690157000  |
| H | -3.320537000 | 1.783755000  | 3.721679000  |
| H | -3.556174000 | 2.435405000  | 2.085332000  |
| C | -5.076996000 | 0.988726000  | 2.697655000  |
| H | -5.424137000 | 0.680334000  | 1.692763000  |
| H | -5.769118000 | 1.775838000  | 3.062363000  |
| H | -5.195879000 | 0.116129000  | 3.372529000  |
| C | -0.794094000 | 1.105103000  | 2.788178000  |
| H | 0.012478000  | 0.762700000  | 2.120997000  |
| H | -0.887110000 | 2.198335000  | 2.621536000  |
| C | -0.484715000 | 0.791610000  | 4.253381000  |
| H | -1.316960000 | 1.058803000  | 4.939057000  |
| H | 0.412884000  | 1.363836000  | 4.561749000  |
| H | -0.250140000 | -0.282077000 | 4.395768000  |
| C | -1.164171000 | -3.552446000 | 0.527756000  |
| H | -1.241373000 | -4.145565000 | -0.408003000 |
| H | -0.248119000 | -2.949771000 | 0.443110000  |
| C | -1.106826000 | -4.459385000 | 1.761757000  |
| H | -0.918355000 | -3.874577000 | 2.683234000  |
| H | -0.258778000 | -5.167982000 | 1.656521000  |
| H | -2.027482000 | -5.062280000 | 1.903096000  |
| C | -3.818226000 | -3.193389000 | -0.582347000 |
| H | -4.695301000 | -2.519305000 | -0.664820000 |
| H | -3.388041000 | -3.269436000 | -1.603712000 |
| C | -4.240583000 | -4.580918000 | -0.081875000 |

|   |              |              |              |
|---|--------------|--------------|--------------|
| H | -3.385499000 | -5.285999000 | -0.040678000 |
| H | -4.998157000 | -5.021613000 | -0.763295000 |
| H | -4.694399000 | -4.538446000 | 0.929489000  |
| C | -1.406110000 | 3.403163000  | 0.090740000  |
| H | -2.031401000 | 3.430751000  | 1.008337000  |
| H | -0.415757000 | 3.035346000  | 0.411368000  |
| C | -1.331162000 | 4.792897000  | -0.550431000 |
| H | -0.766119000 | 4.784737000  | -1.503466000 |
| H | -0.792757000 | 5.490986000  | 0.123165000  |
| H | -2.334900000 | 5.222727000  | -0.747207000 |
| C | -1.344387000 | 2.081188000  | -2.646985000 |
| H | -2.142488000 | 2.408065000  | -3.345612000 |
| H | -0.551903000 | 2.852572000  | -2.678544000 |
| C | -0.788096000 | 0.714306000  | -3.057628000 |
| H | 0.211467000  | 0.550276000  | -2.619641000 |
| H | -0.715371000 | 0.616170000  | -4.159988000 |
| C | -3.332851000 | -0.703983000 | -3.393810000 |
| H | -4.035787000 | -1.399470000 | -2.888603000 |
| H | -3.794740000 | 0.300607000  | -3.280849000 |
| C | -3.176666000 | -1.065070000 | -4.875524000 |
| H | -2.822314000 | -2.107309000 | -5.010414000 |
| H | -2.460391000 | -0.396052000 | -5.396154000 |
| H | -4.150592000 | -0.979288000 | -5.401789000 |
| C | -0.872025000 | -2.204716000 | -2.727274000 |
| H | -0.282557000 | -2.394176000 | -1.814289000 |
| H | -1.633267000 | -3.011372000 | -2.806761000 |
| C | 0.052229000  | -2.190364000 | -3.954299000 |
| H | -0.490999000 | -2.025931000 | -4.905800000 |
| H | 0.584552000  | -3.161124000 | -4.022906000 |
| H | 0.831985000  | -1.409703000 | -3.859297000 |
| C | -3.789768000 | 2.800539000  | -1.406034000 |
| H | -3.541297000 | 3.669164000  | -2.053458000 |
| H | -4.292411000 | 2.058411000  | -2.061278000 |
| C | -4.732134000 | 3.234395000  | -0.282696000 |
| H | -5.054762000 | 2.378062000  | 0.337481000  |
| H | -5.649850000 | 3.689371000  | -0.710002000 |

|   |              |              |              |
|---|--------------|--------------|--------------|
| H | -4.270909000 | 3.996104000  | 0.379325000  |
| C | 2.333032000  | -0.615284000 | -1.179426000 |
| C | 3.383804000  | -0.019458000 | -1.912992000 |
| C | 4.117897000  | -0.678107000 | -2.921418000 |
| C | 3.880295000  | -2.035825000 | -3.187102000 |
| C | 2.926525000  | -2.708315000 | -2.410873000 |
| C | 2.228123000  | -1.994971000 | -1.422652000 |
| C | 1.658245000  | 1.751711000  | 0.161449000  |
| C | 1.646033000  | 2.605281000  | -0.957272000 |
| C | 1.768673000  | 4.002545000  | -0.914930000 |
| C | 1.908743000  | 4.642250000  | 0.325221000  |
| C | 1.978735000  | 3.850383000  | 1.480142000  |
| C | 1.874687000  | 2.448079000  | 1.368363000  |
| C | 1.986862000  | -0.666243000 | 1.396560000  |
| C | 1.301127000  | -1.464939000 | 2.309237000  |
| C | 1.871478000  | -2.106762000 | 3.421313000  |
| C | 3.248223000  | -1.975058000 | 3.649191000  |
| C | 4.003558000  | -1.183471000 | 2.762281000  |
| C | 3.363298000  | -0.554264000 | 1.680288000  |
| C | -3.863421000 | -0.069367000 | -0.375579000 |

**(N<sub>2</sub>) Fe (depe)<sub>2</sub>: E= -3530.7042883**

|    |              |              |              |
|----|--------------|--------------|--------------|
| Fe | 0.013702000  | -0.146650000 | -0.280674000 |
| P  | -0.464802000 | 1.913007000  | 0.303353000  |
| P  | 2.092786000  | 0.572327000  | -0.481882000 |
| P  | 0.480297000  | -1.711458000 | 1.167738000  |
| P  | -2.058299000 | -0.908674000 | -0.178676000 |
| C  | 1.086414000  | 2.998926000  | 0.378757000  |
| C  | 2.121643000  | 2.446897000  | -0.597074000 |
| C  | -1.067749000 | -2.653239000 | 1.718806000  |
| C  | -2.083672000 | -2.629402000 | 0.580834000  |
| C  | -1.326006000 | 2.483958000  | 1.889697000  |
| C  | -1.198687000 | 3.958607000  | 2.296329000  |
| C  | -1.520640000 | 2.875441000  | -0.931582000 |
| C  | -0.915191000 | 2.921634000  | -2.337774000 |
| C  | 3.015754000  | 0.139301000  | -2.047278000 |

|   |              |              |              |
|---|--------------|--------------|--------------|
| C | 3.359256000  | -1.346555000 | -2.179251000 |
| C | 3.407485000  | 0.262360000  | 0.828402000  |
| C | 4.823828000  | 0.792620000  | 0.576314000  |
| C | 1.565056000  | -3.144505000 | 0.594228000  |
| C | 1.001413000  | -3.851679000 | -0.642240000 |
| C | 1.262428000  | -1.457712000 | 2.870156000  |
| C | 0.813731000  | -0.152982000 | 3.526496000  |
| C | -2.950841000 | -1.253595000 | -1.784313000 |
| C | -3.328283000 | -0.000195000 | -2.579365000 |
| C | -3.399197000 | -0.058023000 | 0.826961000  |
| C | -4.813011000 | -0.650418000 | 0.812377000  |
| N | 0.025984000  | -0.541995000 | -2.002011000 |
| N | 0.036197000  | -0.806926000 | -3.125086000 |
| H | 1.468208000  | 2.940825000  | 1.422371000  |
| H | 0.836593000  | 4.062913000  | 0.180124000  |
| H | 1.850570000  | 2.683350000  | -1.646441000 |
| H | 3.141877000  | 2.849017000  | -0.420406000 |
| H | -1.465018000 | -2.116871000 | 2.608528000  |
| H | -0.803038000 | -3.683039000 | 2.043877000  |
| H | -1.785566000 | -3.318806000 | -0.235640000 |
| H | -3.107527000 | -2.915599000 | 0.902621000  |
| H | -0.946311000 | 1.820901000  | 2.692578000  |
| H | -2.395286000 | 2.221559000  | 1.761292000  |
| H | -1.826497000 | 4.176533000  | 3.187127000  |
| H | -0.156645000 | 4.232810000  | 2.559325000  |
| H | -1.529384000 | 4.646161000  | 1.489597000  |
| H | -1.732935000 | 3.899525000  | -0.552115000 |
| H | -2.489892000 | 2.332119000  | -0.954163000 |
| H | -1.654470000 | 3.268829000  | -3.089920000 |
| H | -0.049695000 | 3.615843000  | -2.384920000 |
| H | -0.557431000 | 1.915907000  | -2.641746000 |
| H | 3.924271000  | 0.777352000  | -2.106537000 |
| H | 2.345844000  | 0.451910000  | -2.875151000 |
| H | 3.862814000  | -1.554786000 | -3.146417000 |
| H | 4.039975000  | -1.690698000 | -1.371160000 |
| H | 2.441084000  | -1.964101000 | -2.140102000 |

|   |              |              |              |
|---|--------------|--------------|--------------|
| H | 3.436176000  | -0.836749000 | 0.974496000  |
| H | 2.985336000  | 0.681056000  | 1.766677000  |
| H | 5.476491000  | 0.598608000  | 1.454052000  |
| H | 5.298896000  | 0.304068000  | -0.299178000 |
| H | 4.838064000  | 1.887715000  | 0.395872000  |
| H | 1.729403000  | -3.854571000 | 1.435949000  |
| H | 2.550542000  | -2.690058000 | 0.355942000  |
| H | 1.758599000  | -4.504996000 | -1.124087000 |
| H | 0.131716000  | -4.491658000 | -0.384033000 |
| H | 0.658481000  | -3.105496000 | -1.390082000 |
| H | 2.364439000  | -1.472111000 | 2.742234000  |
| H | 1.010436000  | -2.340974000 | 3.498053000  |
| H | 1.330989000  | 0.029643000  | 4.492289000  |
| H | 1.012182000  | 0.700386000  | 2.843782000  |
| H | -0.279769000 | -0.151900000 | 3.724263000  |
| H | -3.844028000 | -1.875723000 | -1.557958000 |
| H | -2.256294000 | -1.886796000 | -2.374932000 |
| H | -3.842723000 | -0.271039000 | -3.525219000 |
| H | -4.013441000 | 0.662966000  | -2.008979000 |
| H | -2.427672000 | 0.586133000  | -2.846912000 |
| H | -3.425705000 | 0.993371000  | 0.472665000  |
| H | -2.987441000 | -0.020641000 | 1.858650000  |
| H | -5.479997000 | -0.089514000 | 1.501269000  |
| H | -5.270518000 | -0.602747000 | -0.197277000 |
| H | -4.829350000 | -1.711927000 | 1.136073000  |

**6+**: E= -4939.1997082

|    |              |              |              |
|----|--------------|--------------|--------------|
| Au | -0.105281000 | 0.034911000  | -0.136894000 |
| Fe | 2.448825000  | -0.274272000 | 0.051961000  |
| P  | -2.312603000 | 0.184339000  | -0.983538000 |
| P  | 2.038686000  | 0.027906000  | 2.235167000  |
| P  | 2.546211000  | 1.987458000  | -0.056812000 |
| P  | 1.980594000  | -2.493515000 | 0.062773000  |
| P  | 2.644214000  | -0.501015000 | -2.182356000 |
| C  | -3.859357000 | 0.519438000  | -0.007834000 |
| N  | 4.189410000  | -0.614421000 | 0.257701000  |



|   |              |              |              |
|---|--------------|--------------|--------------|
| C | -4.794686000 | -0.502017000 | 0.340659000  |
| C | -5.309292000 | 2.166075000  | 1.094234000  |
| C | -3.046852000 | 2.930158000  | 0.457710000  |
| C | -4.564336000 | -1.966214000 | 0.125437000  |
| C | -4.091573000 | 1.851314000  | 0.455500000  |
| C | -2.103849000 | 2.918244000  | 1.526983000  |
| C | -5.989766000 | -0.148187000 | 1.006131000  |
| N | 5.286787000  | -0.896768000 | 0.408439000  |
| C | -6.270644000 | 1.179373000  | 1.350323000  |
| C | 1.453137000  | 1.782030000  | 2.497253000  |
| C | 2.305885000  | 2.720079000  | 1.656463000  |
| C | -5.309692000 | -2.666360000 | -0.862277000 |
| C | -3.085396000 | 4.010980000  | -0.461852000 |
| C | -5.082729000 | -4.046766000 | -1.032437000 |
| C | -1.169255000 | 5.016773000  | 0.681343000  |
| C | -1.174294000 | 3.973190000  | 1.620820000  |
| C | 3.188497000  | -2.266865000 | -2.437725000 |
| C | 2.213608000  | -3.164977000 | -1.680443000 |
| C | -2.117218000 | 5.033345000  | -0.350712000 |
| C | -4.162807000 | -4.730870000 | -0.222702000 |
| C | -3.457081000 | -4.036662000 | 0.771591000  |
| C | -3.637679000 | -2.650873000 | 0.958484000  |
| H | -0.465242000 | 3.991891000  | 2.463215000  |
| H | -0.437351000 | 5.834505000  | 0.770023000  |
| H | -2.132528000 | 5.867829000  | -1.070573000 |
| H | -5.641317000 | -4.592524000 | -1.809757000 |
| H | -4.006066000 | -5.812556000 | -0.357956000 |
| H | -2.763642000 | -4.578705000 | 1.434456000  |
| C | -2.580911000 | -1.336670000 | -2.007862000 |
| H | -2.495388000 | -2.258225000 | -1.405389000 |
| H | -3.560658000 | -1.319950000 | -2.522236000 |
| H | -1.772792000 | -1.329237000 | -2.767123000 |
| C | -2.285838000 | 1.442107000  | -2.341726000 |
| H | -3.275339000 | 1.535203000  | -2.830185000 |
| H | -1.957065000 | 2.421997000  | -1.954331000 |
| H | -1.539874000 | 1.088852000  | -3.081003000 |

|   |              |              |              |
|---|--------------|--------------|--------------|
| H | -5.472667000 | 3.203939000  | 1.424943000  |
| H | -7.214384000 | 1.437169000  | 1.855316000  |
| H | -6.697253000 | -0.950753000 | 1.267905000  |
| C | -4.161151000 | 4.111324000  | -1.521066000 |
| H | -4.923006000 | 4.865312000  | -1.226966000 |
| H | -3.743032000 | 4.438511000  | -2.495276000 |
| H | -4.694949000 | 3.153519000  | -1.669795000 |
| C | -2.140483000 | 1.823020000  | 2.568851000  |
| H | -1.483342000 | 2.056052000  | 3.428794000  |
| H | -3.168774000 | 1.662002000  | 2.952248000  |
| H | -1.811028000 | 0.853346000  | 2.138758000  |
| C | -2.838284000 | -1.917156000 | 2.010552000  |
| H | -2.008621000 | -1.340013000 | 1.541954000  |
| H | -3.454696000 | -1.184024000 | 2.568063000  |
| H | -2.381718000 | -2.619674000 | 2.735657000  |
| C | -6.307125000 | -1.939259000 | -1.736500000 |
| H | -7.225706000 | -1.675921000 | -1.170241000 |
| H | -5.899766000 | -0.978420000 | -2.116186000 |
| H | -6.615020000 | -2.557137000 | -2.602782000 |
| H | 1.210627000  | -3.147360000 | -2.160748000 |
| H | 2.542478000  | -4.222625000 | -1.659332000 |
| H | 3.249902000  | -2.513882000 | -3.517668000 |
| H | 4.215218000  | -2.339314000 | -2.020833000 |
| H | 3.313695000  | 2.847318000  | 2.105064000  |
| H | 1.856936000  | 3.731184000  | 1.560943000  |
| H | 1.451901000  | 2.046190000  | 3.575404000  |
| H | 0.404713000  | 1.785724000  | 2.141634000  |
| C | 3.185726000  | -3.511959000 | 1.105146000  |
| H | 2.594051000  | -4.283646000 | 1.640507000  |
| H | 3.562727000  | -2.811780000 | 1.877357000  |
| C | 0.321546000  | -3.255251000 | 0.477102000  |
| H | 0.058286000  | -2.930843000 | 1.502764000  |
| H | -0.398642000 | -2.730503000 | -0.187547000 |
| C | 3.986248000  | 0.428771000  | -3.101976000 |
| H | 4.468170000  | -0.285021000 | -3.803775000 |
| H | 4.748493000  | 0.665934000  | -2.330299000 |

|   |              |              |              |
|---|--------------|--------------|--------------|
| C | 1.163974000  | -0.377330000 | -3.320770000 |
| H | 0.341600000  | -0.862517000 | -2.755176000 |
| H | 0.898569000  | 0.701183000  | -3.347298000 |
| C | 3.585327000  | -0.056720000 | 3.285465000  |
| H | 4.366416000  | 0.478087000  | 2.706004000  |
| H | 3.903006000  | -1.122439000 | 3.271646000  |
| C | 0.775235000  | -0.883084000 | 3.279355000  |
| H | 0.480715000  | -0.178192000 | 4.086287000  |
| H | -0.116633000 | -0.995093000 | 2.626859000  |
| C | 4.113468000  | 2.903093000  | -0.535019000 |
| H | 4.210319000  | 2.871273000  | -1.637382000 |
| H | 3.915225000  | 3.966048000  | -0.278444000 |
| C | 1.236790000  | 2.900646000  | -1.049447000 |
| H | 0.318807000  | 2.803888000  | -0.429109000 |
| H | 1.044802000  | 2.278103000  | -1.947465000 |
| C | 0.209060000  | -4.776120000 | 0.325952000  |
| H | 0.895397000  | -5.324283000 | 1.003716000  |
| H | -0.821816000 | -5.104023000 | 0.567164000  |
| H | 0.417107000  | -5.112105000 | -0.710072000 |
| C | 1.190561000  | -2.225001000 | 3.890288000  |
| H | 0.344661000  | -2.662168000 | 4.460336000  |
| H | 1.487451000  | -2.968649000 | 3.127092000  |
| H | 2.040062000  | -2.120401000 | 4.594833000  |
| C | 4.370754000  | -4.173748000 | 0.390069000  |
| H | 5.020363000  | -4.681568000 | 1.132680000  |
| H | 4.046435000  | -4.944667000 | -0.337838000 |
| H | 5.004184000  | -3.436381000 | -0.140757000 |
| C | 3.502113000  | 0.481421000  | 4.718585000  |
| H | 2.698763000  | -0.003280000 | 5.310728000  |
| H | 4.457463000  | 0.305058000  | 5.255279000  |
| H | 3.317568000  | 1.575223000  | 4.737415000  |
| C | 5.408448000  | 2.431225000  | 0.133873000  |
| H | 5.300111000  | 2.312220000  | 1.232525000  |
| H | 5.758796000  | 1.461731000  | -0.265236000 |
| H | 6.216433000  | 3.172930000  | -0.032832000 |
| C | 1.483929000  | 4.365181000  | -1.419904000 |

|   |             |              |              |
|---|-------------|--------------|--------------|
| H | 1.706096000 | 4.988618000  | -0.529160000 |
| H | 2.320845000 | 4.489038000  | -2.137123000 |
| H | 0.572297000 | 4.791534000  | -1.886996000 |
| C | 1.296569000 | -0.967356000 | -4.729548000 |
| H | 2.175438000 | -0.571300000 | -5.278338000 |
| H | 1.390260000 | -2.072213000 | -4.703619000 |
| H | 0.396938000 | -0.731532000 | -5.335613000 |
| C | 3.548218000 | 1.689478000  | -3.860229000 |
| H | 4.434031000 | 2.242409000  | -4.234916000 |
| H | 2.918583000 | 1.446892000  | -4.739155000 |
| H | 2.967408000 | 2.389114000  | -3.227732000 |

## 8. References

- <sup>1</sup> Uson, R.; Laguna, A.; Laguna, M.; Briggs, D. A.; Murray, H. H.; Fackler, J. P. (Tetrahydrothiophene)Gold(I) or Gold(III) Complexes. *Inorg. Synth.* **2007**, *26*, 85-91.
- <sup>2</sup> Marín, M.; Moreno, J. J.; Navarro-Gilabert, C.; Álvarez, E.; Maya, C.; Peloso, R.; Nicasio, M. C.; Carmona, E. Synthesis, Structure and Nickel Carbonyl Complexes of Dialkylterphenyl Phosphines. *Chem. Eur. J.* **2019**, *25*, 260-272.
- <sup>3</sup> Komiya, S.; Akita, M.; Yoza, A.; Kasuga, N.; Fukuoka, A. and Kaib. Y. Isolation of a Zerovalent Iron Dinitrogen Complex with 1,2-bis(diethylphosphino)ethane Ligands. *J. Chem. Soc., Chem. Commun.* **1993**, 787-788.
- <sup>4</sup> Hirano, M.; Akita, M.; Tani, K.; Kumagai, K.; Kasuga, N.; Fukuoka, A. and Komiya. Activation of Coordinated Carbon Dioxide in Fe(CO<sub>2</sub>)(depe)<sub>2</sub> by Group 14 Electrophiles. *S. Organometallics* **1997**, *16*, 4206-4213
- <sup>5</sup> Chen, J.; Chen, E. Y.-X. Unsolvated Al(C<sub>6</sub>F<sub>5</sub>)<sub>3</sub>: Structural Features and Electronic Interaction with Ferrocene. *Dalton Trans.* **2016**, *45*, 6105-6110.
- <sup>6</sup> Hidalgo, N.; Moreno, J. J.; Pérez-Jiménez, M.; Maya, C.; López-Serrano, J.; Campos, J. Evidence for Genuine Bimetallic Frustrated Lewis Pair Activation of Dihydrogen with Gold(I)/Platinum(0) Systems. *Chem. Eur. J.* **2020**, *26*, 5982-5993.
- <sup>7</sup> Sheldrick, G. M. SADABS, *Program for Empirical Absorption Correction of Area Detector Data*. Göttingen: University of Göttingen; **1996**.
- <sup>8</sup> Sheldrick, G. M. SHELXTL, version 6.14. *Program for solution and refinement of crystal structures*, Universität Göttingen, Germany, **2000**.
- <sup>9</sup> Gaussian 09, Revision E.01, Frisch, M. J.; Trucks, G. W.; Schlegel, H. B.; Scuseria, G. E.; Robb, M. A.; Cheeseman, J. R.; Scalmani, G.; Barone, V.; Petersson, G. A.; Nakatsuji, H.; Li, X.; Caricato, M.; Marenich, A. V.; Bloino, J.; Janesko, B. G.; Gomperts, R.; Mennucci, B.; Hratchian, H. P.; Ortiz, J. V.; Izmaylov, A. F.; Sonnenberg, J. L.; Williams-Young, D.; Ding, F.; Lipparini, F.; Egidi, F.; Goings, J.; Peng, B.; Petrone, A.; Henderson, T.; Ranasinghe, D.; Zakrzewski, V. G.; Gao, J.; Rega, N.; Zheng, G.; Liang, W.; Hada, M.; Ehara, M.; Toyota, K.; Fukuda, R.; Hasegawa, J.; Ishida, M.; Nakajima, T.; Honda, Y.; Kitao, O.; Nakai, H.; Vreven, T.; Throssell, K.; Montgomery, J. A., Jr.; Peralta, J. E.; Ogliaro, F.; Bearpark, M. J.; Heyd, J. J.; Brothers, E. N.; Kudin, K. N.; Staroverov, V. N.; Keith, T. A.; Kobayashi, R.; Normand, J.; Raghavachari, K.; Rendell, A. P.; Burant, J. C.; Iyengar, S. S.; Tomasi, J.; Cossi, M.; Millam, J. M.; Klene, M.; Adamo, C.; Cammi, R.; Ochterski, J. W.; Martin, R. L.; Morokuma, K.; Farkas, O.; Foresman, J. B.; Fox, D. J. Gaussian, Inc., Wallingford CT, 2016.
- <sup>10</sup> (a) Becke, A. D. *Phys. Rev. A* **1988**, *38*, 3098. (b) Perdew, J. P. *Phys. Rev. B* **1986**, *33*, 8822.
- <sup>11</sup> Weigend, F.; Ahlrichs, R. *Phys. Chem. Chem. Phys.* **2005**, *7*, 3297.
- <sup>12</sup> Grimme, S.; Antony, J.; Ehrlich, S.; Krieg, H. *J. Chem. Phys.* **2010**, *132*, 154104.
- <sup>13</sup> Gonzalez, C.; Schlegel, H. B. *J. Phys. Chem.* **1990**, *94*, 5523.
- <sup>14</sup> (a) Miertuš, S.; Scrocco, E.; Tomasi, J. *Chem. Phys.* **1981**, *55*, 117-129. (b) Pascual-Ahuir, J. L.; Silla, E.; Tuñón, I. *J. Comput. Chem.* **1994**, *15*, 1127. (c) Barone, V.; Cossi, M. *J. Phys. Chem. A* **1998**, *102*, 1995.
- <sup>15</sup> For a recent review, see: von Hopffgarten, M.; Frenking, G. *WIREs Comput. Mol. Sci.* **2012**, *2*, 43.
- <sup>16</sup> Mitoraj, M.; Michalak, A.; Ziegler, T. *J. Chem. Theory Comput.* **2009**, *5*, 962.
- <sup>17</sup> ADF program: [www.scm.com](http://www.scm.com).
- <sup>18</sup> Snijders, J. G.; Baerends, E. J.; Vernoojs, P. *At. Data. Nucl. Data Tables* **1982**, *26*, 483.
- <sup>19</sup> Krijn, A.; Baerends, E. J.; Fit Functions in the HFS-Method, Internal Report (in Dutch), Vrije Universiteit Amsterdam, The Netherlands, **1984**.
- <sup>20</sup> (a) van Lenthe, E.; Baerends, E. J.; Snijders, J. G. *J. Chem. Phys.* **1993**, *99*, 4597. (b) van Lenthe, E.; Baerends, E. J.; Snijders, J. G. *J. Chem. Phys.* **1994**, *101*, 9783. (c) van Lenthe, E.; Ehlers, A.; Baerends, E. J. *J. Chem. Phys.* **1999**, *110*, 8943.
- <sup>21</sup> See, for instance: (a) Zhang, Q.; Li, W.-L.; Xu, C.-Q.; Chen, M.; Zhou, M.; Li, J.; Andrada, D. M.; Frenking, G. *Angew. Chem. Int. Ed.* **2015**, *54*, 11078; (b) Wu, Z.; Xu, J.; Sokolenko, L.; Yagupolskii, Y. L.; Feng, R.; Liu, Q.; Lu, Y.; Zhao, L.; Fernández, I.; Frenking, G.; Trabelsi, T.; Francisco, J. S.; Zeng, X. *Chem. Eur. J.* **2017**, *23*, 16566; (c) Georgiou, D. C.; Zhao, L.; Wilson, D. J. D.; Frenking, G.; Dutton, J. L. *Chem. Eur. J.* **2017**, *23*, 2926; (d) Fernández, I.; Holzmann, N.; Frenking, G. *Chem. Eur. J.* **2020**, *26*, 14194; and references therein.
